# Supplementary material for: Evaluation of Urtica dioica Phytochemicals against Therapeutic Targets of Allergic Rhinitis Using Computational Studies
Source: MDPI journal article supplement (doi:10.3390/molecules29081765), 2024-04-12
Supplement: s1 [file s1]

**Table S1.** UD Phytochemicals docking values against HR1. Values in kcal/mol.

| Phytochemical                                          | PubChem CID | Moe Result | AutoVina Result | Mean value | Deviation  |
|--------------------------------------------------------|-------------|------------|-----------------|------------|------------|
| 7 $\alpha$ -Hydroxy sitosterol                         | 161816      | -6.2302    | -8.7            | -7.4651    | 1.74641233 |
| Beta-Sitosterol                                        | 222284      | -6.0757    | -8.7            | -7.38785   | 1.85566033 |
| $\gamma$ -sitosterol                                   | 457801      | -6.0751    | -8.6            | -7.33755   | 1.78537391 |
| Phytosterols                                           | 12303662    | -5.9621    | -8.7            | -7.33105   | 1.93598766 |
| Fexofenadine                                           | 3348        | -6.5221    | -8.1            | -7.31105   | 1.11574379 |
| Alpha-tocotrienol                                      | 5282347     | -6.8213    | -7.8            | -7.31065   | 0.69204541 |
| Cholecalciferol                                        | 5280795     | -6.0886    | -8.5            | -7.2943    | 1.70511729 |
| Solanidine                                             | 65727       | -5.3695    | -9.1            | -7.23475   | 2.63786185 |
| Hecogenin                                              | 91453       | -5.1831    | -9              | -7.09155   | 2.69895587 |
| Apigenin-7-O-glucoside                                 | 44257792    | -5.8843    | -7.9            | -6.89215   | 1.42531514 |
| Neoxanthin                                             | 5282217     | -7.1123    | -6.6            | -6.85615   | 0.3622508  |
| Piperine                                               | 638024      | -5.409     | -8              | -6.7045    | 1.83211367 |
| 8-dehydrogingerdione                                   | 131752598   | -6.2961    | -7.1            | -6.69805   | 0.56844314 |
| 6-aminochrysene                                        | 17534       | -4.4932    | -8.8            | -6.6466    | 3.04536749 |
| Chlorogenic acid                                       | 1794427     | -5.9669    | -7.3            | -6.63345   | 0.94264405 |
| 3,4-dimethoxychalcone                                  | 5354494     | -5.3228    | -7.9            | -6.6114    | 1.8223556  |
| 10-gingerdione                                         | 5317591     | -6.255     | -6.9            | -6.5775    | 0.45608387 |
| Estra-1,3,5(10)-trien-17B-ol                           | 9811784     | -4.7996    | -8.3            | -6.5498    | 2.47515658 |
| Carnosol                                               | 442009      | -5.2475    | -7.8            | -6.52375   | 1.80489006 |
| Dicaffeoylquinic acid                                  | 12358846    | -6.838     | -6.2            | -6.519     | 0.45113413 |
| 4-O-Caffeoylquinic acid                                | 58427569    | -5.8592    | -7.1            | -6.4796    | 0.87737809 |
| Epicatechin gallate                                    | 107905      | -5.6161    | -7.3            | -6.45805   | 1.19069711 |
| Caffeoylquinic acid                                    | 10155076    | -5.6958    | -7.2            | -6.4479    | 1.06363002 |
| Epigallocatechin gallate                               | 65064       | -5.6623    | -7.2            | -6.43115   | 1.0873181  |
| Sitosterol- $\beta$ -D-glucoside                       | 91884650    | -6.5006    | -6.3            | -6.4003    | 0.14184562 |
| Farnesylacetone                                        | 1711945     | -5.8731    | -6.9            | -6.38655   | 0.72612795 |
| Amentoflavone                                          | 5281600     | -5.9243    | -6.8            | -6.36215   | 0.61921341 |
| Loratadine                                             | 3957        | -5.2159    | -7.5            | -6.35795   | 1.6151026  |
| Apoatropine                                            | 64695       | -5.4616    | -7.2            | -6.3308    | 1.22923443 |
| Arachidonic acid                                       | 444899      | -6.3373    | -6.3            | -6.31865   | 0.02637508 |
| Incensole oxide                                        | 90470329    | -5.12      | -7.5            | -6.31      | 1.68291414 |
| Caffeoyl feruloyl tartaric acid                        | 129724266   | -5.9103    | -6.7            | -6.30515   | 0.55840223 |
| Flavone                                                | 10680       | -4.8753    | -7.7            | -6.28765   | 1.99736452 |
| Quercetin dihexoside                                   | 5320835     | -6.3459    | -6.2            | -6.27295   | 0.10316688 |
| Linolenic acid                                         | 5280934     | -5.8042    | -6.7            | -6.2521    | 0.63342625 |
| [1,1-Bicyclopropyl-2-octanoic acid 2hexyl-methyl ester | 50930793    | -6.1551    | -6.3            | -6.22755   | 0.10245977 |

|                                      |           |         |      |          |            |
|--------------------------------------|-----------|---------|------|----------|------------|
| Anthocyanins                         | 145858    | -4.4443 | -8   | -6.22215 | 2.51425958 |
| Convolvamine                         | 420422    | -5.5266 | -6.9 | -6.2133  | 0.97114045 |
| Integerrimine                        | 5281733   | -4.9231 | -7.5 | -6.21155 | 1.82214346 |
| Isopilosine                          | 72312     | -5.3142 | -7.1 | -6.2071  | 1.26275129 |
| Phytol                               | 5280435   | -6.1094 | -6.3 | -6.2047  | 0.13477455 |
| Pukateine                            | 442340    | -4.5964 | -7.8 | -6.1982  | 2.26528728 |
| Luteolin                             | 5280445   | -5.1558 | -7.2 | -6.1779  | 1.44546768 |
| Neochlorogenic acid                  | 5280633   | -5.8372 | -6.5 | -6.1686  | 0.46867037 |
| Flavan                               | 94156     | -4.6058 | -7.7 | -6.1529  | 2.1879298  |
| $\beta$ - Sesquiphellandrene         | 519764    | -5.3973 | -6.9 | -6.14865 | 1.06256936 |
| Neophytadiene                        | 10446     | -5.8931 | -6.4 | -6.14655 | 0.35843243 |
| Homatropine                          | 5282593   | -5.391  | -6.9 | -6.1455  | 1.06702413 |
| Isorhamnetin 3-O-rutinoside          | 5481663   | -6.2764 | -6   | -6.1382  | 0.19544431 |
| Dihydrokavain                        | 10220256  | -5.1578 | -7.1 | -6.1289  | 1.37334279 |
| Pterostilbene                        | 5281727   | -5.4191 | -6.8 | -6.10955 | 0.97644375 |
| Crysoeriol                           | 5280666   | -5.0917 | -7.1 | -6.09585 | 1.42008255 |
| 4-shogaol                            | 9794897   | -5.6454 | -6.5 | -6.0727  | 0.60429346 |
| Isorhamnetin rutinoside              | 133562525 | -6.4382 | -5.7 | -6.0691  | 0.52198623 |
| Apigenin                             | 5280443   | -4.9978 | -7.1 | -6.0489  | 1.48647988 |
| Isorhamnetin                         | 5281654   | -5.3939 | -6.7 | -6.04695 | 0.92355217 |
| Podocarpic acid                      | 93017     | -4.5656 | -7.5 | -6.0328  | 2.07493414 |
| Kaempferol-3-rutinoside              | 5318767   | -6.0868 | -5.9 | -5.9934  | 0.13208755 |
| Isolariciresinol                     | 160521    | -5.2855 | -6.7 | -5.99275 | 1.00020254 |
| ar-Curcumene                         | 92139     | -5.0782 | -6.9 | -5.9891  | 1.28820713 |
| 7 $\beta$ -Hydroxy-sitosterol        | 12309569  | -6.0482 | -5.9 | -5.9741  | 0.10479322 |
| Incensole oxide acetate              | 73755086  | -5.3141 | -6.6 | -5.95705 | 0.90926861 |
| $\beta$ -Bisabolene                  | 10104370  | -4.9702 | -6.9 | -5.9351  | 1.36457467 |
| 9-Hydroxy-10,12-octadecadienoic acid | 1927      | -5.6493 | -6.2 | -5.92465 | 0.3894037  |
| Benzyl salicilate                    | 8363      | -4.9442 | -6.9 | -5.9221  | 1.38295944 |
| Palmitic acid                        | 985       | -5.8237 | -6   | -5.91185 | 0.12466293 |
| Naringenin                           | 932       | -4.9156 | -6.9 | -5.9078  | 1.4031827  |
| Ursolic acid                         | 64945     | -5.6005 | -6.2 | -5.90025 | 0.42391052 |
| Kaempferol                           | 5280863   | -4.9907 | -6.8 | -5.89535 | 1.2793683  |
| Palmitoleic acid                     | 445638    | -5.6874 | -6.1 | -5.8937  | 0.29175226 |
| $\alpha$ -Copaene-8-ol               | 25086830  | -4.9863 | -6.8 | -5.89315 | 1.28247957 |
| $\alpha$ -Humulene                   | 5281520   | -4.7726 | -7   | -5.8863  | 1.57500964 |
| $\beta$ - Vetivenene                 | 14475467  | -4.6601 | -7.1 | -5.88005 | 1.72526984 |
| $\alpha$ -Copaene                    | 442355    | -4.7449 | -7   | -5.87245 | 1.5945965  |
| cis-10-Heptadecenoic acid            | 5312435   | -5.9435 | -5.8 | -5.87175 | 0.10146982 |
| Farnesol                             | 445070    | -5.3238 | -6.4 | -5.8619  | 0.76098832 |
| Quercetin rhamnoside                 | 15939939  | -5.5134 | -6.2 | -5.8567  | 0.48549952 |

|                                                                       |          |         |      |          |            |
|-----------------------------------------------------------------------|----------|---------|------|----------|------------|
| (+)-Neo-olivil                                                        | 9976812  | -5.3091 | -6.4 | -5.85455 | 0.77138279 |
| Caffeoylmalic acid                                                    | 6124299  | -5.3076 | -6.4 | -5.8538  | 0.77244345 |
| Eleutheroside B                                                       | 5316860  | -5.9924 | -5.7 | -5.8462  | 0.20675802 |
| Hexahydrofarnesylacetone                                              | 10408    | -5.8855 | -5.8 | -5.84275 | 0.06045763 |
| Doxepin                                                               | 3158     | -4.9623 | -6.7 | -5.83115 | 1.22873945 |
| Kavain                                                                | 5281565  | -4.9584 | -6.7 | -5.8292  | 1.23149717 |
| Deoxyharringtonine                                                    | 285342   | -5.5562 | -6.1 | -5.8281  | 0.38452467 |
| $\delta$ -Cadinene                                                    | 441005   | -4.7456 | -6.9 | -5.8228  | 1.52339085 |
| Feruloyl malate                                                       | 71694479 | -5.3202 | -6.3 | -5.8101  | 0.69282322 |
| $\beta$ -Selinene                                                     | 442393   | -4.6981 | -6.9 | -5.79905 | 1.55697842 |
| Isorhamnetin-3-O-glucoside                                            | 5318645  | -5.5906 | -6   | -5.7953  | 0.28948952 |
| 6-benzylaminopurine                                                   | 62389    | -4.3875 | -7.2 | -5.79375 | 1.98873782 |
| Myristoleic acid                                                      | 5281119  | -5.5859 | -6   | -5.79295 | 0.29281292 |
| Heptadecanoic acid                                                    | 10465    | -5.9788 | -5.6 | -5.7894  | 0.26785205 |
| Secoisolariciresinol                                                  | 65373    | -5.7776 | -5.8 | -5.7888  | 0.01583919 |
| $\beta$ -Caryophyllene                                                | 5281515  | -4.8524 | -6.7 | -5.7762  | 1.30645049 |
| Genistein                                                             | 5280961  | -4.8508 | -6.7 | -5.7754  | 1.30758186 |
| 1,2-Diguaiacyl-1,3-propanediol                                        | 6426042  | -5.1505 | -6.4 | -5.77525 | 0.88352992 |
| Kaempferol rhamnoside                                                 | 5835713  | -5.436  | -6.1 | -5.768   | 0.4695189  |
| $\alpha$ -Selinene                                                    | 10856614 | -4.7329 | -6.8 | -5.76645 | 1.46166043 |
| Quercetin                                                             | 5280343  | -5.1021 | -6.4 | -5.75105 | 0.91775389 |
| Catechin hydrate                                                      | 107957   | -5.1846 | -6.3 | -5.7423  | 0.7887069  |
| Caffeoyl tartaric acid                                                | 9857913  | -5.3824 | -6.1 | -5.7412  | 0.50741983 |
| Myricetin                                                             | 5281672  | -5.1685 | -6.3 | -5.73425 | 0.80009132 |
| Isopropyl dodecanoate                                                 | 25068    | -5.5619 | -5.9 | -5.73095 | 0.2390728  |
| 2H-Indeno[1,2-b]furan-2-one, 3,3a,4,5,6,7,8,8b-octahydro-8,8-dimethyl | 605626   | -4.4332 | -7   | -5.7166  | 1.81500169 |
| $\alpha$ -Longipinene                                                 | 520957   | -4.8302 | -6.6 | -5.7151  | 1.25143758 |
| $\gamma$ -Cadinene                                                    | 92313    | -4.706  | -6.7 | -5.703   | 1.40997092 |
| Methyl palmitate                                                      | 8181     | -5.9944 | -5.4 | -5.6972  | 0.42030427 |
| Geranyl acetone                                                       | 1549778  | -5.0838 | -6.3 | -5.6919  | 0.85998327 |
| Abscisic acid                                                         | 5375199  | -4.7747 | -6.6 | -5.68735 | 1.29068201 |
| Epicatechin                                                           | 72276    | -4.814  | -6.5 | -5.657   | 1.19218203 |
| Quercetin-3-O-glucoside                                               | 25203368 | -5.4126 | -5.9 | -5.6563  | 0.34464385 |
| Osthole                                                               | 10228    | -4.6725 | -6.6 | -5.63625 | 1.36294832 |
| Caryophyllene oxide                                                   | 1742210  | -4.5483 | -6.7 | -5.62415 | 1.52148166 |
| Kaempferol-3-O-glucoside                                              | 5282102  | -5.4427 | -5.8 | -5.62135 | 0.25264925 |
| (E)-Geranyl acetone                                                   | 1713001  | -5.1202 | -6.1 | -5.6101  | 0.69282322 |
| Bornyl acetate                                                        | 6448     | -4.6168 | -6.6 | -5.6084  | 1.40233417 |

|                                                              |           |          |      |           |            |
|--------------------------------------------------------------|-----------|----------|------|-----------|------------|
| 1-Hydroxy-1-(4-hydroxyphenyl)-2-propanone                    | 10261435  | -5.5086  | -5.7 | -5.6043   | 0.13534024 |
| Catechin                                                     | 9064      | -4.9065  | -6.3 | -5.60325  | 0.9853533  |
| Kaempferol pentoside                                         | 14749097  | -5.1918  | -6   | -5.5959   | 0.5714837  |
| Quercitrin                                                   | 5280459   | -5.2485  | -5.9 | -5.57425  | 0.46068007 |
| $\beta$ -Bourbonene                                          | 62566     | -4.4423  | -6.7 | -5.57115  | 1.59643498 |
| Quercetin-3-glucoside                                        | 5280804   | -5.2398  | -5.9 | -5.5699   | 0.4668319  |
| Myristic acid                                                | 11005     | -5.50003 | -5.6 | -5.550015 | 0.07068946 |
| Diphenyl                                                     | 7095      | -4.2435  | -6.8 | -5.52175  | 1.80771849 |
| Peonidin 3-O-rutinoside                                      | 44256842  | -5.932   | -5.1 | -5.516    | 0.58831284 |
| Arbutine                                                     | 440936    | -5.0019  | -6   | -5.50095  | 0.70576328 |
| Bioallethrin                                                 | 15558638  | -5.413   | -5.5 | -5.4565   | 0.06151829 |
| Harmine                                                      | 5280953   | -4.5792  | -6.3 | -5.4396   | 1.21678935 |
| 4-methyl-7-ethoxycoumarin                                    | 66595     | -4.5872  | -6.2 | -5.3936   | 1.14042182 |
| Rutin                                                        | 5280805   | -5.976   | -4.8 | -5.388    | 0.83155757 |
| 1-Methyl naphthalene                                         | 7002      | -4.0664  | -6.7 | -5.3832   | 1.86223642 |
| Calamenene                                                   | 6429077   | -4.5427  | -6.2 | -5.37135  | 1.17188807 |
| Carvacryl acetate                                            | 80792     | -4.6375  | -6.1 | -5.36875  | 1.03414367 |
| Isotachioside                                                | 15098566  | -5.0276  | -5.7 | -5.3638   | 0.4754586  |
| Harmol                                                       | 68094     | -4.3052  | -6.4 | -5.3526   | 1.48124729 |
| 4-(3-Hydroxy-1-butyn-1-yl)-3,5,5-trimethyl-2-cyclohexen-1-ol | 5280654   | -4.6033  | -6.1 | -5.35165  | 1.05832672 |
| Dibutyl phthalate                                            | 3026      | -5.2871  | -5.4 | -5.34355  | 0.07983236 |
| $\alpha$ -Ionone                                             | 5282108   | -4.6817  | -6   | -5.34085  | 0.93217887 |
| Shikimic acid                                                | 8742      | -4.3748  | -6.3 | -5.3374   | 1.36132198 |
| 4-methylmethoxycoumarin                                      | 223821    | -4.4742  | -6.2 | -5.3371   | 1.22032488 |
| p-Coumaroylmalic acid                                        | 129720114 | -4.97    | -5.7 | -5.335    | 0.51618795 |
| 1-Dodecanamine, N, N-dimethyl                                | 8168      | -5.3427  | -5.3 | -5.32135  | 0.03019346 |
| Carvylacetate                                                | 7335      | -4.9298  | -5.7 | -5.3149   | 0.54461364 |
| $\alpha$ -Terpinyl acetate                                   | 111037    | -4.6231  | -6   | -5.31155  | 0.97361533 |
| 3-Hydroxy-damascone                                          | 5366075   | -4.8226  | -5.8 | -5.3113   | 0.69112617 |
| Adenosine                                                    | 60961     | -4.9112  | -5.7 | -5.3056   | 0.55776583 |
| Tachioside                                                   | 11962143  | -4.7943  | -5.8 | -5.29715  | 0.71113729 |
| Dodecendioic acid                                            | 5283028   | -5.0907  | -5.5 | -5.29535  | 0.28941881 |
| 9-amino-camptothecin                                         | 72402     | -5.0602  | -5.5 | -5.2801   | 0.31098556 |
| Silane, triethyl(2-phenylethoxy)                             | 610043    | -5.5421  | -5   | -5.27105  | 0.38332259 |
| O-Feruloyl quinic acid                                       | 10177048  | -5.8282  | -4.7 | -5.2641   | 0.79775787 |
| Hydrocotarnine                                               | 3646      | -4.3891  | -6.1 | -5.24455  | 1.20978899 |

|                                                               |          |          |      |          |            |
|---------------------------------------------------------------|----------|----------|------|----------|------------|
| DL-methyl-m-tyrosine                                          | 2110     | -4.6843  | -5.8 | -5.24215 | 0.78891904 |
| Cinnamyl acetate                                              | 5282110  | -4.6839  | -5.8 | -5.24195 | 0.78920188 |
| $\beta$ -Ionone                                               | 638014   | -4.3642  | -6.1 | -5.2321  | 1.22739595 |
| Lauric acid                                                   | 3893     | -5.0462  | -5.4 | -5.2231  | 0.25017438 |
| 4-(4-Hydroxy-2,6,6-trimethyl-1-cyclohexen-1-yl)-3-buten-2-one | 538953   | -4.5395  | -5.9 | -5.21975 | 0.96201878 |
| 1,2-Benzenedicarboxylic acid                                  | 90531    | -5.1265  | -5.3 | -5.21325 | 0.12268303 |
| Safranal                                                      | 61041    | -4.397   | -6   | -5.1985  | 1.13349217 |
| 4-aminoantipyrine                                             | 2151     | -4.4812  | -5.9 | -5.1906  | 1.0032431  |
| Carvone                                                       | 7439     | -4.4656  | -5.9 | -5.1828  | 1.01427397 |
| Cinnamide                                                     | 5273472  | -4.4598  | -5.9 | -5.1799  | 1.01837519 |
| Linalool                                                      | 6549     | -4.4213  | -5.9 | -5.16065 | 1.0455988  |
| 4-Acetyl-2-methylphenol                                       | 70135    | -4.4034  | -5.9 | -5.1517  | 1.05825601 |
| 3,4-Dimethyl-5-pentylidene-2(5H)-furanone                     | 6433214  | -4.5843  | -5.7 | -5.14215 | 0.78891904 |
| Quinic acid                                                   | 6508     | -4.0803  | -6.2 | -5.14015 | 1.49885424 |
| Phenylalanine                                                 | 6140     | -4.458   | -5.8 | -5.129   | 0.9489373  |
| Carvacrol                                                     | 10364    | -4.3578  | -5.9 | -5.1289  | 1.09050008 |
| 3,4-Dimethyl-5-pentylfuran-2(5H)-one                          | 13192443 | -4.6535  | -5.6 | -5.12675 | 0.66927657 |
| 2(3H)-Naphthalenone, 4,4a,5,6,7,8- hexahydro-1-methoxy        | 534313   | -4.4365  | -5.8 | -5.11825 | 0.9641401  |
| Methylcoumarin                                                | 17130    | -4.0304  | -6.2 | -5.1152  | 1.53413887 |
| 3-Oxo-a-ionol                                                 | 5370052  | -4.49444 | -5.7 | -5.09722 | 0.85245965 |
| Camphor                                                       | 2537     | -4.2732  | -5.9 | -5.0866  | 1.15032131 |
| Carnosine                                                     | 439224   | -4.8235  | -5.3 | -5.06175 | 0.33693638 |
| n-acetyl-L-glutamine                                          | 182230   | -4.4877  | -5.6 | -5.04385 | 0.78651487 |
| Umbelliferone                                                 | 5281426  | -4.2833  | -5.8 | -5.04165 | 1.07246886 |
| 2-Pentylfuran                                                 | 19602    | -4.3619  | -5.7 | -5.03095 | 0.94617958 |
| Thymol                                                        | 6989     | -4.3415  | -5.7 | -5.02075 | 0.96060456 |
| Cinnamic acid                                                 | 444539   | -4.2413  | -5.8 | -5.02065 | 1.10216734 |
| 1,2-O-isopropylidene-D-glucoside                              | 87704    | -4.729   | -5.3 | -5.0145  | 0.40375797 |
| Levulinic acid                                                | 11579    | -4.6258  | -5.4 | -5.0129  | 0.54744207 |
| Naphthalene                                                   | 931      | -3.9013  | -6.1 | -5.00065 | 1.55471568 |
| p-Cymene                                                      | 7463     | -4.1664  | -5.8 | -4.9832  | 1.15512964 |
| Borneol                                                       | 64685    | -4.4565  | -5.5 | -4.97825 | 0.73786593 |
| Caffeic acid                                                  | 689043   | -4.4034  | -5.5 | -4.9517  | 0.7754133  |
| Esculetin                                                     | 5281416  | -4.2483  | -5.6 | -4.92415 | 0.95579624 |
| Hydroxycinnamaldehyde                                         | 71407359 | -4.2442  | -5.6 | -4.9221  | 0.95869537 |

|                                               |          |         |      |          |            |
|-----------------------------------------------|----------|---------|------|----------|------------|
| Anthranilic acid methyl ester                 | 8635     | -4.2379 | -5.6 | -4.91895 | 0.96315015 |
| $\alpha$ - Terpineol                          | 17100    | -4.3346 | -5.5 | -4.9173  | 0.82406224 |
| 2-Heptanone                                   | 8051     | -4.3068 | -5.5 | -4.9034  | 0.84371981 |
| 3-Octanone                                    | 246728   | -4.1028 | -5.7 | -4.9014  | 1.12939095 |
| Citric acid                                   | 311      | -4.098  | -5.7 | -4.899   | 1.13278506 |
| Methyl eugenol                                | 7127     | -4.5654 | -5.2 | -4.8827  | 0.44872996 |
| Heptanal                                      | 8130     | -4.4647 | -5.3 | -4.88235 | 0.59064629 |
| $\beta$ -Homocyclocitral                      | 61124    | -4.4497 | -5.3 | -4.87485 | 0.6012529  |
| Acetophenone                                  | 7410     | -4.2438 | -5.5 | -4.8719  | 0.88826754 |
| Methyl chavicol                               | 8815     | -4.4351 | -5.3 | -4.86755 | 0.61157666 |
| Lotaustralin                                  | 441467   | -4.6284 | -5.1 | -4.8642  | 0.33347156 |
| 2,4,6-Trimethyl-5H-1,3,5-dithiazine           | 12518    | -4.0211 | -5.7 | -4.86055 | 1.18716157 |
| Nonanal                                       | 31289    | -4.4989 | -5.2 | -4.84945 | 0.49575256 |
| Phosphatidylcholine                           | 10425706 | -5.2752 | -4.4 | -4.8376  | 0.61885985 |
| Succinic acid                                 | 1110     | -4.3727 | -5.3 | -4.83635 | 0.65570012 |
| 3,4-Dihydroxybenzoic acid                     | 72       | -4.1666 | -5.5 | -4.8333  | 0.94285618 |
| Decanal                                       | 8175     | -4.7648 | -4.9 | -4.8324  | 0.09560084 |
| L-2-aminoadipic acid                          | 92136    | -4.1413 | -5.5 | -4.82065 | 0.96074598 |
| Indole                                        | 798      | -4.0359 | -5.6 | -4.81795 | 1.10598572 |
| Ferulic acid                                  | 445858   | -4.3353 | -5.3 | -4.81765 | 0.68214591 |
| p-hydroxybenzoic acid                         | 135      | -3.9341 | -5.7 | -4.81705 | 1.24867986 |
| Salicylic alcohol                             | 5146     | -4.4245 | -5.2 | -4.81225 | 0.54836131 |
| Benzofuran, 2,3,-dihydro                      | 10329    | -4.1214 | -5.5 | -4.8107  | 0.97481741 |
| Cumin aldehyde                                | 326      | -4.2134 | -5.4 | -4.8067  | 0.83905291 |
| Gentisic acid                                 | 3469     | -4.3071 | -5.3 | -4.80355 | 0.70208632 |
| Indole-3-carboxaldehyde                       | 10256    | -3.8933 | -5.7 | -4.79665 | 1.27752982 |
| 2-(1-Pentenyl)furan                           | 5369956  | -4.5891 | -5   | -4.79455 | 0.29055018 |
| $\beta$ -Cyclocitral                          | 9895     | -4.2793 | -5.3 | -4.78965 | 0.72174389 |
| n-Octanal                                     | 454      | -4.1711 | -5.4 | -4.78555 | 0.86896352 |
| (E)-Anethole                                  | 637563   | -4.2669 | -5.3 | -4.78345 | 0.73051202 |
| Coniferol                                     | 1549095  | -4.4331 | -5.1 | -4.76655 | 0.47156951 |
| Decan-2-one                                   | 12741    | -4.5272 | -5   | -4.7636  | 0.33432009 |
| p-coumaric acid                               | 637542   | -4.3004 | -5.2 | -4.7502  | 0.63611326 |
| p-Hydroxy-acetophenone                        | 7469     | -3.9972 | -5.5 | -4.7486  | 1.06264007 |
| Nonanol                                       | 8914     | -4.3941 | -5.1 | -4.74705 | 0.49914668 |
| Vitamin B5                                    | 6613     | -4.5861 | -4.9 | -4.74305 | 0.22196082 |
| Oxime- methoxy-phenyl                         | 9602988  | -3.9799 | -5.5 | -4.73995 | 1.07487302 |
| m-Hydroxy-acetophenone                        | 8487     | -4.079  | -5.4 | -4.7395  | 0.93408806 |
| Isopropyl- $\beta$ -D-thio-galacto-pyranoside | 656894   | -4.5687 | -4.9 | -4.73435 | 0.23426448 |
| Aminobutyric acid                             | 119      | -4.6407 | -4.8 | -4.72035 | 0.11264211 |
| 2-acetylpyrrole                               | 14079    | -4.4069 | -5   | -4.70345 | 0.41938503 |

|                                                        |          |         |      |          |            |
|--------------------------------------------------------|----------|---------|------|----------|------------|
| Homovanillyl alcohol                                   | 16928    | -4.4777 | -4.9 | -4.68885 | 0.29861119 |
| Scopoletin                                             | 5280460  | -4.1664 | -5.2 | -4.6832  | 0.73086557 |
| Histidinol                                             | 776      | -3.9471 | -5.4 | -4.67355 | 1.02735544 |
| Glutaric acid                                          | 743      | -3.9466 | -5.4 | -4.6733  | 1.027709   |
| Synephrine                                             | 7172     | -4.3459 | -5   | -4.67295 | 0.46251855 |
| 2-deoxy-D-ribose                                       | 5460005  | -4.3193 | -5   | -4.65965 | 0.48132759 |
| Phthalic acid                                          | 1017     | -3.807  | -5.5 | -4.6535  | 1.19713178 |
| Eugenol                                                | 3314     | -4.1972 | -5.1 | -4.6486  | 0.638376   |
| 4-Vinyl guaiacol                                       | 332      | -4.2574 | -5   | -4.6287  | 0.5250975  |
| Sinapic acid                                           | 637775   | -4.2393 | -5   | -4.61965 | 0.53789613 |
| Vanillic acid                                          | 8468     | -4.0338 | -5.1 | -4.5669  | 0.75391725 |
| DL-a aminopimelic acid                                 | 101122   | -4.519  | -4.6 | -4.5595  | 0.05727565 |
| Glucosamine                                            | 439213   | -4.4125 | -4.7 | -4.55625 | 0.2032932  |
| Resorcinol                                             | 5054     | -4.0108 | -5.1 | -4.5554  | 0.77018071 |
| Gallic acid                                            | 370      | -4.0073 | -5.1 | -4.55365 | 0.77265558 |
| 5,6-Dihydro-4-pentyl- 2,6-dimethyl-4H-1,3,5-dithiazine | 528360   | -4.3059 | -4.8 | -4.55295 | 0.34938146 |
| Tyrosol                                                | 10393    | -4.1039 | -5   | -4.55195 | 0.63363839 |
| 4-deoxypyridoxine                                      | 6094     | -4.1868 | -4.9 | -4.5434  | 0.50430856 |
| Sinapyl alcohol                                        | 5280507  | -4.3737 | -4.7 | -4.53685 | 0.23072894 |
| p-Hydroxy-benzaldehyde                                 | 126      | -3.941  | -5.1 | -4.5205  | 0.81953676 |
| p-Hydroxybenzyl alcohol                                | 125      | -4.1211 | -4.9 | -4.51055 | 0.55076547 |
| Rhamnose                                               | 25310    | -4.2847 | -4.7 | -4.49235 | 0.29366145 |
| Leucine                                                | 6106     | -4.0817 | -4.9 | -4.49085 | 0.57862548 |
| Benzaldehyde                                           | 240      | -3.9238 | -5   | -4.4619  | 0.76098832 |
| Anisaldehyde                                           | 31244    | -4.2212 | -4.7 | -4.4606  | 0.33856273 |
| 2,6-Dimethoxy-hydroquinone                             | 96038    | -4.3788 | -4.5 | -4.4394  | 0.08570134 |
| Niacinamide                                            | 936      | -3.971  | -4.9 | -4.4355  | 0.6569022  |
| 2, 6,-Nonadienal, 3, 7-dimethyl                        | 5364526  | -4.627  | -4.2 | -4.4135  | 0.3019346  |
| Syringic acid                                          | 10742    | -4.126  | -4.7 | -4.413   | 0.40587929 |
| 3-hydroxy-2,3 dihydromaltol                            | 119838   | -4.1258 | -4.7 | -4.4129  | 0.40602071 |
| Hexanal                                                | 6184     | -3.7988 | -4.9 | -4.3494  | 0.77866599 |
| 6-azacytosine                                          | 70265    | -4.0896 | -4.6 | -4.3448  | 0.3609073  |
| adenine                                                | 190      | -3.8392 | -4.8 | -4.3196  | 0.6793882  |
| Pyrogallol                                             | 1057     | -3.8293 | -4.8 | -4.31465 | 0.68638855 |
| 1,6-dioxaspiro[4.4]non-3-ene                           | 10374471 | -3.8591 | -4.7 | -4.27955 | 0.59460609 |
| Galactal                                               | 2734735  | -4.2054 | -4.3 | -4.2527  | 0.0668923  |
| Arabitol                                               | 94154    | -3.9831 | -4.5 | -4.24155 | 0.3655035  |
| Levoglucosan                                           | 2724705  | -3.9712 | -4.5 | -4.2356  | 0.37391807 |

|                                |         |         |      |          |            |
|--------------------------------|---------|---------|------|----------|------------|
| Dimethyl-L-tartrate            | 11851   | -4.3304 | -4   | -4.1652  | 0.23362808 |
| 1,4-benzoquinone               | 4650    | -3.7921 | -4.5 | -4.14605 | 0.50056089 |
| Mannitol                       | 6251    | -4.3322 | -3.9 | -4.1161  | 0.30561155 |
| Creatinine                     | 588     | -3.7676 | -4.3 | -4.0338  | 0.37646365 |
| Proline                        | 145742  | -3.8125 | -4.2 | -4.00625 | 0.27400388 |
| 1, 2, 3-Butanetriol            | 20497   | -3.6646 | -4.3 | -3.9823  | 0.44929565 |
| L-threonine                    | 6288    | -3.7288 | -4.2 | -3.9644  | 0.33318872 |
| 3,5-Dimethyl-1,2,4-trithiolane | 32033   | -4.1077 | -3.5 | -3.80385 | 0.42970879 |
| Choline                        | 305     | -3.8757 | -3.2 | -3.53785 | 0.47779205 |
| Formic acid                    | 284     | -2.905  | -2.7 | -2.8025  | 0.14495689 |
| Lutein                         | 5281243 | 5.8577  | -6.4 | -0.27115 | 8.66750279 |
| Violaxanthin                   | 448438  | 14.2916 | -6.4 | 3.9458   | 14.6311707 |
| $\beta$ -carotene              | 5280489 | 14.7245 | -6.3 | 4.21225  | 14.8665665 |

**Table S2.** UD Phytochemicals docking values against NKR1. Values in kcal/mol.

| Phytochemical                    | PubChem CID | Moe Result | AutoVina Result | Mean value | Deviation  |
|----------------------------------|-------------|------------|-----------------|------------|------------|
| Amentoflavone                    | 5281600     | -8.2097    | -11             | -9.60485   | 1.97304005 |
| aprepitant                       | 135413536   | -7.6781    | -10.4           | -9.03905   | 1.92467395 |
| Peonidin 3-O-rutinoside          | 44256842    | -7.8534    | -9.3            | -8.5767    | 1.02290067 |
| Isorhamnetin 3-O-rutinoside      | 5481663     | -8.2394    | -8.8            | -8.5197    | 0.39640406 |
| Quercitrin                       | 5280459     | -7.5104    | -9.4            | -8.4552    | 1.33614897 |
| Quercetin dihexoside             | 5320835     | -7.841     | -9              | -8.4205    | 0.81953676 |
| Kaempferol-3-rutinoside          | 5318767     | -7.7085    | -9.1            | -8.40425   | 0.98393909 |
| Alpha-tocotrienol                | 5282347     | -7.8049    | -9              | -8.40245   | 0.84506331 |
| Isorhamnetin-3-O-glucoside       | 5318645     | -7.3334    | -9.4            | -8.3667    | 1.46130687 |
| Quercetin-3-O-glucoside          | 25203368    | -7.3537    | -9              | -8.17685   | 1.16410989 |
| Quercetin-3-glucoside            | 5280804     | -7.5809    | -8.7            | -8.14045   | 0.7913232  |
| Dicaffeoylquinic acid            | 12358846    | -7.5571    | -8.7            | -8.12855   | 0.80815234 |
| Neoxanthin                       | 5282217     | -7.129     | -8.8            | -7.9645    | 1.18157543 |
| 7 $\alpha$ -Hydroxy sitosterol   | 161816      | -6.6276    | -9.3            | -7.9638    | 1.88967216 |
| Hecogenin                        | 91453       | -6.3077    | -9.6            | -7.95385   | 2.32800766 |
| Sitosterol- $\beta$ -D-glucoside | 91884650    | -7.1062    | -8.8            | -7.9531    | 1.19769747 |
| Quercetin rhamnoside             | 15939939    | -7.2971    | -8.6            | -7.94855   | 0.92128943 |
| Kaempferol-3-O-glucoside         | 5282102     | -7.3247    | -8.5            | -7.91235   | 0.8310626  |
| Lutein                           | 5281243     | -7.9512    | -7.8            | -7.8756    | 0.10691455 |
| Caffeoyl feruloyl tartaric acid  | 129724266   | -7.8099    | -7.9            | -7.85495   | 0.06371032 |



|                                                        |           |         |      |          |            |
|--------------------------------------------------------|-----------|---------|------|----------|------------|
| Epigallocatechin gallate                               | 65064     | -6.7522 | -8.9 | -7.8261  | 1.51872394 |
| Isorhamnetin rutinoside                                | 133562525 | -7.3297 | -8.3 | -7.81485 | 0.68610571 |
| Apigenin-7-O-glucoside                                 | 44257792  | -6.7707 | -8.8 | -7.78535 | 1.43493179 |
| $\gamma$ -sitosterol                                   | 457801    | -6.5771 | -8.9 | -7.73855 | 1.64253834 |
| Kaempferol rhamnoside                                  | 5835713   | -7.0723 | -8.4 | -7.73615 | 0.93882567 |
| 7 $\beta$ -Hydroxy-sitosterol                          | 12309569  | -6.6034 | -8.8 | -7.7017  | 1.55323076 |
| $\beta$ -carotene                                      | 5280489   | -7.6738 | -7.7 | -7.6869  | 0.0185262  |
| Cholecalciferol                                        | 5280795   | -6.8957 | -8.4 | -7.64785 | 1.06370073 |
| Violaxanthin                                           | 448438    | -8.1867 | -7   | -7.59335 | 0.83912362 |
| Beta-Sitosterol                                        | 222284    | -6.3332 | -8.8 | -7.5666  | 1.74429101 |
| Phytosterols                                           | 12303662  | -6.2539 | -8.8 | -7.52695 | 1.80036458 |
| Kaempferol pentoside                                   | 14749097  | -6.5829 | -8.4 | -7.49145 | 1.28488373 |
| 9-amino-camptothecin                                   | 72402     | -5.8327 | -9   | -7.41635 | 2.23961931 |
| Solanidine                                             | 65727     | -5.4999 | -9.2 | -7.34995 | 2.6163658  |
| Pukateine                                              | 442340    | -5.7947 | -8.9 | -7.34735 | 2.19577869 |
| Epicatechin gallate                                    | 107905    | -6.4591 | -8.2 | -7.32955 | 1.2310022  |
| 6-aminochrysene                                        | 17534     | -5.2395 | -9.2 | -7.21975 | 2.80049641 |
| Deoxyharringtonine                                     | 285342    | -6.6155 | -7.8 | -7.20775 | 0.83756798 |
| 10-gingerdione                                         | 5317591   | -7.5926 | -6.8 | -7.1963  | 0.56045283 |
| Estra-1,3,5(10)-trien-17B-ol                           | 9811784   | -5.3792 | -9   | -7.1896  | 2.56029223 |
| Bioallethrin                                           | 15558638  | -6.7447 | -7.6 | -7.17235 | 0.60478843 |
| Isolariciresinol                                       | 160521    | -6.5878 | -7.7 | -7.1439  | 0.78644416 |
| Ursolic acid                                           | 64945     | -5.5652 | -8.7 | -7.1326  | 2.21663834 |
| Luteolin                                               | 5280445   | -6.027  | -8.1 | -7.0635  | 1.46583236 |
| Chlorogenic acid                                       | 1794427   | -6.7235 | -7.4 | -7.06175 | 0.47835774 |
| (+)-Neo-olivil                                         | 9976812   | -6.7121 | -7.4 | -7.05605 | 0.48641875 |
| 4-O-Caffeoylquinic acid                                | 58427569  | -6.2251 | -7.8 | -7.01255 | 1.11362247 |
| O-Feruloyl quinic acid                                 | 10177048  | -6.4243 | -7.6 | -7.01215 | 0.83134544 |
| Piperine                                               | 638024    | -5.9949 | -8   | -6.99745 | 1.41781981 |
| Safranal                                               | 61041     | -4.5541 | -9.4 | -6.97705 | 3.42656875 |
| Crysoeriol                                             | 5280666   | -5.9006 | -8   | -6.9503  | 1.48449998 |
| [1,1-Bicyclopropyl-2-octanoic acid 2hexyl-methyl ester | 50930793  | -7.2295 | -6.6 | -6.91475 | 0.44512372 |
| Neochlorogenic acid                                    | 5280633   | -6.0177 | -7.8 | -6.90885 | 1.26027642 |
| Secoisolariciresinol                                   | 65373     | -7.1729 | -6.6 | -6.88645 | 0.40510147 |
| Isopilosine                                            | 72312     | -6.2692 | -7.5 | -6.8846  | 0.87030703 |
| 1,2-Diguaiacyl-1,3-propanediol                         | 6426042   | -6.2579 | -7.5 | -6.87895 | 0.87829733 |
| Eleutheroside B                                        | 5316860   | -7.0342 | -6.7 | -6.8671  | 0.23631509 |
| Incensole oxide acetate                                | 73755086  | -6.8185 | -6.9 | -6.85925 | 0.0576292  |
| Caffeoylquinic acid                                    | 10155076  | -6.0562 | -7.6 | -6.8281  | 1.09163145 |
| Convolvamine                                           | 420422    | -6.509  | -7.1 | -6.8045  | 0.41790011 |

|                                                                       |           |         |      |          |            |
|-----------------------------------------------------------------------|-----------|---------|------|----------|------------|
| Epicatechin                                                           | 72276     | -5.8703 | -7.7 | -6.78515 | 1.29379328 |
| Farnesylacetone                                                       | 1711945   | -6.7688 | -6.8 | -6.7844  | 0.02206173 |
| Catechin                                                              | 9064      | -5.8533 | -7.7 | -6.77665 | 1.30581409 |
| Apigenin                                                              | 5280443   | -5.6352 | -7.9 | -6.7676  | 1.60145544 |
| Catechin hydrate                                                      | 107957    | -5.806  | -7.7 | -6.753   | 1.33926024 |
| 2H-Indeno[1,2-b]furan-2-one, 3,3a,4,5,6,7,8,8b-octahydro-8,8-dimethyl | 605626    | -5.7631 | -7.7 | -6.73155 | 1.36959512 |
| 3,4-dimethoxychalcone                                                 | 5354494   | -6.0573 | -7.4 | -6.72865 | 0.94943228 |
| Incensole oxide                                                       | 90470329  | -5.7429 | -7.7 | -6.72145 | 1.38387868 |
| Isorhamnetin                                                          | 5281654   | -5.9095 | -7.5 | -6.70475 | 1.12465334 |
| Apoatropine                                                           | 64695     | -5.6661 | -7.7 | -6.68305 | 1.43818448 |
| $\alpha$ -Humulene                                                    | 5281520   | -5.6232 | -7.7 | -6.6616  | 1.46851936 |
| Genistein                                                             | 5280961   | -5.52   | -7.8 | -6.66    | 1.61220346 |
| Myricetin                                                             | 5281672   | -6.0142 | -7.3 | -6.6571  | 0.9091979  |
| Naringenin                                                            | 932       | -5.5023 | -7.8 | -6.65115 | 1.62471925 |
| Quinic acid                                                           | 6508      | -4.2983 | -9   | -6.64915 | 3.32460395 |
| $\gamma$ -Cadinene                                                    | 92313     | -5.5976 | -7.7 | -6.6488  | 1.4866213  |
| Tachioside                                                            | 11962143  | -6.1929 | -7.1 | -6.64645 | 0.64141656 |
| Homatropine                                                           | 5282593   | -6.071  | -7.2 | -6.6355  | 0.79832356 |
| Caffeoyl tartaric acid                                                | 9857913   | -6.3708 | -6.9 | -6.6354  | 0.37420091 |
| Arachidonic acid                                                      | 444899    | -7.0676 | -6.2 | -6.6338  | 0.61348584 |
| $\delta$ -Cadinene                                                    | 441005    | -5.4153 | -7.8 | -6.60765 | 1.68623754 |
| Osthole                                                               | 10228     | -5.6051 | -7.6 | -6.60255 | 1.41060732 |
| Podocarpic acid                                                       | 93017     | -5.1965 | -7.9 | -6.54825 | 1.91166318 |
| Feruloyl malate                                                       | 71694479  | -6.3724 | -6.7 | -6.5362  | 0.23164818 |
| Abscisic acid                                                         | 5375199   | -5.2976 | -7.7 | -6.4988  | 1.69875333 |
| Carnosol                                                              | 442009    | -5.3967 | -7.6 | -6.49835 | 1.55796837 |
| $\beta$ -Bisabolene                                                   | 10104370  | -6.2887 | -6.7 | -6.49435 | 0.29083302 |
| Hexahydrofarnesylacetone                                              | 10408     | -6.5786 | -6.4 | -6.4893  | 0.12628927 |
| Isotachioside                                                         | 15098566  | -6.2779 | -6.7 | -6.48895 | 0.29846977 |
| Linolenic acid                                                        | 5280934   | -6.7772 | -6.2 | -6.4886  | 0.40814203 |
| Quercetin                                                             | 5280343   | -5.4736 | -7.5 | -6.4868  | 1.43288118 |
| Kaempferol                                                            | 5280863   | -5.5556 | -7.4 | -6.4778  | 1.30418775 |
| Flavone                                                               | 10680     | -5.3199 | -7.6 | -6.45995 | 1.61227417 |
| 8-dehydrogingerdione                                                  | 131752598 | -6.5904 | -6.3 | -6.4452  | 0.20534381 |
| $\beta$ -Bourbonene                                                   | 62566     | -5.0839 | -7.8 | -6.44195 | 1.92057273 |
| 4-(4-Hydroxy-2,6,6-trimethyl1-cyclohexen-1-yl)-3-buten-2-one          | 538953    | -5.658  | -7.2 | -6.429   | 1.09035866 |
| Integerrimine                                                         | 5281733   | -5.356  | -7.5 | -6.428   | 1.51603694 |
| Caffeoylmalic acid                                                    | 6124299   | -5.9523 | -6.9 | -6.42615 | 0.6701251  |
| 9-Hydroxy-10,12-octadecadienoic acid                                  | 1927      | -6.7009 | -6.1 | -6.40045 | 0.42490046 |

|                              |           |         |      |          |            |
|------------------------------|-----------|---------|------|----------|------------|
| Pterostilbene                | 5281727   | -5.7862 | -7   | -6.3931  | 0.85828621 |
| Calamenene                   | 6429077   | -5.239  | -7.5 | -6.3695  | 1.59876843 |
| Anthocyanins                 | 145858    | -5.1373 | -7.6 | -6.36865 | 1.74139187 |
| Farnesol                     | 445070    | -6.4892 | -6.2 | -6.3446  | 0.20449528 |
| Phytol                       | 5280435   | -6.3661 | -6.3 | -6.33305 | 0.04673976 |
| Dihydrokavain                | 10220256  | -5.4632 | -7.2 | -6.3316  | 1.22810306 |
| Dibutyl phthalate            | 3026      | -6.4139 | -6.2 | -6.30695 | 0.15125014 |
| 6-benzylaminopurine          | 62389     | -5.3962 | -7.2 | -6.2981  | 1.27547921 |
| $\alpha$ -Copaene            | 442355    | -4.8381 | -7.7 | -6.26905 | 2.0236689  |
| Flavan                       | 94156     | -5.0095 | -7.5 | -6.25475 | 1.76104944 |
| Neophytadiene                | 10446     | -6.3725 | -6.1 | -6.23625 | 0.1926866  |
| 4-shogaol                    | 9794897   | -5.8641 | -6.6 | -6.23205 | 0.52035988 |
| p-Coumaroylmalic acid        | 129720114 | -5.4941 | -6.9 | -6.19705 | 0.99412142 |
| cis-10-Heptadecenoic acid    | 5312435   | -6.6736 | -5.7 | -6.1868  | 0.68843916 |
| Harmine                      | 5280953   | -5.2467 | -7.1 | -6.17335 | 1.310481   |
| $\beta$ -Caryophyllene       | 5281515   | -4.8463 | -7.5 | -6.17315 | 1.87644927 |
| $\alpha$ -Copaene-8-ol       | 25086830  | -5.0054 | -7.3 | -6.1527  | 1.62252722 |
| Benzyl salicilate            | 8363      | -5.3017 | -7   | -6.15085 | 1.20087945 |
| $\alpha$ -Curcumene          | 92139     | -5.6346 | -6.6 | -6.1173  | 0.68264089 |
| Isopropyl dodecanoate        | 25068     | -6.4074 | -5.8 | -6.1037  | 0.42949666 |
| $\beta$ -Sesquiphellandrene  | 519764    | -5.6727 | -6.5 | -6.08635 | 0.58498944 |
| $\beta$ -Vetivenene          | 14475467  | -4.972  | -7.2 | -6.086   | 1.57543391 |
| Methyl palmitate             | 8181      | -6.5632 | -5.6 | -6.0816  | 0.68108525 |
| Hydrocotarnine               | 3646      | -5.5587 | -6.6 | -6.07935 | 0.73631029 |
| Palmitic acid                | 985       | -6.5314 | -5.6 | -6.0657  | 0.65859926 |
| $\beta$ -Ionone              | 638014    | -5.23   | -6.9 | -6.065   | 1.18086832 |
| 1,2-Benzenedicarboxylic acid | 90531     | -5.8178 | -6.3 | -6.0589  | 0.34096689 |
| Rutin                        | 5280805   | -7.6162 | -4.5 | -6.0581  | 2.20348615 |
| Adenosine                    | 60961     | -5.497  | -6.6 | -6.0485  | 0.77993878 |
| 4-methyl-7-ethoxycoumarin    | 66595     | -5.1684 | -6.9 | -6.0342  | 1.2244261  |
| Kavain                       | 5281565   | -5.1301 | -6.9 | -6.01505 | 1.25150829 |
| Arbutine                     | 440936    | -5.3238 | -6.7 | -6.0119  | 0.97312035 |
| Caryophyllene oxide          | 1742210   | -4.8048 | -7.2 | -6.0024  | 1.69366216 |
| 3-Oxo-a-ionol                | 5370052   | -5.2944 | -6.7 | -5.9972  | 0.99390929 |
| $\beta$ -Selinene            | 442393    | -4.7669 | -7.2 | -5.98345 | 1.72046151 |
| $\alpha$ -Ionone             | 5282108   | -5.3431 | -6.6 | -5.97155 | 0.88876251 |
| $\alpha$ -Selinene           | 10856614  | -4.7041 | -7.2 | -5.95205 | 1.76486782 |
| Carvacryl acetate            | 80792     | -5.2979 | -6.5 | -5.89895 | 0.85001306 |
| Heptadecanoic acid           | 10465     | -6.5887 | -5.2 | -5.89435 | 0.98195919 |
| Carvylacetate                | 7335      | -5.2853 | -6.5 | -5.89265 | 0.85892261 |
| Harmol                       | 68094     | -4.7853 | -7   | -5.89265 | 1.56602939 |

|                                                                |          |         |      |          |            |
|----------------------------------------------------------------|----------|---------|------|----------|------------|
| Geranyl acetone                                                | 1549778  | -5.7688 | -6   | -5.8844  | 0.16348309 |
| (E)-Geranyl acetone                                            | 1713001  | -5.7645 | -6   | -5.88225 | 0.16652365 |
| 3-Hydroxy-damascone                                            | 5366075  | -5.2355 | -6.5 | -5.86775 | 0.89413652 |
| 4-methylmethoxycoumarin                                        | 223821   | -4.9655 | -6.7 | -5.83275 | 1.22647671 |
| Palmitoleic acid                                               | 445638   | -5.9622 | -5.7 | -5.8311  | 0.1854034  |
| Myristoleic acid                                               | 5281119  | -6.0621 | -5.6 | -5.83105 | 0.32675404 |
| 2(3H)-Naphthalenone, 4, 4a,5,6,7,8- hexahydro-1-methoxy        | 534313   | -5.0231 | -6.6 | -5.81155 | 1.11503668 |
| Myristic acid                                                  | 11005    | -6.1039 | -5.5 | -5.80195 | 0.42702179 |
| Shikimic acid                                                  | 8742     | -4.297  | -7.3 | -5.7985  | 2.12344166 |
| 3,4-Dimethyl-5-pentylidene-2(5H)-furanone                      | 6433214  | -5.4309 | -6.1 | -5.76545 | 0.47312515 |
| Phosphatidylcholine                                            | 10425706 | -6.165  | -5.3 | -5.7325  | 0.61164737 |
| $\alpha$ - Terpinyl acetate                                    | 111037   | -5.3424 | -6.1 | -5.7212  | 0.5357041  |
| Silane, triethyl(2-phenylethoxy)                               | 610043   | -6.1883 | -5.2 | -5.69415 | 0.69883363 |
| Lotaustralin                                                   | 441467   | -5.6701 | -5.7 | -5.68505 | 0.02114249 |
| 1-Dodecanamine, N, N-dimethyl                                  | 8168     | -6.2021 | -5.1 | -5.65105 | 0.77930238 |
| $\alpha$ -Longipinene                                          | 520957   | -4.1861 | -7.1 | -5.64305 | 2.06043845 |
| Eugenol                                                        | 3314     | -5.2433 | -6   | -5.62165 | 0.5350677  |
| DL-methyl-m-tyrosine                                           | 2110     | -4.9145 | -6.3 | -5.60725 | 0.97969645 |
| Cinnamyl acetate                                               | 5282110  | -5.0907 | -6.1 | -5.59535 | 0.71368287 |
| Methyl eugenol                                                 | 7127     | -5.3646 | -5.8 | -5.5823  | 0.30787429 |
| Diphenyl                                                       | 7095     | -4.6319 | -6.5 | -5.56595 | 1.32094618 |
| 4-(3-Hydroxy-1-butyln-1-yl)- 3,5,5-trimethyl-2-cyclohexen-1-ol | 5280654  | -4.8283 | -6.3 | -5.56415 | 1.04064905 |
| Sinapyl alcohol                                                | 5280507  | -5.4115 | -5.7 | -5.55575 | 0.20400031 |
| 4-aminoantipyrine                                              | 2151     | -4.7989 | -6.3 | -5.54945 | 1.06143799 |
| $\beta$ -Homocyclocitral                                       | 61124    | -4.7859 | -6.3 | -5.54295 | 1.07063038 |
| Ferulic acid                                                   | 445858   | -4.8534 | -6.2 | -5.5267  | 0.95218999 |
| Methylcoumarin                                                 | 17130    | -4.4263 | -6.6 | -5.51315 | 1.53703801 |
| 3,4-Dimethyl-5-pentylfuran-2(5H)-one                           | 13192443 | -5.2729 | -5.7 | -5.48645 | 0.30200531 |
| Sinapic acid                                                   | 637775   | -5.0139 | -5.9 | -5.45695 | 0.62656732 |
| Coniferol                                                      | 1549095  | -5.0135 | -5.9 | -5.45675 | 0.62685016 |
| Carvacrol                                                      | 10364    | -4.9454 | -5.9 | -5.4227  | 0.67500413 |
| Dodecendioic acid                                              | 5283028  | -5.6256 | -5.2 | -5.4128  | 0.30094465 |
| 1-Methyl naphthalene                                           | 7002     | -4.244  | -6.5 | -5.372   | 1.5952329  |
| Esculetin                                                      | 5281416  | -4.417  | -6.3 | -5.3585  | 1.33148207 |
| Carnosine                                                      | 439224   | -5.0159 | -5.7 | -5.35795 | 0.48373175 |

|                                               |          |         |      |          |            |
|-----------------------------------------------|----------|---------|------|----------|------------|
| Thymol                                        | 6989     | -4.8135 | -5.9 | -5.35675 | 0.76827152 |
| 1,2-O-isopropylidene-D-glucoside              | 87704    | -5.1923 | -5.5 | -5.34615 | 0.21757676 |
| Phenylalanine                                 | 6140     | -4.9566 | -5.7 | -5.3283  | 0.52566318 |
| Umbelliferone                                 | 5281426  | -4.3147 | -6.3 | -5.30735 | 1.40381909 |
| 4-Acetyl-2-methylphenol                       | 70135    | -4.7125 | -5.9 | -5.30625 | 0.8396893  |
| Carvone                                       | 7439     | -4.7003 | -5.9 | -5.30015 | 0.84831601 |
| Syringic acid                                 | 10742    | -4.9963 | -5.6 | -5.29815 | 0.42688036 |
| p-Cymene                                      | 7463     | -4.7899 | -5.8 | -5.29495 | 0.71424856 |
| $\beta$ -Cyclocitral                          | 9895     | -4.5274 | -6   | -5.2637  | 1.04128545 |
| Isopropyl- $\beta$ -D-thio-galacto-pyranoside | 656894   | -5.1108 | -5.4 | -5.2554  | 0.20449528 |
| Cumin aldehyde                                | 326      | -4.6846 | -5.8 | -5.2423  | 0.7887069  |
| (E)-Anethole                                  | 637563   | -4.6844 | -5.8 | -5.2422  | 0.78884833 |
| Vitamin B5                                    | 6613     | -5.1835 | -5.3 | -5.24175 | 0.08237794 |
| Lauric acid                                   | 3893     | -5.3441 | -5.1 | -5.22205 | 0.17260477 |
| Caffeic acid                                  | 689043   | -4.537  | -5.9 | -5.2185  | 0.96378654 |
| Methyl chavicol                               | 8815     | -4.8043 | -5.6 | -5.20215 | 0.56264487 |
| Homovanillyl alcohol                          | 16928    | -4.8664 | -5.5 | -5.1832  | 0.44802286 |
| 4-Vinyl guaiacol                              | 332      | -4.7662 | -5.6 | -5.1831  | 0.58958563 |
| 1-Hydroxy-1-(4-hydroxyphenyl)-2-propanone     | 10261435 | -4.7305 | -5.6 | -5.16525 | 0.61482935 |
| Cinnamide                                     | 5273472  | -4.4147 | -5.9 | -5.15735 | 1.0502657  |
| $\alpha$ - Terpineol                          | 17100    | -4.7087 | -5.6 | -5.15435 | 0.63024427 |
| Cinnamic acid                                 | 444539   | -4.4    | -5.9 | -5.15    | 1.06066017 |
| p-coumaric acid                               | 637542   | -4.5185 | -5.7 | -5.10925 | 0.83544666 |
| Bornyl acetate                                | 6448     | -4.464  | -5.7 | -5.082   | 0.87398398 |
| Linalool                                      | 6549     | -4.8625 | -5.3 | -5.08125 | 0.30935922 |
| Oxime- methoxy-phenyl                         | 9602988  | -4.609  | -5.5 | -5.0545  | 0.63003214 |
| Naphthalene                                   | 931      | -4.0044 | -6.1 | -5.0522  | 1.48181297 |
| Indole-3-carboxaldehyde                       | 10256    | -4.1429 | -5.9 | -5.02145 | 1.24245733 |
| Salicylic alcohol                             | 5146     | -4.1962 | -5.8 | -4.9981  | 1.13405786 |
| Vanillic acid                                 | 8468     | -4.5874 | -5.4 | -4.9937  | 0.57459497 |
| Decanal                                       | 8175     | -4.9718 | -4.9 | -4.9359  | 0.05077027 |
| Hydroxycinnamaldehyde                         | 71407359 | -4.2696 | -5.6 | -4.9348  | 0.94073486 |
| Synephrine                                    | 7172     | -4.5609 | -5.3 | -4.93045 | 0.52262262 |
| 2-Pentylfuran                                 | 19602    | -4.9606 | -4.9 | -4.9303  | 0.04285067 |
| Phthalic acid                                 | 1017     | -4.1366 | -5.7 | -4.9183  | 1.10549074 |
| Decan-2-one                                   | 12741    | -5.1194 | -4.7 | -4.9097  | 0.29656058 |
| n-acetyl-L-glutamine                          | 182230   | -4.7064 | -5.1 | -4.9032  | 0.27831723 |
| 2, 6,-Nonadienal, 3, 7-dimethyl               | 5364526  | -5.2967 | -4.4 | -4.84835 | 0.63406265 |

|                                                        |          |         |      |          |            |
|--------------------------------------------------------|----------|---------|------|----------|------------|
| 2,4,6-Trimethyl-5H-1,3,5-dithiazine                    | 12518    | -3.8607 | -5.8 | -4.83035 | 1.37129218 |
| 2-(1-Pentenyl)furan                                    | 5369956  | -4.6584 | -5   | -4.8292  | 0.24154768 |
| Scopoletin                                             | 5280460  | -4.8319 | -4.8 | -4.81595 | 0.02255671 |
| p-Hydroxy-acetophenone                                 | 7469     | -4.3131 | -5.3 | -4.80655 | 0.69784368 |
| m-Hydroxy-acetophenone                                 | 8487     | -4.307  | -5.3 | -4.8035  | 0.70215703 |
| 2,6-Dimethoxy-hydroquinone                             | 96038    | -4.594  | -5   | -4.797   | 0.28708535 |
| Anthranilic acid methyl ester                          | 8635     | -4.438  | -5.1 | -4.769   | 0.46810469 |
| 4-deoxypyridoxine                                      | 6094     | -4.5186 | -4.9 | -4.7093  | 0.26969053 |
| Gallic acid                                            | 370      | -4.1138 | -5.3 | -4.7069  | 0.83877006 |
| Acetophenone                                           | 7410     | -4.207  | -5.2 | -4.7035  | 0.70215703 |
| Tyrosol                                                | 10393    | -4.4069 | -5   | -4.70345 | 0.41938503 |
| Gentisic acid                                          | 3469     | -3.985  | -5.4 | -4.6925  | 1.0005561  |
| 1,6-dioxaspiro[4.4]non-3-ene                           | 10374471 | -4.4645 | -4.9 | -4.68225 | 0.307945   |
| Benzofuran, 2,3,-dihydro                               | 10329    | -4.2513 | -5.1 | -4.67565 | 0.60012153 |
| 3,4-Dihydroxybenzoic acid                              | 72       | -4.0344 | -5.3 | -4.6672  | 0.89491434 |
| Nonanol                                                | 8914     | -4.826  | -4.5 | -4.663   | 0.23051681 |
| Anisaldehyde                                           | 31244    | -4.2319 | -5   | -4.61595 | 0.54312872 |
| Dimethyl-L-tartrate                                    | 11851    | -4.4985 | -4.7 | -4.59925 | 0.14248202 |
| Glucosamine                                            | 439213   | -4.3604 | -4.8 | -4.5802  | 0.31084414 |
| 3-Octanone                                             | 246728   | -4.6443 | -4.5 | -4.57215 | 0.10203551 |
| Indole                                                 | 798      | -4.024  | -5.1 | -4.562   | 0.7608469  |
| DL-a aminopimelic acid                                 | 101122   | -4.4709 | -4.6 | -4.53545 | 0.09128749 |
| n-Octanal                                              | 454      | -4.6303 | -4.4 | -4.51515 | 0.16284669 |
| Citric acid                                            | 311      | -4.1841 | -4.8 | -4.49205 | 0.43550707 |
| 2-Heptanone                                            | 8051     | -4.7635 | -4.2 | -4.48175 | 0.39845467 |
| L-2-aminoadipic acid                                   | 92136    | -4.463  | -4.5 | -4.4815  | 0.02616295 |
| p-hydroxybenzoic acid                                  | 135      | -3.9569 | -5   | -4.47845 | 0.73758308 |
| Camphor                                                | 2537     | -3.7481 | -5.2 | -4.47405 | 1.02664834 |
| Mannitol                                               | 6251     | -4.5451 | -4.4 | -4.47255 | 0.10260119 |
| Borneol                                                | 64685    | -3.9352 | -5   | -4.4676  | 0.7529273  |
| 5,6-Dihydro-4-pentyl- 2,6-dimethyl-4H-1,3,5-dithiazine | 528360   | -4.4324 | -4.5 | -4.4662  | 0.04780042 |
| Resorcinol                                             | 5054     | -3.6963 | -5.2 | -4.44815 | 1.06327647 |
| p-Hydroxybenzyl alcohol                                | 125      | -4.167  | -4.7 | -4.4335  | 0.37688791 |
| Nonanal                                                | 31289    | -4.5463 | -4.3 | -4.42315 | 0.1741604  |
| Levoglucozan                                           | 2724705  | -4.0292 | -4.8 | -4.4146  | 0.54503791 |
| 3-hydroxy-2,3 dihydromaltol                            | 119838   | -4.0065 | -4.8 | -4.40325 | 0.56108923 |
| Heptanal                                               | 8130     | -4.5712 | -4.2 | -4.3856  | 0.26247804 |

|                                |         |         |      |          |            |
|--------------------------------|---------|---------|------|----------|------------|
| Galactal                       | 2734735 | -4.1197 | -4.6 | -4.35985 | 0.33962339 |
| p-Hydroxy-benzaldehyde         | 126     | -3.9481 | -4.7 | -4.32405 | 0.53167359 |
| Pyrogallol                     | 1057    | -3.7576 | -4.8 | -4.2788  | 0.73708811 |
| Niacinamide                    | 936     | -3.8435 | -4.7 | -4.27175 | 0.60563696 |
| Leucine                        | 6106    | -4.0361 | -4.5 | -4.26805 | 0.32802684 |
| Rhamnose                       | 25310   | -3.9858 | -4.5 | -4.2429  | 0.36359431 |
| adenine                        | 190     | -3.7562 | -4.7 | -4.2281  | 0.66736738 |
| Benzaldehyde                   | 240     | -3.7272 | -4.6 | -4.1636  | 0.6171628  |
| Arabitol                       | 94154   | -4.1734 | -4.1 | -4.1367  | 0.05190164 |
| Levulinic acid                 | 11579   | -4.0863 | -4.1 | -4.09315 | 0.00968736 |
| Glutaric acid                  | 743     | -4.0702 | -4.1 | -4.0851  | 0.02107178 |
| Proline                        | 145742  | -3.966  | -4.2 | -4.083   | 0.16546299 |
| Hexanal                        | 6184    | -4.3069 | -3.8 | -4.05345 | 0.35843243 |
| Creatinine                     | 588     | -3.8957 | -4.2 | -4.04785 | 0.21517259 |
| Histidinol                     | 776     | -3.8791 | -4.2 | -4.03955 | 0.22691057 |
| 1,4-benzoquinone               | 4650    | -3.4607 | -4.6 | -4.03035 | 0.80560676 |
| 2-acetylpyrrole                | 14079   | -3.9207 | -4.1 | -4.01035 | 0.12678425 |
| 6-azacytosine                  | 70265   | -3.8149 | -4.2 | -4.00745 | 0.27230682 |
| 2-deoxy-D-ribose               | 5460005 | -3.9422 | -4   | -3.9711  | 0.04087077 |
| Succinic acid                  | 1110    | -3.6622 | -4   | -3.8311  | 0.23886067 |
| L-threonine                    | 6288    | -3.7189 | -3.8 | -3.75945 | 0.05734636 |
| Aminobutyric acid              | 119     | -3.7508 | -3.6 | -3.6754  | 0.1066317  |
| 3,5-Dimethyl-1,2,4-trithiolane | 32033   | -4.0116 | -3.3 | -3.6558  | 0.50317719 |
| 1, 2, 3-Butanetriol            | 20497   | -3.7666 | -3.4 | -3.5833  | 0.25922535 |
| Choline                        | 305     | -3.8847 | -3.1 | -3.49235 | 0.55486669 |
| Formic acid                    | 284     | -2.7725 | -2.7 | -2.73625 | 0.05126524 |

**Table S3.** UD Phytochemicals docking values against CLR1. Values in kcal/mol.

| Phytochemical                    | PubChem CID | Moe Result | AutoVina Result | Mean value | Deviation  |
|----------------------------------|-------------|------------|-----------------|------------|------------|
| Zafirlukast                      | 5717        | -9.2853    | -13.3           | -11.29265  | 2.83882159 |
| Amentoflavone                    | 5281600     | -7.7306    | -11.4           | -9.5653    | 2.59465762 |
| Lutein                           | 5281243     | -8.8226    | -9.5            | -9.1613    | 0.47899413 |
| Alpha-tocotrienol                | 5282347     | -8.8163    | -9.4            | -9.10815   | 0.41273823 |
| Violaxanthin                     | 448438      | -8.3911    | -9.5            | -8.94555   | 0.78411071 |
| Epicatechin gallate              | 107905      | -7.6778    | -10.2           | -8.9389    | 1.78346472 |
| Epigallocatechin gallate         | 65064       | -7.8464    | -10             | -8.9232    | 1.52282516 |
| $\beta$ -carotene                | 5280489     | -8.2492    | -9.5            | -8.8746    | 0.88444916 |
| Neoxanthin                       | 5282217     | -7.845     | -9.9            | -8.8725    | 1.45310444 |
| Sitosterol- $\beta$ -D-glucoside | 91884650    | -7.9921    | -9.5            | -8.74605   | 1.06624632 |

|                                 |           |         |       |          |            |
|---------------------------------|-----------|---------|-------|----------|------------|
| Peonidin 3-O-rutinoside         | 44256842  | -7.6581 | -9.3  | -8.47905 | 1.16099862 |
| Kaempferol-3-rutinoside         | 5318767   | -7.5365 | -9.3  | -8.41825 | 1.24698281 |
| Isorhamnetin 3-O-rutinoside     | 5481663   | -7.847  | -8.9  | -8.3735  | 0.74458344 |
| 9-amino-camptothecin            | 72402     | -6.5824 | -10   | -8.2912  | 2.41660814 |
| Quercetin rhamnoside            | 15939939  | -7.3642 | -9.2  | -8.2821  | 1.29810663 |
| Apigenin-7-O-glucoside          | 44257792  | -7.3268 | -9.2  | -8.2634  | 1.32455242 |
| Dicaffeoylquinic acid           | 12358846  | -6.8071 | -9.7  | -8.25355 | 2.04558921 |
| Cholecalciferol                 | 5280795   | -6.8615 | -9.5  | -8.18075 | 1.86570124 |
| Hecogenin                       | 91453     | -5.8181 | -10.3 | -8.05905 | 3.16918188 |
| Isorhamnetin-3-O-glucoside      | 5318645   | -6.9907 | -9.1  | -8.04535 | 1.49150033 |
| 7 $\alpha$ -Hydroxy sitosterol  | 161816    | -6.8783 | -9    | -7.93915 | 1.50026846 |
| Quercitrin                      | 5280459   | -6.5394 | -9.3  | -7.9197  | 1.95203898 |
| Isorhamnetin rutinoside         | 133562525 | -7.8337 | -8    | -7.91685 | 0.11759186 |
| 7 $\beta$ -Hydroxy-sitosterol   | 12309569  | -6.5349 | -9.2  | -7.86745 | 1.88451028 |
| Phytosterols                    | 12303662  | -6.7343 | -9    | -7.86715 | 1.60209183 |
| (+)-Neo-olivil                  | 9976812   | -7.1292 | -8.5  | -7.8146  | 0.96930198 |
| Deoxyharringtonine              | 285342    | -7.3819 | -8.1  | -7.74095 | 0.50777338 |
| Caffeoyl feruloyl tartaric acid | 129724266 | -7.7648 | -7.7  | -7.7324  | 0.04582052 |
| Quercetin dihexoside            | 5320835   | -7.3235 | -8.1  | -7.71175 | 0.54906842 |
| Quercetin-3-O-glucoside         | 25203368  | -6.7144 | -8.7  | -7.7072  | 1.40403122 |
| Solanidine                      | 65727     | -5.2102 | -10.2 | -7.7051  | 3.52832142 |
| Carnosol                        | 442009    | -6.0237 | -9.3  | -7.66185 | 2.31669395 |
| Kaempferol rhamnoside           | 5835713   | -6.4036 | -8.9  | -7.6518  | 1.76522137 |
| Bioallethrin                    | 15558638  | -6.8256 | -8.4  | -7.6128  | 1.11326892 |
| $\gamma$ -sitosterol            | 457801    | -5.9077 | -9.3  | -7.60385 | 2.39871833 |
| Pukateine                       | 442340    | -5.9049 | -9.3  | -7.60245 | 2.40069823 |
| Kaempferol-3-O-glucoside        | 5282102   | -6.4301 | -8.6  | -7.51505 | 1.534351   |
| Beta-Sitosterol                 | 222284    | -5.9227 | -9.1  | -7.51135 | 2.24669038 |
| 3,4-dimethoxychalcone           | 5354494   | -6.3834 | -8.6  | -7.4917  | 1.56737289 |
| 6-aminochrysene                 | 17534     | -5.7364 | -9.2  | -7.4682  | 2.44913505 |
| Chlorogenic acid                | 1794427   | -6.307  | -8.6  | -7.4535  | 1.62139585 |
| Isolariciresinol                | 160521    | -7.2816 | -7.6  | -7.4408  | 0.2251428  |
| Catechin hydrate                | 107957    | -6.2596 | -8.6  | -7.4298  | 1.65491271 |
| Quercetin-3-glucoside           | 5280804   | -6.3331 | -8.5  | -7.41655 | 1.53222968 |
| Epicatechin                     | 72276     | -6.1085 | -8.6  | -7.35425 | 1.76175655 |
| 10-gingerdione                  | 5317591   | -7.2815 | -7.4  | -7.34075 | 0.08379215 |
| Convolvamine                    | 420422    | -6.5791 | -8.1  | -7.33955 | 1.0754387  |
| Estra-1,3,5(10)-trien-17B-ol    | 9811784   | -6.1295 | -8.5  | -7.31475 | 1.67619662 |
| Incensole oxide acetate         | 73755086  | -6.2194 | -8.4  | -7.3097  | 1.54191705 |
| Piperine                        | 638024    | -6.1118 | -8.5  | -7.3059  | 1.68871241 |



|                                                        |           |         |      |          |            |
|--------------------------------------------------------|-----------|---------|------|----------|------------|
| Kaempferol pentoside                                   | 14749097  | -6.3891 | -8.2 | -7.29455 | 1.28049967 |
| Ursolic acid                                           | 64945     | -5.9873 | -8.6 | -7.29365 | 1.84745789 |
| O-Feruloyl quinic acid                                 | 10177048  | -6.2794 | -8.3 | -7.2897  | 1.42877996 |
| Isorhamnetin                                           | 5281654   | -6.35   | -8.2 | -7.275   | 1.30814755 |
| Crysoeriol                                             | 5280666   | -6.311  | -8.2 | -7.2555  | 1.33572471 |
| Catechin                                               | 9064      | -5.8818 | -8.6 | -7.2409  | 1.92205765 |
| 1,2-Diguaiacyl-1,3-propanediol                         | 6426042   | -6.7305 | -7.7 | -7.21525 | 0.68554002 |
| Quercetin                                              | 5280343   | -6.027  | -8.4 | -7.2135  | 1.67796439 |
| Neochlorogenic acid                                    | 5280633   | -6.4101 | -8   | -7.20505 | 1.12422907 |
| 4-O-Caffeoylquinic acid                                | 58427569  | -6.097  | -8.3 | -7.1985  | 1.55775624 |
| Integerrimine                                          | 5281733   | -5.8432 | -8.5 | -7.1716  | 1.8786413  |
| Luteolin                                               | 5280445   | -5.7869 | -8.5 | -7.14345 | 1.91845141 |
| Apoatropine                                            | 64695     | -5.7415 | -8.5 | -7.12075 | 1.95055406 |
| Incensole oxide                                        | 90470329  | -6.1318 | -8.1 | -7.1159  | 1.39172757 |
| 8-dehydrogingerdione                                   | 131752598 | -6.8292 | -7.4 | -7.1146  | 0.40361655 |
| Benzyl salicilate                                      | 8363      | -5.8887 | -8.3 | -7.09435 | 1.70504658 |
| Myricetin                                              | 5281672   | -6.0788 | -8.1 | -7.0894  | 1.42920423 |
| Caffeoylquinic acid                                    | 10155076  | -6.17   | -8   | -7.085   | 1.29400541 |
| Kaempferol                                             | 5280863   | -5.9664 | -8.1 | -7.0332  | 1.50868303 |
| Feruloyl malate                                        | 71694479  | -6.3272 | -7.7 | -7.0136  | 0.97071619 |
| Neophytadiene                                          | 10446     | -7.4045 | -6.6 | -7.00225 | 0.56886741 |
| Dihydrokavain                                          | 10220256  | -5.8987 | -8.1 | -6.99935 | 1.55655416 |
| Phytol                                                 | 5280435   | -7.0931 | -6.9 | -6.99655 | 0.13654232 |
| Genistein                                              | 5280961   | -5.7681 | -8.2 | -6.98405 | 1.71961298 |
| Caffeoylmalic acid                                     | 6124299   | -6.1395 | -7.8 | -6.96975 | 1.17415081 |
| Safranal                                               | 61041     | -4.5988 | -9.3 | -6.9494  | 3.3242504  |
| Farnesylacetone                                        | 1711945   | -6.891  | -7   | -6.9455  | 0.07707464 |
| Naringenin                                             | 932       | -5.8755 | -8   | -6.93775 | 1.50224836 |
| Osthole                                                | 10228     | -5.8732 | -8   | -6.9366  | 1.5038747  |
| Flavan                                                 | 94156     | -5.6699 | -8.2 | -6.93495 | 1.78905087 |
| Apigenin                                               | 5280443   | -5.6551 | -8.2 | -6.92755 | 1.79951605 |
| Flavone                                                | 10680     | -5.4522 | -8.4 | -6.9261  | 2.08440937 |
| Eleutheroside B                                        | 5316860   | -6.4517 | -7.4 | -6.92585 | 0.67054936 |
| [1,1-Bicyclopropyl-2-octanoic acid 2hexyl-methyl ester | 50930793  | -7.2434 | -6.6 | -6.9217  | 0.4549525  |
| 6-benzylaminopurine                                    | 62389     | -5.3864 | -8.4 | -6.8932  | 2.130937   |
| Arachidonic acid                                       | 444899    | -7.2534 | -6.5 | -6.8767  | 0.53273425 |
| Podocarpic acid                                        | 93017     | -5.3012 | -8.4 | -6.8506  | 2.19118249 |
| Anthocyanins                                           | 145858    | -5.3574 | -8.3 | -6.8287  | 2.08073241 |
| $\beta$ -Bisabolene                                    | 10104370  | -6.1857 | -7.4 | -6.79285 | 0.85863976 |
| $\alpha$ -Copaene                                      | 442355    | -5.5702 | -8   | -6.7851  | 1.71812806 |
| Isopilosine                                            | 72312     | -5.9309 | -7.6 | -6.76545 | 1.18023193 |

|                                      |           |          |      |           |            |
|--------------------------------------|-----------|----------|------|-----------|------------|
| Secoisolariciresinol                 | 65373     | -6.7207  | -6.8 | -6.76035  | 0.05607357 |
| Kavain                               | 5281565   | -5.4879  | -8   | -6.74395  | 1.77632295 |
| p-Coumaroylmalic acid                | 129720114 | -6.194   | -7.2 | -6.697    | 0.71134942 |
| $\delta$ -Cadinene                   | 441005    | -5.7857  | -7.6 | -6.69285  | 1.28290383 |
| Pterostilbene                        | 5281727   | -6.159   | -7.2 | -6.6795   | 0.73609816 |
| $\beta$ - Vetivenene                 | 14475467  | -5.3038  | -8   | -6.6519   | 1.9065013  |
| 9-Hydroxy-10,12-octadecadienoic acid | 1927      | -6.739   | -6.5 | -6.6195   | 0.16899852 |
| Homatropine                          | 5282593   | -5.6374  | -7.6 | -6.6187   | 1.38776777 |
| 4-shogaol                            | 9794897   | -6.414   | -6.8 | -6.607    | 0.27294322 |
| Dibutyl phthalate                    | 3026      | -6.3947  | -6.8 | -6.59735  | 0.28659038 |
| Quinic acid                          | 6508      | -4.1625  | -9   | -6.58125  | 3.42062905 |
| Caffeoyl tartaric acid               | 9857913   | -5.8601  | -7.3 | -6.58005  | 1.01816305 |
| Farnesol                             | 445070    | -6.4383  | -6.7 | -6.56915  | 0.18504984 |
| $\alpha$ -Curcumene                  | 92139     | -5.7118  | -7.4 | -6.5559   | 1.19373767 |
| Linolenic acid                       | 5280934   | -6.8907  | -6.2 | -6.54535  | 0.48839865 |
| Heptadecanoic acid                   | 10465     | -7.2784  | -5.8 | -6.5392   | 1.04538667 |
| $\beta$ -Selinene                    | 442393    | -4.9756  | -8.1 | -6.5378   | 2.20928443 |
| $\beta$ - Sesquiphellandrene         | 519764    | -5.8329  | -7.2 | -6.51645  | 0.96668568 |
| Methyl palmitate                     | 8181      | -7.312   | -5.7 | -6.506    | 1.13985613 |
| Hexahydrofarnesylacetone             | 10408     | -6.2949  | -6.7 | -6.49745  | 0.28644896 |
| $\alpha$ -Selinene                   | 10856614  | -5.2572  | -7.7 | -6.4786   | 1.72732045 |
| Calamenene                           | 6429077   | -5.2454  | -7.7 | -6.4727   | 1.73566431 |
| $\gamma$ -Cadinene                   | 92313     | -5.4364  | -7.5 | -6.4682   | 1.45918555 |
| cis-10-Heptadecenoic acid            | 5312435   | -7.1097  | -5.8 | -6.45485  | 0.92609775 |
| Rutin                                | 5280805   | -7.6876  | -5.2 | -6.4438   | 1.75899883 |
| Adenosine                            | 60961     | -6.0808  | -6.8 | -6.4404   | 0.5085512  |
| $\beta$ -Bourbonene                  | 62566     | -5.2343  | -7.6 | -6.41715  | 1.67280251 |
| Abscisic acid                        | 5375199   | -5.4986  | -7.3 | -6.3993   | 1.27378216 |
| 1,2-Benzenedicarboxylic acid         | 90531     | -5.7572  | -7   | -6.3786   | 0.87879231 |
| Shikimic acid                        | 8742      | -4.851   | -7.9 | -6.3755   | 2.15596858 |
| 4-methyl-7-ethoxycoumarin            | 66595     | -5.529   | -7.2 | -6.3645   | 1.18157543 |
| Isotachioside                        | 15098566  | -5.6689  | -7   | -6.33445  | 0.94122984 |
| Tachioside                           | 11962143  | -5.66723 | -7   | -6.333615 | 0.9424107  |
| 3-Oxo- $\alpha$ -ionol               | 5370052   | -5.654   | -7   | -6.327    | 0.95176573 |
| Caryophyllene oxide                  | 1742210   | -5.2089  | -7.4 | -6.30445  | 1.54934167 |
| Isopropyl dodecanoate                | 25068     | -6.5985  | -6   | -6.29925  | 0.42320341 |
| Harmine                              | 5280953   | -5.4662  | -7.1 | -6.2831   | 1.15527106 |
| Palmitic acid                        | 985       | -6.8227  | -5.7 | -6.26135  | 0.79386878 |
| (E)-Geranyl acetone                  | 1713001   | -5.9057  | -6.6 | -6.25285  | 0.49094424 |

|                                                                       |          |          |      |           |            |
|-----------------------------------------------------------------------|----------|----------|------|-----------|------------|
| 4-(4-Hydroxy-2,6,6-trimethyl-1-cyclohexen-1-yl)-3-buten-2-one         | 538953   | -5.3783  | -7.1 | -6.23915  | 1.21742575 |
| 4-(3-Hydroxy-1-buten-1-yl)-3,5,5-trimethyl-2-cyclohexen-1-ol          | 5280654  | -5.4326  | -7   | -6.2163   | 1.10831917 |
| $\alpha$ -Copaene-8-ol                                                | 25086830 | -5.2963  | -7.1 | -6.19815  | 1.2754085  |
| Silane, triethyl(2-phenylethoxy)                                      | 610043   | -6.2938  | -6.1 | -6.1969   | 0.13703729 |
| Palmitoleic acid                                                      | 445638   | -6.2623  | -6.1 | -6.18115  | 0.11476343 |
| Phosphatidylcholine                                                   | 10425706 | -6.4498  | -5.9 | -6.1749   | 0.38876731 |
| Arbutine                                                              | 440936   | -5.6321  | -6.7 | -6.16605  | 0.75511933 |
| 2H-Indeno[1,2-b]furan-2-one, 3,3a,4,5,6,7,8,8b-octahydro-8,8-dimethyl | 605626   | -4.6997  | -7.6 | -6.14985  | 2.0508218  |
| $\alpha$ -Humulene                                                    | 5281520  | -5.2839  | -7   | -6.14195  | 1.21346595 |
| Geranyl acetone                                                       | 1549778  | -5.6472  | -6.6 | -6.1236   | 0.67373134 |
| Carvacryl acetate                                                     | 80792    | -5.3345  | -6.9 | -6.11725  | 1.10697567 |
| $\beta$ -Ionone                                                       | 638014   | -4.9986  | -7.2 | -6.0993   | 1.55662487 |
| 4-aminoantipyrine                                                     | 2151     | -5.2789  | -6.9 | -6.08945  | 1.1462908  |
| $\beta$ -Caryophyllene                                                | 5281515  | -5.2715  | -6.9 | -6.08575  | 1.15152339 |
| Myristoleic acid                                                      | 5281119  | -6.3248  | -5.8 | -6.0624   | 0.37108964 |
| 3-Hydroxy-damascone                                                   | 5366075  | -5.1143  | -7   | -6.05715  | 1.33339126 |
| $\alpha$ -Ionone                                                      | 5282108  | -5.0821  | -7   | -6.04105  | 1.3561601  |
| $\alpha$ -Terpinyl acetate                                            | 111037   | -5.5464  | -6.5 | -6.0232   | 0.67429703 |
| 4-methylmethoxycoumarin                                               | 223821   | -5.0446  | -7   | -6.0223   | 1.3826766  |
| Hydrocotarnine                                                        | 3646     | -4.9893  | -7   | -5.99465  | 1.4217796  |
| Carvylacetate                                                         | 7335     | -5.2878  | -6.7 | -5.9939   | 0.9985762  |
| Myristic acid                                                         | 11005    | -6.0784  | -5.9 | -5.9892   | 0.12614785 |
| Harmol                                                                | 68094    | -4.3978  | -7.5 | -5.9489   | 2.19358666 |
| Umbelliferone                                                         | 5281426  | -4.69    | -7.2 | -5.945    | 1.77483802 |
| 1-Methyl naphthalene                                                  | 7002     | -4.8778  | -7   | -5.9389   | 1.50062201 |
| Cinnamyl acetate                                                      | 5282110  | -5.1648  | -6.7 | -5.9324   | 1.08555033 |
| 2, 6,-Nonadienal, 3, 7-dimethyl                                       | 5364526  | -5.54549 | -6.3 | -5.922745 | 0.53351914 |
| $\alpha$ -Longipinene                                                 | 520957   | -4.8301  | -7   | -5.91505  | 1.534351   |
| Ferulic acid                                                          | 445858   | -5.3636  | -6.4 | -5.8818   | 0.73284547 |
| 3,4-Dimethyl-5-pentylfuran-2(5H)-one                                  | 13192443 | -5.1969  | -6.5 | -5.84845  | 0.92143085 |
| Methylcoumarin                                                        | 17130    | -4.6881  | -7   | -5.84405  | 1.63476017 |
| Sinapic acid                                                          | 637775   | -5.3841  | -6.3 | -5.84205  | 0.6476391  |
| 3,4-Dimethyl-5-pentylidene-2(5H)-furanone                             | 6433214  | -5.4503  | -6.2 | -5.82515  | 0.53011795 |

|                                                         |          |         |      |          |            |
|---------------------------------------------------------|----------|---------|------|----------|------------|
| Dodecendioic acid                                       | 5283028  | -5.7963 | -5.8 | -5.79815 | 0.0026163  |
| Diphenyl                                                | 7095     | -4.7317 | -6.8 | -5.76585 | 1.46250896 |
| Sinapyl alcohol                                         | 5280507  | -5.6316 | -5.9 | -5.7658  | 0.18978746 |
| Coniferol                                               | 1549095  | -5.4224 | -6.1 | -5.7612  | 0.47913555 |
| Caffeic acid                                            | 689043   | -4.8748 | -6.6 | -5.7374  | 1.21990062 |
| DL-methyl-m-tyrosine                                    | 2110     | -4.9635 | -6.5 | -5.73175 | 1.08646957 |
| 1-Dodecanamine, N, N-dimethyl                           | 8168     | -6.012  | -5.4 | -5.706   | 0.43274935 |
| Esculetin                                               | 5281416  | -4.5055 | -6.8 | -5.65275 | 1.62245651 |
| Eugenol                                                 | 3314     | -4.7999 | -6.5 | -5.64995 | 1.20215224 |
| Naphthalene                                             | 931      | -4.5981 | -6.7 | -5.64905 | 1.48626774 |
| Isopropyl- $\beta$ -D-thio-galacto-pyranoside           | 656894   | -5.3978 | -5.9 | -5.6489  | 0.35510903 |
| Linalool                                                | 6549     | -5.4829 | -5.8 | -5.64145 | 0.22422356 |
| 2(3H)-Naphthalenone, 4, 4a,5,6,7,8- hexahydro-1-methoxy | 534313   | -4.6344 | -6.6 | -5.6172  | 1.38988909 |
| Carvone                                                 | 7439     | -4.9276 | -6.3 | -5.6138  | 0.97043335 |
| Lauric acid                                             | 3893     | -5.607  | -5.6 | -5.6035  | 0.00494975 |
| Syringic acid                                           | 10742    | -4.848  | -6.3 | -5.574   | 1.02671905 |
| Lotaustralin                                            | 441467   | -5.1148 | -6   | -5.5574  | 0.62593092 |
| 1,2-O-isopropylidene-D-glucoside                        | 87704    | -5.1619 | -5.9 | -5.53095 | 0.52191552 |
| 1-Hydroxy-1-(4-hydroxyphenyl)-2-propanone               | 10261435 | -4.8377 | -6.2 | -5.51885 | 0.96329157 |
| Bornyl acetate                                          | 6448     | -5.0294 | -6   | -5.5147  | 0.68631784 |
| Phenylalanine                                           | 6140     | -4.7217 | -6.3 | -5.51085 | 1.11602663 |
| Methyl eugenol                                          | 7127     | -5.1103 | -5.9 | -5.50515 | 0.55840223 |
| Salicylic alcohol                                       | 5146     | -4.5095 | -6.5 | -5.50475 | 1.40749605 |
| Carvacrol                                               | 10364    | -4.7086 | -6.3 | -5.5043  | 1.12528973 |
| Cinnamide                                               | 5273472  | -4.6028 | -6.4 | -5.5014  | 1.27081231 |
| 4-Acetyl-2-methylphenol                                 | 70135    | -4.5748 | -6.4 | -5.4874  | 1.2906113  |
| p-coumaric acid                                         | 637542   | -4.7428 | -6.2 | -5.4714  | 1.030396   |
| $\alpha$ - Terpineol                                    | 17100    | -4.6997 | -6.2 | -5.44985 | 1.0608723  |
| 4-Vinyl guaiacol                                        | 332      | -4.4953 | -6.4 | -5.44765 | 1.34682629 |
| Vitamin B5                                              | 6613     | -5.1096 | -5.7 | -5.4048  | 0.41747584 |
| Scopoletin                                              | 5280460  | -4.7967 | -6   | -5.39835 | 0.85086159 |
| $\beta$ -Homocyclocitral                                | 61124    | -4.6758 | -6.1 | -5.3879  | 1.00706148 |
| Oxime- methoxy-phenyl                                   | 9602988  | -4.6698 | -6.1 | -5.3849  | 1.01130412 |
| Cinnamic acid                                           | 444539   | -4.5333 | -6.2 | -5.36665 | 1.17853487 |
| Anthranilic acid methyl ester                           | 8635     | -4.4225 | -6.3 | -5.36125 | 1.32759298 |
| Indole-3-carboxaldehyde                                 | 10256    | -4.4857 | -6.2 | -5.34285 | 1.21219315 |

|                            |          |         |      |          |            |
|----------------------------|----------|---------|------|----------|------------|
| β-Cyclocitral              | 9895     | -4.5498 | -6.1 | -5.3249  | 1.09615693 |
| Hydroxycinnamaldehyde      | 71407359 | -4.4329 | -6.2 | -5.31645 | 1.24952839 |
| Decanal                    | 8175     | -5.4307 | -5.2 | -5.31535 | 0.16312953 |
| Synephrine                 | 7172     | -4.7279 | -5.9 | -5.31395 | 0.82879986 |
| Homovanillyl alcohol       | 16928    | -4.6054 | -6   | -5.3027  | 0.98613112 |
| p-Cymene                   | 7463     | -4.4679 | -6.1 | -5.28395 | 1.15406898 |
| Tyrosol                    | 10393    | -4.6473 | -5.9 | -5.27365 | 0.88579266 |
| Thymol                     | 6989     | -4.835  | -5.7 | -5.2675  | 0.61164737 |
| m-Hydroxy-acetophenone     | 8487     | -4.4182 | -6.1 | -5.2591  | 1.18921218 |
| p-Hydroxy-acetophenone     | 7469     | -4.3179 | -6.2 | -5.25895 | 1.33084567 |
| 2-(1-Pentenyl)furan        | 5369956  | -4.8157 | -5.7 | -5.25785 | 0.62529453 |
| Vanillic acid              | 8468     | -4.3035 | -6.2 | -5.25175 | 1.34102801 |
| n-acetyl-L-glutamine       | 182230   | -4.861  | -5.6 | -5.2305  | 0.52255191 |
| 2-Pentylfuran              | 19602    | -4.9487 | -5.5 | -5.22435 | 0.38982797 |
| Cumin aldehyde             | 326      | -4.4233 | -6   | -5.21165 | 1.11489526 |
| p-Hydroxybenzyl alcohol    | 125      | -4.7761 | -5.6 | -5.18805 | 0.58258528 |
| Carnosine                  | 439224   | -4.5383 | -5.8 | -5.16915 | 0.89215663 |
| (E)-Anethole               | 637563   | -4.7357 | -5.6 | -5.16785 | 0.61115239 |
| Gallic acid                | 370      | -4.3235 | -6   | -5.16175 | 1.18546452 |
| 3,4-Dihydroxybenzoic acid  | 72       | -4.32   | -6   | -5.16    | 1.18793939 |
| Benzofuran, 2,3,-dihydro   | 10329    | -4.4133 | -5.9 | -5.15665 | 1.05125565 |
| Citric acid                | 311      | -4.6096 | -5.7 | -5.1548  | 0.77102923 |
| Indole                     | 798      | -4.3773 | -5.9 | -5.13865 | 1.0767115  |
| Camphor                    | 2537     | -4.4695 | -5.8 | -5.13475 | 0.94080557 |
| Decan-2-one                | 12741    | -5.1492 | -5.1 | -5.1246  | 0.03478965 |
| Acetophenone               | 7410     | -4.3399 | -5.9 | -5.11995 | 1.10315729 |
| Gentisic acid              | 3469     | -4.0272 | -6.2 | -5.1136  | 1.53640161 |
| 4-deoxypyridoxine          | 6094     | -4.615  | -5.6 | -5.1075  | 0.69650018 |
| p-hydroxybenzoic acid      | 135      | -4.2109 | -6   | -5.10545 | 1.26508474 |
| DL-a aminopimelic acid     | 101122   | -4.9943 | -5.1 | -5.04715 | 0.07474119 |
| Methyl chavicol            | 8815     | -4.5862 | -5.5 | -5.0431  | 0.64615418 |
| p-Hydroxy-benzaldehyde     | 126      | -4.1577 | -5.9 | -5.02885 | 1.23199214 |
| Nonanol                    | 8914     | -5.1383 | -4.9 | -5.01915 | 0.16850355 |
| Rhamnose                   | 25310    | -4.6346 | -5.4 | -5.0173  | 0.54121953 |
| 3-Octanone                 | 246728   | -4.8074 | -5.1 | -4.9537  | 0.20689944 |
| Glucosamine                | 439213   | -4.4778 | -5.4 | -4.9389  | 0.65209387 |
| Phthalic acid              | 1017     | -3.9633 | -5.9 | -4.93165 | 1.3694537  |
| 2,6-Dimethoxy-hydroquinone | 96038    | -4.5657 | -5.2 | -4.88285 | 0.44851783 |
| Niacinamide                | 936      | -4.4572 | -5.3 | -4.8786  | 0.5959496  |
| Borneol                    | 64685    | -4.2107 | -5.5 | -4.85535 | 0.91167277 |
| Levoglucosan               | 2724705  | -4.3066 | -5.4 | -4.8533  | 0.77315055 |
| Nonanal                    | 31289    | -4.7976 | -4.9 | -4.8488  | 0.07240773 |

|                                                        |          |         |      |          |            |
|--------------------------------------------------------|----------|---------|------|----------|------------|
| Pyrogallol                                             | 1057     | -4.1663 | -5.5 | -4.83315 | 0.94306831 |
| Galactal                                               | 2734735  | -4.6378 | -5   | -4.8189  | 0.25611408 |
| Leucine                                                | 6106     | -4.5448 | -5   | -4.7724  | 0.32187501 |
| Resorcinol                                             | 5054     | -4.0235 | -5.5 | -4.76175 | 1.04404316 |
| 1,4-benzoquinone                                       | 4650     | -4.0189 | -5.5 | -4.75945 | 1.04729585 |
| adenine                                                | 190      | -3.6127 | -5.9 | -4.75635 | 1.61736534 |
| L-2-aminoadipic acid                                   | 92136    | -4.3873 | -5.1 | -4.74365 | 0.503955   |
| n-Octanal                                              | 454      | -4.7779 | -4.7 | -4.73895 | 0.05508362 |
| Dimethyl-L-tartrate                                    | 11851    | -4.5738 | -4.9 | -4.7369  | 0.23065823 |
| Anisaldehyde                                           | 31244    | -4.2553 | -5.2 | -4.72765 | 0.66800378 |
| 1,6-dioxaspiro[4.4]non-3-ene                           | 10374471 | -4.3445 | -5.1 | -4.72225 | 0.53421917 |
| Benzaldehyde                                           | 240      | -3.918  | -5.5 | -4.709   | 1.11864293 |
| 5,6-Dihydro-4-pentyl- 2,6-dimethyl-4H-1,3,5-dithiazine | 528360   | -4.4817 | -4.9 | -4.69085 | 0.29578277 |
| Mannitol                                               | 6251     | -4.4562 | -4.8 | -4.6281  | 0.24310331 |
| 3-hydroxy-2,3 dihydromaltol                            | 119838   | -3.9397 | -5.2 | -4.56985 | 0.89116668 |
| 2-acetylpyrrole                                        | 14079    | -4.2283 | -4.9 | -4.56415 | 0.47496362 |
| 2-Heptanone                                            | 8051     | -4.5125 | -4.6 | -4.55625 | 0.06187184 |
| Arabitol                                               | 94154    | -4.5899 | -4.4 | -4.49495 | 0.13427958 |
| Histidinol                                             | 776      | -4.152  | -4.8 | -4.476   | 0.45820519 |
| 6-azacytosine                                          | 70265    | -3.813  | -5.1 | -4.4565  | 0.91004643 |
| Heptanal                                               | 8130     | -4.4708 | -4.4 | -4.4354  | 0.05006316 |
| Proline                                                | 145742   | -3.7627 | -5.1 | -4.43135 | 0.9456139  |
| 2,4,6-Trimethyl-5H-1,3,5-dithiazine                    | 12518    | -4.0916 | -4.7 | -4.3958  | 0.43020377 |
| 2-deoxy-D-ribose                                       | 5460005  | -4.4577 | -4.3 | -4.37885 | 0.11151074 |
| Levulinic acid                                         | 11579    | -4.1453 | -4.6 | -4.37265 | 0.32152145 |
| Creatinine                                             | 588      | -3.842  | -4.9 | -4.371   | 0.74811897 |
| L-threonine                                            | 6288     | -3.9374 | -4.8 | -4.3687  | 0.60995031 |
| Glutaric acid                                          | 743      | -4.1397 | -4.5 | -4.31985 | 0.25477057 |
| 1, 2, 3-Butanetriol                                    | 20497    | -4.1191 | -4.4 | -4.25955 | 0.19862629 |
| Succinic acid                                          | 1110     | -3.9619 | -4.5 | -4.23095 | 0.38049416 |
| Hexanal                                                | 6184     | -4.0387 | -4.3 | -4.16935 | 0.184767   |
| Aminobutyric acid                                      | 119      | -3.9181 | -4.3 | -4.10905 | 0.27004408 |
| 3,5-Dimethyl-1,2,4-trithiolane                         | 32033    | -4.3859 | -3.7 | -4.04295 | 0.48500454 |
| Choline                                                | 305      | -4.0584 | -3.7 | -3.8792  | 0.25342707 |
| Formic acid                                            | 284      | -3.143  | -2.5 | -2.8215  | 0.45466966 |

**Table S4.** UD Phytochemicals docking values against CRTH2. Values in kcal/mol.

| Phytochemical                  | PubChem CID | Moe Result | AutoVina Result | Mean value | Deviation  |
|--------------------------------|-------------|------------|-----------------|------------|------------|
| Neoxanthin                     | 5282217     | -9.1584    | -9.9            | -9.5292    | 0.52439039 |
| Alpha-tocotrienol              | 5282347     | -8.8178    | -9.7            | -9.2589    | 0.6238096  |
| Fevipirant                     | 23582412    | -7.6147    | -10.8           | -9.20735   | 2.25234723 |
| Ursolic acid                   | 64945       | -5.6173    | -12.3           | -8.95865   | 4.72538249 |
| Integerrimine                  | 5281733     | -6.8197    | -11             | -8.90985   | 2.95591848 |
| Amentoflavone                  | 5281600     | -7.9604    | -9.8            | -8.8802    | 1.30079363 |
| $\beta$ -carotene              | 5280489     | -9.0361    | -8.7            | -8.86805   | 0.23765859 |
| 9-amino-camptothecin           | 72402       | -7.4075    | -10.3           | -8.85375   | 2.04530636 |
| Hecogenin                      | 91453       | -7.1059    | -10.6           | -8.85295   | 2.4707018  |
| Kaempferol rhamnoside          | 5835713     | -7.8557    | -9.7            | -8.77785   | 1.30411704 |
| Cholecalciferol                | 5280795     | -7.71      | -9.7            | -8.705     | 1.40714249 |
| Solanidine                     | 65727       | -5.7075    | -11.7           | -8.70375   | 4.23733739 |
| Isorhamnetin 3-O-rutinoside    | 5481663     | -8.4971    | -8.9            | -8.69855   | 0.28489332 |
| Isorhamnetin rutinoside        | 133562525   | -7.6415    | -9.6            | -8.62075   | 1.38486863 |
| Isorhamnetin-3-O-glucoside     | 5318645     | -8.4237    | -8.8            | -8.61185   | 0.26608428 |
| Epicatechin gallate            | 107905      | -7.6214    | -9.6            | -8.6107    | 1.39908148 |
| Beta-Sitosterol                | 222284      | -7.2732    | -9.9            | -8.5866    | 1.85742809 |
| Phytosterols                   | 12303662    | -7.273     | -9.9            | -8.5865    | 1.85756951 |
| Deoxyharringtonine             | 285342      | -7.3694    | -9.8            | -8.5847    | 1.71869374 |
| Pukateine                      | 442340      | -6.7473    | -10.4           | -8.57365   | 2.58284894 |
| Peonidin 3-O-rutinoside        | 44256842    | -7.6339    | -9.4            | -8.51695   | 1.24882129 |
| Dicaffeoylquinic acid          | 12358846    | -7.6238    | -9.4            | -8.5119    | 1.25596306 |
| Kaempferol-3-O-glucoside       | 5282102     | -7.7047    | -9.3            | -8.50235   | 1.12804745 |
| 7 $\beta$ -Hydroxy-sitosterol  | 12309569    | -7.665     | -9.3            | -8.4825    | 1.15611959 |
| Quercetin-3-glucoside          | 5280804     | -7.5061    | -9.4            | -8.45305   | 1.33918953 |
| Apigenin-7-O-glucoside         | 44257792    | -7.8923    | -9              | -8.44615   | 0.78326218 |
| 7 $\alpha$ -Hydroxy sitosterol | 161816      | -7.4905    | -9.4            | -8.44525   | 1.3502204  |
| (+)-Neo-olivil                 | 9976812     | -8.2725    | -8.5            | -8.38625   | 0.16086679 |
| Kaempferol pentoside           | 14749097    | -7.3373    | -9.4            | -8.36865   | 1.45854916 |
| $\gamma$ -sitosterol           | 457801      | -7.2121    | -9.5            | -8.35605   | 1.6177896  |
| Epigallocatechin gallate       | 65064       | -7.3109    | -9.4            | -8.35545   | 1.47721678 |
| Quercetin-3-O-glucoside        | 25203368    | -7.062     | -9.6            | -8.331     | 1.79463701 |
| Incensole oxide                | 90470329    | -7.3586    | -9.3            | -8.3293    | 1.3727771  |
| Bioallethrin                   | 15558638    | -7.5291    | -9.1            | -8.31455   | 1.11079404 |
| 10-gingerdione                 | 5317591     | -8.7559    | -7.8            | -8.27795   | 0.67592337 |
| Carnosol                       | 442009      | -6.5472    | -10             | -8.2736    | 2.44149829 |
| Quercetin dihexoside           | 5320835     | -7.4724    | -9              | -8.2362    | 1.08017632 |

|                                                        |           |         |      |          |            |
|--------------------------------------------------------|-----------|---------|------|----------|------------|
| Quercetin rhamnoside                                   | 15939939  | -7.3316 | -9.1 | -8.2158  | 1.25044763 |
| Sitosterol- $\beta$ -D-glucoside                       | 91884650  | -7.3295 | -9.1 | -8.21475 | 1.25193256 |
| Violaxanthin                                           | 448438    | -8.2965 | -8.1 | -8.19825 | 0.13894648 |
| Quercitrin                                             | 5280459   | -7.4079 | -8.9 | -8.15395 | 1.05507403 |
| Kaempferol-3-rutinoside                                | 5318767   | -7.4941 | -8.8 | -8.14705 | 0.92341075 |
| Chlorogenic acid                                       | 1794427   | -7.4258 | -8.8 | -8.1129  | 0.97170614 |
| Incensole oxide acetate                                | 73755086  | -6.9897 | -9.1 | -8.04485 | 1.49220744 |
| 8-dehydrogingerdione                                   | 131752598 | -7.6329 | -8.4 | -8.01645 | 0.54242161 |
| Caffeoyl feruloyl tartaric acid                        | 129724266 | -7.5822 | -8.4 | -7.9911  | 0.57827193 |
| Arachidonic acid                                       | 444899    | -8.4598 | -7.5 | -7.9799  | 0.67868109 |
| [1,1-Bicyclopropyl-2-octanoic acid 2hexyl-methyl ester | 50930793  | -8.2349 | -7.7 | -7.96745 | 0.37823142 |
| Eleutheroside B                                        | 5316860   | -8.0566 | -7.8 | -7.9283  | 0.1814436  |
| Isolariciresinol                                       | 160521    | -7.7516 | -8.1 | -7.9258  | 0.246356   |
| 4-O-Caffeoylquinic acid                                | 58427569  | -7.0148 | -8.8 | -7.9074  | 1.26232703 |
| Neochlorogenic acid                                    | 5280633   | -7.3305 | -8.4 | -7.86525 | 0.7562507  |
| Lutein                                                 | 5281243   | -8.8764 | -6.8 | -7.8382  | 1.46823652 |
| Phytol                                                 | 5280435   | -8.1492 | -7.4 | -7.7746  | 0.5297644  |
| O-Feruloyl quinic acid                                 | 10177048  | -6.9456 | -8.6 | -7.7728  | 1.16983746 |
| 6-aminochrysene                                        | 17534     | -5.689  | -9.8 | -7.7445  | 2.90691598 |
| Hexahydrofarnesylacetone                               | 10408     | -8.1707 | -7.3 | -7.73535 | 0.61567787 |
| Farnesylacetone                                        | 1711945   | -7.7022 | -7.7 | -7.7011  | 0.00155563 |
| Piperine                                               | 638024    | -6.5656 | -8.8 | -7.6828  | 1.57995939 |
| Linolenic acid                                         | 5280934   | -8.2408 | -7.1 | -7.6704  | 0.80666742 |
| Neophytadiene                                          | 10446     | -7.9142 | -7.4 | -7.6571  | 0.36359431 |
| Cryoeriol                                              | 5280666   | -6.3932 | -8.8 | -7.5966  | 1.7018646  |
| Naringenin                                             | 932       | -6.4152 | -8.7 | -7.5576  | 1.61559757 |
| Apigenin                                               | 5280443   | -6.4031 | -8.7 | -7.55155 | 1.62415357 |
| 1,2-Diguaiacyl-1,3-propanediol                         | 6426042   | -7.1314 | -7.9 | -7.5157  | 0.54348227 |
| Apoatropine                                            | 64695     | -6.5304 | -8.5 | -7.5152  | 1.39271752 |
| 9-Hydroxy-10,12-octadecadienoic acid                   | 1927      | -8.4101 | -6.6 | -7.50505 | 1.27993398 |
| Estra-1,3,5(10)-trien-17B-ol                           | 9811784   | -5.8899 | -9.1 | -7.49495 | 2.26988348 |
| Isorhamnetin                                           | 5281654   | -6.585  | -8.4 | -7.4925  | 1.28339881 |
| Caffeoylquinic acid                                    | 10155076  | -6.5783 | -8.4 | -7.48915 | 1.28813642 |
| Kaempferol                                             | 5280863   | -6.5767 | -8.4 | -7.48835 | 1.28926779 |
| Quercetin                                              | 5280343   | -6.5612 | -8.4 | -7.4806  | 1.30022795 |
| Secoisolariciresinol                                   | 65373     | -7.9543 | -7   | -7.47715 | 0.674792   |
| cis-10-Heptadecenoic acid                              | 5312435   | -7.9386 | -7   | -7.4693  | 0.66369042 |
| Podocarpic acid                                        | 93017     | -6.0727 | -8.8 | -7.43635 | 1.92849232 |



|                                                                       |          |         |      |          |            |
|-----------------------------------------------------------------------|----------|---------|------|----------|------------|
| Quinic acid                                                           | 6508     | -5.2299 | -9.6 | -7.41495 | 3.09012734 |
| Genistein                                                             | 5280961  | -6.0202 | -8.8 | -7.4101  | 1.96561543 |
| Isopilosine                                                           | 72312    | -6.7078 | -8.1 | -7.4039  | 0.98443406 |
| Anthocyanins                                                          | 145858   | -5.6801 | -9.1 | -7.39005 | 2.41823448 |
| Flavone                                                               | 10680    | -5.5661 | -9.2 | -7.38305 | 2.56955533 |
| Luteolin                                                              | 5280445  | -6.051  | -8.7 | -7.3755  | 1.87312586 |
| Osthole                                                               | 10228    | -6.2506 | -8.5 | -7.3753  | 1.59056599 |
| Catechin                                                              | 9064     | -6.4598 | -8.2 | -7.3299  | 1.23050722 |
| Myricetin                                                             | 5281672  | -6.344  | -8.3 | -7.322   | 1.38310086 |
| 3,4-dimethoxychalcone                                                 | 5354494  | -6.7336 | -7.9 | -7.3168  | 0.82476935 |
| Heptadecanoic acid                                                    | 10465    | -8.0307 | -6.6 | -7.31535 | 1.01165767 |
| $\alpha$ -Humulene                                                    | 5281520  | -5.9842 | -8.6 | -7.2921  | 1.84964992 |
| Pterostilbene                                                         | 5281727  | -6.7367 | -7.8 | -7.26835 | 0.75186664 |
| Flavan                                                                | 94156    | -5.6106 | -8.9 | -7.2553  | 2.32595705 |
| Homatropine                                                           | 5282593  | -6.2776 | -8.2 | -7.2388  | 1.35934208 |
| Dibutyl phthalate                                                     | 3026     | -6.7578 | -7.7 | -7.2289  | 0.66623601 |
| Convolvamine                                                          | 420422   | -6.7529 | -7.7 | -7.22645 | 0.66970083 |
| Catechin hydrate                                                      | 107957   | -6.2367 | -8.2 | -7.21835 | 1.38826274 |
| Abscisic acid                                                         | 5375199  | -6.5213 | -7.9 | -7.21065 | 0.97488812 |
| $\beta$ -Bisabolene                                                   | 10104370 | -6.3613 | -8   | -7.18065 | 1.15873588 |
| Tachioside                                                            | 11962143 | -6.9304 | -7.4 | -7.1652  | 0.33205734 |
| $\gamma$ -Cadinene                                                    | 92313    | -5.9392 | -8.3 | -7.1196  | 1.66933769 |
| Dihydrokavain                                                         | 10220256 | -6.3213 | -7.9 | -7.11065 | 1.11630948 |
| Calamenene                                                            | 6429077  | -6.0978 | -8.1 | -7.0989  | 1.4157692  |
| Feruloyl malate                                                       | 71694479 | -6.6857 | -7.5 | -7.09285 | 0.57579705 |
| $\delta$ -Cadinene                                                    | 441005   | -5.963  | -8.2 | -7.0815  | 1.58179787 |
| Benzyl salicilate                                                     | 8363     | -5.9259 | -8.2 | -7.06295 | 1.60803153 |
| $\alpha$ -Curcumene                                                   | 92139    | -6.1119 | -8   | -7.05595 | 1.33508831 |
| $\alpha$ -Selinene                                                    | 10856614 | -5.9081 | -8.2 | -7.05405 | 1.62061803 |
| $\beta$ -Caryophyllene                                                | 5281515  | -5.7323 | -8.3 | -7.01615 | 1.81563808 |
| Methyl palmitate                                                      | 8181     | -7.5954 | -6.4 | -6.9977  | 0.84527545 |
| 4-shogaol                                                             | 9794897  | -6.585  | -7.4 | -6.9925  | 0.57629203 |
| $\beta$ -Bourbonene                                                   | 62566    | -5.8698 | -8.1 | -6.9849  | 1.57698954 |
| $\beta$ - Vetivenene                                                  | 14475467 | -5.7566 | -8.2 | -6.9783  | 1.72774471 |
| Isotachioside                                                         | 15098566 | -6.3482 | -7.6 | -6.9741  | 0.88515627 |
| Palmitoleic acid                                                      | 445638   | -7.1472 | -6.8 | -6.9736  | 0.24550747 |
| 2H-Indeno[1,2-b]furan-2-one, 3,3a,4,5,6,7,8,8b-octahydro-8,8-dimethyl | 605626   | -5.4818 | -8.4 | -6.9409  | 2.06347901 |
| Palmitic acid                                                         | 985      | -7.3703 | -6.5 | -6.93515 | 0.61539503 |
| $\alpha$ -Copaene-8-ol                                                | 25086830 | -5.9479 | -7.9 | -6.92395 | 1.38034315 |
| Caryophyllene oxide                                                   | 1742210  | -5.5388 | -8.3 | -6.9194  | 1.95246324 |
| Rutin                                                                 | 5280805  | -7.9242 | -5.9 | -6.9121  | 1.43132555 |

|                                                                |           |         |      |          |            |
|----------------------------------------------------------------|-----------|---------|------|----------|------------|
| 3-Hydroxy-damascone                                            | 5366075   | -6.2048 | -7.6 | -6.9024  | 0.98655538 |
| $\beta$ -Selinene                                              | 442393    | -5.6783 | -8.1 | -6.88915 | 1.71240049 |
| p-Coumaroylmalic acid                                          | 129720114 | -6.3565 | -7.4 | -6.87825 | 0.73786593 |
| Caffeoylmalic acid                                             | 6124299   | -6.354  | -7.4 | -6.877   | 0.73963369 |
| Harmine                                                        | 5280953   | -5.7357 | -8   | -6.86785 | 1.60110188 |
| $\alpha$ -Copaene                                              | 442355    | -5.5044 | -8.2 | -6.8522  | 1.90607704 |
| Safranal                                                       | 61041     | -4.7847 | -8.9 | -6.84235 | 2.90995654 |
| Caffeoyl tartaric acid                                         | 9857913   | -6.3693 | -7.2 | -6.78465 | 0.5873936  |
| Farnesol                                                       | 445070    | -6.6151 | -6.9 | -6.75755 | 0.20145472 |
| $\beta$ - Sesquiphellandrene                                   | 519764    | -6.0007 | -7.5 | -6.75035 | 1.0601652  |
| Geranyl acetone                                                | 1549778   | -6.2355 | -7.2 | -6.71775 | 0.68200449 |
| $\beta$ -Ionone                                                | 638014    | -5.9657 | -7.4 | -6.68285 | 1.01420326 |
| Kavain                                                         | 5281565   | -5.8216 | -7.5 | -6.6608  | 1.18680802 |
| 6-benzylaminopurine                                            | 62389     | -5.5097 | -7.8 | -6.65485 | 1.61948666 |
| $\alpha$ -Longipinene                                          | 520957    | -5.3015 | -8   | -6.65075 | 1.90812765 |
| 4-(3-Hydroxy-1-butyln-1-yl)- 3,5,5-trimethyl-2-cyclohexen-1-ol | 5280654   | -6.1756 | -7.1 | -6.6378  | 0.65364951 |
| Isopropyl dodecanoate                                          | 25068     | -6.8426 | -6.4 | -6.6213  | 0.31296546 |
| Arbutine                                                       | 440936    | -6.0137 | -7.2 | -6.60685 | 0.83884077 |
| Adenosine                                                      | 60961     | -5.8107 | -7.4 | -6.60535 | 1.12380481 |
| Myristoleic acid                                               | 5281119   | -6.6092 | -6.6 | -6.6046  | 0.00650538 |
| 4-(4-Hydroxy-2,6,6-trimethyl1-cyclohexen-1-yl)-3-buten2-one    | 538953    | -5.9061 | -7.3 | -6.60305 | 0.98563614 |
| Myristic acid                                                  | 11005     | -6.8045 | -6.4 | -6.60225 | 0.28602469 |
| Carvacryl acetate                                              | 80792     | -5.8687 | -7.3 | -6.58435 | 1.01208194 |
| 4-methyl-7-ethoxycoumarin                                      | 66595     | -5.7922 | -7.3 | -6.5461  | 1.0661756  |
| 1,2-Benzenedicarboxylic acid                                   | 90531     | -6.0757 | -7   | -6.53785 | 0.6535788  |
| Dodecendioic acid                                              | 5283028   | -6.7256 | -6.3 | -6.5128  | 0.30094465 |
| Harmol                                                         | 68094     | -4.89   | -8.1 | -6.495   | 2.26981277 |
| Lotaustralin                                                   | 441467    | -6.1853 | -6.8 | -6.49265 | 0.43465854 |
| $\alpha$ -Ionone                                               | 5282108   | -5.8685 | -7.1 | -6.48425 | 0.870802   |
| Carvylacetate                                                  | 7335      | -5.9426 | -7   | -6.4713  | 0.74769471 |
| $\alpha$ - Terpinyl acetate                                    | 111037    | -5.841  | -7.1 | -6.4705  | 0.89024744 |
| 3-Oxo-a-ionol                                                  | 5370052   | -5.8127 | -7.1 | -6.45635 | 0.91025856 |
| Hydrocotarnine                                                 | 3646      | -5.6089 | -7.3 | -6.45445 | 1.19578828 |
| (E)-Geranyl acetone                                            | 1713001   | -5.9025 | -6.8 | -6.35125 | 0.63462834 |
| 4-aminoantipyrine                                              | 2151      | -5.5903 | -7.1 | -6.34515 | 1.06751911 |
| Phosphatidylcholine                                            | 10425706  | -6.8767 | -5.8 | -6.33835 | 0.76134187 |
| Shikimic acid                                                  | 8742      | -4.6246 | -8   | -6.3123  | 2.38676823 |

|                                                         |          |         |      |          |            |
|---------------------------------------------------------|----------|---------|------|----------|------------|
| 4-methylmethoxycoumarin                                 | 223821   | -5.2558 | -7.3 | -6.2779  | 1.44546768 |
| 1-Dodecanamine, N, N-dimethyl                           | 8168     | -6.5779 | -5.9 | -6.23895 | 0.47934769 |
| 3,4-Dimethyl-5-pentylidene-2(5H)-furanone               | 6433214  | -5.6012 | -6.8 | -6.2006  | 0.84767961 |
| Carnosine                                               | 439224   | -6.0939 | -6.3 | -6.19695 | 0.14573471 |
| 1,2-O-isopropylidene-D-glucoside                        | 87704    | -5.6552 | -6.7 | -6.1776  | 0.73878516 |
| Sinapyl alcohol                                         | 5280507  | -5.6522 | -6.6 | -6.1261  | 0.67019581 |
| 3,4-Dimethyl-5-pentylfuran-2(5H)-one                    | 13192443 | -5.6353 | -6.6 | -6.11765 | 0.68214591 |
| Ferulic acid                                            | 445858   | -5.3805 | -6.8 | -6.09025 | 1.00373808 |
| DL-methyl-m-tyrosine                                    | 2110     | -5.5675 | -6.6 | -6.08375 | 0.73008775 |
| Sinapic acid                                            | 637775   | -5.419  | -6.7 | -6.0595  | 0.90580379 |
| Lauric acid                                             | 3893     | -6.1082 | -6   | -6.0541  | 0.07650895 |
| Diphenyl                                                | 7095     | -4.8607 | -7.2 | -6.03035 | 1.65413489 |
| Cinnamyl acetate                                        | 5282110  | -5.6393 | -6.4 | -6.01965 | 0.53789613 |
| 2(3H)-Naphthalenone, 4, 4a,5,6,7,8- hexahydro-1-methoxy | 534313   | -5.128  | -6.9 | -6.014   | 1.25299322 |
| Methylcoumarin                                          | 17130    | -4.813  | -7.2 | -6.0065  | 1.68786389 |
| Bornyl acetate                                          | 6448     | -5.2107 | -6.8 | -6.00535 | 1.12380481 |
| Coniferol                                               | 1549095  | -5.5219 | -6.4 | -5.96095 | 0.62091046 |
| Silane, triethyl(2-phenylethoxy)                        | 610043   | -6.3736 | -5.5 | -5.9368  | 0.61772848 |
| Vitamin B5                                              | 6613     | -5.8601 | -6   | -5.93005 | 0.09892424 |
| Carvacrol                                               | 10364    | -5.3572 | -6.5 | -5.9286  | 0.80808163 |
| Isopropyl-β-D-thio-galacto-pyranoside                   | 656894   | -5.7351 | -6.1 | -5.91755 | 0.25802326 |
| Esculetin                                               | 5281416  | -4.7135 | -7.1 | -5.90675 | 1.68751033 |
| Carvone                                                 | 7439     | -5.2277 | -6.5 | -5.86385 | 0.89965196 |
| Caffeic acid                                            | 689043   | -5.0755 | -6.6 | -5.83775 | 1.07798429 |
| β-Homocyclocitral                                       | 61124    | -5.2664 | -6.4 | -5.8332  | 0.80157625 |
| Methyl eugenol                                          | 7127     | -5.4662 | -6.2 | -5.8331  | 0.51887496 |
| 1-Hydroxy-1-(4-hydroxyphenyl)-2-propanone               | 10261435 | -5.3115 | -6.3 | -5.80575 | 0.69897505 |
| p-coumaric acid                                         | 637542   | -5.0681 | -6.5 | -5.78405 | 1.0125062  |
| Cumin aldehyde                                          | 326      | -5.1216 | -6.4 | -5.7608  | 0.90396531 |
| Decanal                                                 | 8175     | -5.7036 | -5.8 | -5.7518  | 0.06816509 |
| Synephrine                                              | 7172     | -5.4506 | -6   | -5.7253  | 0.38848447 |
| α- Terpeneol                                            | 17100    | -5.1467 | -6.3 | -5.72335 | 0.81550625 |
| Linalool                                                | 6549     | -5.7636 | -5.6 | -5.6818  | 0.11568267 |

|                                     |          |         |      |          |            |
|-------------------------------------|----------|---------|------|----------|------------|
| Umbelliferone                       | 5281426  | -4.5236 | -6.8 | -5.6618  | 1.60965788 |
| Methyl chavicol                     | 8815     | -5.3025 | -6   | -5.65125 | 0.49320698 |
| Eugenol                             | 3314     | -5.3001 | -6   | -5.65005 | 0.49490404 |
| Decan-2-one                         | 12741    | -5.6493 | -5.6 | -5.62465 | 0.03486036 |
| 1-Methyl naphthalene                | 7002     | -4.4304 | -6.8 | -5.6152  | 1.67556023 |
| Cinnamic acid                       | 444539   | -4.7141 | -6.5 | -5.60705 | 1.262822   |
| p-Cymene                            | 7463     | -4.9746 | -6.2 | -5.5873  | 0.86648865 |
| Cinnamide                           | 5273472  | -4.845  | -6.3 | -5.5725  | 1.02884037 |
| $\beta$ -Cyclocitral                | 9895     | -4.8427 | -6.3 | -5.57135 | 1.03046671 |
| Hydroxycinnamaldehyde               | 71407359 | -4.8899 | -6.2 | -5.54495 | 0.92638059 |
| Phenylalanine                       | 6140     | -4.8746 | -6.2 | -5.5373  | 0.93719933 |
| Thymol                              | 6989     | -4.8693 | -6.2 | -5.53465 | 0.94094699 |
| Syringic acid                       | 10742    | -5.1464 | -5.8 | -5.4732  | 0.46216499 |
| Nonanal                             | 31289    | -5.5464 | -5.4 | -5.4732  | 0.10352043 |
| (E)-Anethole                        | 637563   | -4.8433 | -6.1 | -5.47165 | 0.88862109 |
| 2,4,6-Trimethyl-5H-1,3,5-dithiazine | 12518    | -4.6411 | -6.3 | -5.47055 | 1.17301944 |
| Camphor                             | 2537     | -4.626  | -6.3 | -5.463   | 1.18369675 |
| 2-(1-Pentenyl)furan                 | 5369956  | -5.1747 | -5.7 | -5.43735 | 0.37144319 |
| 4-Acetyl-2-methylphenol             | 70135    | -4.6724 | -6.2 | -5.4362  | 1.08017632 |
| n-acetyl-L-glutamine                | 182230   | -5.1643 | -5.7 | -5.43215 | 0.3787971  |
| Homovanillyl alcohol                | 16928    | -4.9815 | -5.8 | -5.39075 | 0.5787669  |
| DL-a aminopimelic acid              | 101122   | -5.1631 | -5.6 | -5.38155 | 0.30893495 |
| Nonanol                             | 8914     | -5.3269 | -5.4 | -5.36345 | 0.05168951 |
| m-Hydroxy-acetophenone              | 8487     | -4.6801 | -6   | -5.34005 | 0.93331024 |
| Borneol                             | 64685    | -4.6269 | -6   | -5.31345 | 0.97092832 |
| 2, 6,-Nonadienal, 3, 7-dimethyl     | 5364526  | -5.6615 | -4.9 | -5.28075 | 0.53846181 |
| Vanillic acid                       | 8468     | -4.7583 | -5.8 | -5.27915 | 0.73659313 |
| 2-Pentylfuran                       | 19602    | -5.0541 | -5.5 | -5.27705 | 0.31529891 |
| Indole-3-carboxaldehyde             | 10256    | -4.5462 | -6   | -5.2731  | 1.02799184 |
| Citric acid                         | 311      | -5.1082 | -5.4 | -5.2541  | 0.20633376 |
| Phthalic acid                       | 1017     | -4.5062 | -6   | -5.2531  | 1.05627611 |
| Oxime- methoxy-phenyl               | 9602988  | -4.606  | -5.9 | -5.253   | 0.91499617 |
| Salicylic alcohol                   | 5146     | -4.1527 | -6.3 | -5.22635 | 1.51837039 |
| 4-Vinyl guaiacol                    | 332      | -4.8502 | -5.6 | -5.2251  | 0.53018866 |
| Naphthalene                         | 931      | -4.247  | -6.2 | -5.2235  | 1.38097954 |
| Dimethyl-L-tartrate                 | 11851    | -5.3114 | -5.1 | -5.2057  | 0.14948237 |
| Scopoletin                          | 5280460  | -5.3105 | -5.1 | -5.20525 | 0.14884598 |
| Anthranilic acid methyl ester       | 8635     | -4.5022 | -5.9 | -5.2011  | 0.98839386 |
| Mannitol                            | 6251     | -5.4638 | -4.9 | -5.1819  | 0.3986668  |
| 2,6-Dimethoxy-hydroquinone          | 96038    | -4.8364 | -5.5 | -5.1682  | 0.46923606 |

|                                                        |          |         |      |          |            |
|--------------------------------------------------------|----------|---------|------|----------|------------|
| 3-Octanone                                             | 246728   | -5.2265 | -5.1 | -5.16325 | 0.08944901 |
| Levogluconan                                           | 2724705  | -4.8212 | -5.5 | -5.1606  | 0.47998408 |
| Gallic acid                                            | 370      | -4.4142 | -5.9 | -5.1571  | 1.05061926 |
| n-Octanal                                              | 454      | -5.206  | -5.1 | -5.153   | 0.07495332 |
| L-2-aminoadipic acid                                   | 92136    | -4.9894 | -5.3 | -5.1447  | 0.21962737 |
| p-Hydroxy-acetophenone                                 | 7469     | -4.4844 | -5.8 | -5.1422  | 0.93026968 |
| Anisaldehyde                                           | 31244    | -4.668  | -5.6 | -5.134   | 0.65902352 |
| 5,6-Dihydro-4-pentyl- 2,6-dimethyl-4H-1,3,5-dithiazine | 528360   | -4.8086 | -5.4 | -5.1043  | 0.41818295 |
| Gentisic acid                                          | 3469     | -4.4059 | -5.8 | -5.10295 | 0.98577756 |
| Tyrosol                                                | 10393    | -4.6817 | -5.5 | -5.09085 | 0.57862548 |
| Glucosamine                                            | 439213   | -5.0142 | -5.1 | -5.0571  | 0.06066976 |
| 3,4-Dihydroxybenzoic acid                              | 72       | -4.3518 | -5.7 | -5.0259  | 0.95332136 |
| Acetophenone                                           | 7410     | -4.4256 | -5.6 | -5.0128  | 0.8304262  |
| 4-deoxypyridoxine                                      | 6094     | -4.5791 | -5.4 | -4.98955 | 0.58046396 |
| Galactal                                               | 2734735  | -4.6969 | -5.2 | -4.94845 | 0.35574542 |
| p-hydroxybenzoic acid                                  | 135      | -4.2859 | -5.6 | -4.94295 | 0.92920902 |
| Benzofuran, 2,3,-dihydro                               | 10329    | -4.1153 | -5.7 | -4.90765 | 1.12055212 |
| Indole                                                 | 798      | -4.1834 | -5.6 | -4.8917  | 1.00168747 |
| 1,6-dioxaspiro[4.4]non-3-ene                           | 10374471 | -4.3218 | -5.4 | -4.8609  | 0.76240253 |
| Resorcinol                                             | 5054     | -3.7987 | -5.9 | -4.84935 | 1.48584348 |
| 2-Heptanone                                            | 8051     | -4.8427 | -4.8 | -4.82135 | 0.03019346 |
| Pyrogallol                                             | 1057     | -4.1368 | -5.5 | -4.8184  | 0.96392796 |
| Rhamnose                                               | 25310    | -4.7176 | -4.9 | -4.8088  | 0.12897628 |
| Heptanal                                               | 8130     | -4.709  | -4.9 | -4.8045  | 0.1350574  |
| Levulinic acid                                         | 11579    | -4.8489 | -4.7 | -4.77445 | 0.1052882  |
| Leucine                                                | 6106     | -4.5398 | -5   | -4.7699  | 0.32541054 |
| Histidinol                                             | 776      | -4.3507 | -5.1 | -4.72535 | 0.52983511 |
| 3-hydroxy-2,3 dihydromaltol                            | 119838   | -4.2345 | -5.2 | -4.71725 | 0.6827116  |
| Niacinamide                                            | 936      | -4.2304 | -5.2 | -4.7152  | 0.68561074 |
| Glutaric acid                                          | 743      | -4.7293 | -4.7 | -4.71465 | 0.02071823 |
| p-Hydroxy-benzaldehyde                                 | 126      | -3.9647 | -5.4 | -4.68235 | 1.01491036 |
| p-Hydroxybenzyl alcohol                                | 125      | -4.1477 | -5.1 | -4.62385 | 0.67337779 |
| Benzaldehyde                                           | 240      | -3.9888 | -5.2 | -4.5944  | 0.85644773 |
| 2-deoxy-D-ribose                                       | 5460005  | -4.6828 | -4.4 | -4.5414  | 0.1999698  |
| 2-acetylpyrrole                                        | 14079    | -4.1426 | -4.9 | -4.5213  | 0.53556268 |
| Proline                                                | 145742   | -4.1668 | -4.8 | -4.4834  | 0.44774001 |
| Succinic acid                                          | 1110     | -4.3544 | -4.6 | -4.4772  | 0.17366543 |
| Arabitol                                               | 94154    | -4.7375 | -4.2 | -4.46875 | 0.38006989 |
| Hexanal                                                | 6184     | -4.3103 | -4.6 | -4.45515 | 0.20484883 |
| adenine                                                | 190      | -3.6329 | -5.2 | -4.41645 | 1.10810704 |

|                                |       |         |      |          |            |
|--------------------------------|-------|---------|------|----------|------------|
| 1,4-benzoquinone               | 4650  | -3.7956 | -4.9 | -4.3478  | 0.78092873 |
| L-threonine                    | 6288  | -4.0912 | -4.3 | -4.1956  | 0.1476439  |
| Aminobutyric acid              | 119   | -4.361  | -4   | -4.1805  | 0.25526555 |
| 1, 2, 3-Butanetriol            | 20497 | -4.0756 | -4.2 | -4.1378  | 0.08796408 |
| 6-azacytosine                  | 70265 | -3.6023 | -4.6 | -4.10115 | 0.70548044 |
| 3,5-Dimethyl-1,2,4-trithiolane | 32033 | -4.4859 | -3.7 | -4.09295 | 0.55571522 |
| Creatinine                     | 588   | -3.7662 | -4.2 | -3.9831  | 0.30674292 |
| Choline                        | 305   | -4.2453 | -3.3 | -3.77265 | 0.66842804 |
| Epicatechin                    | 72276 | 1.6845  | -8.2 | -3.25775 | 6.98939698 |
| Formic acid                    | 284   | -3.1066 | -2.9 | -3.0033  | 0.14608826 |

**Table S5.** Phytochemicals docking values against BK2R. Values in kcal/mol.

| Phytochemical                  | PubChem CID | Moe Result | AutoVina Result | Mean value | Deviation  |
|--------------------------------|-------------|------------|-----------------|------------|------------|
| Isorhamnetin rutinoside        | 133562525   | -7.9376    | -9.5            | -8.7188    | 1.10478363 |
| Heptadecanoic acid             | 10465       | -6.3952    | -10.9           | -8.6476    | 3.18537463 |
| 7 $\beta$ -Hydroxy-sitosterol  | 12309569    | -7.49      | -9.8            | -8.645     | 1.63341666 |
| $\gamma$ -sitosterol           | 457801      | -7.5079    | -9.7            | -8.60395   | 1.55004878 |
| 7 $\alpha$ -Hydroxy sitosterol | 161816      | -7.0381    | -10.1           | -8.56905   | 2.16509025 |
| Amentoflavone                  | 5281600     | -7.7697    | -9              | -8.38485   | 0.86995347 |
| JSM-10292                      | 25019714    | -7.4507    | -9.3            | -8.37535   | 1.30765257 |
| Kaempferol-3-rutinoside        | 5318767     | -8.657     | -7.9            | -8.2785    | 0.53527983 |
| Bioallethrin                   | 15558638    | -6.4943    | -9.9            | -8.19715   | 2.40819356 |
| Isorhamnetin 3-O-rutinoside    | 5481663     | -8.8637    | -7.5            | -8.18185   | 0.96428152 |
| Quercetin rhamnoside           | 15939939    | -6.6669    | -9.1            | -7.88345   | 1.72046151 |
| Solanidine                     | 65727       | -6.2638    | -9.3            | -7.7819    | 2.14691761 |
| Piperine                       | 638024      | -5.646     | -9.9            | -7.773     | 3.00803225 |
| Quercetin dihexoside           | 5320835     | -7.94      | -7.6            | -7.77      | 0.24041631 |
| Isorhamnetin-3-O-glucoside     | 5318645     | -6.6619    | -8.7            | -7.68095   | 1.44115433 |
| Cholecalciferol                | 5280795     | -7.3929    | -7.8            | -7.59645   | 0.28786317 |
| Kaempferol-3-O-glucoside       | 5282102     | -6.924     | -8.2            | -7.562     | 0.90226825 |
| Epigallocatechin gallate       | 65064       | -6.6323    | -8.4            | -7.51615   | 1.24995266 |
| Beta-Sitosterol                | 222284      | -7.1653    | -7.6            | -7.38265   | 0.30737932 |
| Dihydrokavain                  | 10220256    | -5.8489    | -8.9            | -7.37445   | 2.1574535  |
| $\beta$ -carotene              | 5280489     | -6.9206    | -7.8            | -7.3603    | 0.6218297  |
| Dibutyl phthalate              | 3026        | -6.3725    | -8.3            | -7.33625   | 1.36294832 |
| 9-amino-camptothecin           | 72402       | -5.5655    | -9.1            | -7.33275   | 2.49926892 |
| Quercitrin                     | 5280459     | -6.6531    | -8              | -7.32655   | 0.95240212 |

|                                  |           |         |       |          |            |
|----------------------------------|-----------|---------|-------|----------|------------|
| Neophytadiene                    | 10446     | -7.1141 | -7.5  | -7.30705 | 0.27287251 |
| Quercetin-3-glucoside            | 5280804   | -6.387  | -8.2  | -7.2935  | 1.28198459 |
| Isolariciresinol                 | 160521    | -6.2642 | -8.3  | -7.2821  | 1.43952799 |
| Quercetin-3-O-glucoside          | 25203368  | -6.5624 | -8    | -7.2812  | 1.01653671 |
| Apoatropine                      | 64695     | -6.0488 | -8.5  | -7.2744  | 1.73326014 |
| Kaempferol rhamnoside            | 5835713   | -6.3532 | -8.1  | -7.2266  | 1.23517413 |
| Dicaffeoylquinic acid            | 12358846  | -7.7104 | -6.7  | -7.2052  | 0.71446069 |
| Neoxanthin                       | 5282217   | -8.3686 | -6    | -7.1843  | 1.67485312 |
| Isotachioside                    | 15098566  | -5.5622 | -8.8  | -7.1811  | 2.28947034 |
| Epicatechin gallate              | 107905    | -6.9613 | -7.4  | -7.18065 | 0.31020774 |
| Aminobutyric acid                | 119       | -3.843  | -10.5 | -7.1715  | 4.70720984 |
| Vanillic acid                    | 8468      | -4.2275 | -10.1 | -7.16375 | 4.15248457 |
| Kavain                           | 5281565   | -5.1955 | -9.1  | -7.14775 | 2.76089843 |
| 6-aminochrysene                  | 17534     | -5.1614 | -9.1  | -7.1307  | 2.78501077 |
| Phenylalanine                    | 6140      | -4.8314 | -9.2  | -7.0157  | 3.08906668 |
| Kaempferol pentoside             | 14749097  | -6.4984 | -7.5  | -6.9992  | 0.70823815 |
| Isopilosine                      | 72312     | -6.2557 | -7.7  | -6.97785 | 1.02127432 |
| Isopropyl dodecanoate            | 25068     | -6.5275 | -7.4  | -6.96375 | 0.61695067 |
| Succinic acid                    | 1110      | -3.6245 | -10.3 | -6.96225 | 4.72029132 |
| Alpha-tocotrienol                | 5282347   | -7.6184 | -6.3  | -6.9592  | 0.93224958 |
| 8-dehydrogingerdione             | 131752598 | -6.7783 | -7.1  | -6.93915 | 0.22747625 |
| Carvacrol                        | 10364     | -4.8738 | -9    | -6.9369  | 2.917664   |
| Choline                          | 305       | -4.1386 | -9.7  | -6.9193  | 3.93250365 |
| 10-gingerdione                   | 5317591   | -6.6196 | -7.2  | -6.9098  | 0.41040478 |
| (+)-Neo-olivil                   | 9976812   | -6.3853 | -7.4  | -6.89265 | 0.71750125 |
| Incensole oxide acetate          | 73755086  | -5.884  | -7.9  | -6.892   | 1.42552727 |
| Salicylic alcohol                | 5146      | -4.0357 | -9.7  | -6.86785 | 4.00526494 |
| Hecogenin                        | 91453     | -6.5983 | -7.1  | -6.84915 | 0.35475547 |
| 1,2-Diguaiacyl-1,3-propanediol   | 6426042   | -6.6885 | -7    | -6.84425 | 0.22026376 |
| Myristic acid                    | 11005     | -5.8632 | -7.8  | -6.8316  | 1.36952441 |
| Sitosterol- $\beta$ -D-glucoside | 91884650  | -7.9608 | -5.7  | -6.8304  | 1.59862701 |
| Neochlorogenic acid              | 5280633   | -6.2118 | -7.4  | -6.8059  | 0.84018428 |
| Niacinamide                      | 936       | -3.7997 | -9.8  | -6.79985 | 4.24285282 |
| Apigenin-7-O-glucoside           | 44257792  | -6.2744 | -7.3  | -6.7872  | 0.72520871 |
| Podocarpic acid                  | 93017     | -5.0645 | -8.5  | -6.78225 | 2.42926535 |
| 4-O-Caffeoylquinic acid          | 58427569  | -6.1609 | -7.4  | -6.78045 | 0.87617601 |
| Osthole                          | 10228     | -6.0402 | -7.5  | -6.7701  | 1.03223448 |
| Phytosterols                     | 12303662  | -7.3182 | -6.2  | -6.7591  | 0.7906868  |
| Catechin                         | 9064      | -6.27   | -7.2  | -6.735   | 0.65760931 |
| Peonidin 3-O-rutinoside          | 44256842  | -7.4297 | -6    | -6.71485 | 1.01095057 |
| $\beta$ -Selinene                | 442393    | -5.9182 | -7.5  | -6.7091  | 1.11850151 |
| Vitamin B5                       | 6613      | -5.2423 | -8    | -6.62115 | 1.94998837 |

|                                                             |           |         |      |          |            |
|-------------------------------------------------------------|-----------|---------|------|----------|------------|
| Esculetin                                                   | 5281416   | -4.8241 | -8.4 | -6.61205 | 2.52854314 |
| 3,4-dimethoxychalcone                                       | 5354494   | -5.4976 | -7.7 | -6.5988  | 1.55733197 |
| Eugenol                                                     | 3314      | -4.7865 | -8.4 | -6.59325 | 2.55513035 |
| Caffeoyl feruloyl tartaric acid                             | 129724266 | -7.3494 | -5.8 | -6.5747  | 1.09559125 |
| $\delta$ -Cadinene                                          | 441005    | -5.7434 | -7.4 | -6.5717  | 1.17139309 |
| Caffeoyl tartaric acid                                      | 9857913   | -5.4369 | -7.7 | -6.56845 | 1.60025336 |
| Farnesylacetone                                             | 1711945   | -6.5233 | -6.6 | -6.56165 | 0.05423509 |
| Chlorogenic acid                                            | 1794427   | -5.6932 | -7.4 | -6.5466  | 1.20688985 |
| Catechin hydrate                                            | 107957    | -5.6771 | -7.4 | -6.53855 | 1.21827427 |
| Quinic acid                                                 | 6508      | -4.2436 | -8.8 | -6.5218  | 3.22186134 |
| [1,1-Bicyclopropyl-2-octanoic acid 2hexyl-methyl ester      | 50930793  | -6.9073 | -6.1 | -6.50365 | 0.5708473  |
| Caffeoylquinic acid                                         | 10155076  | -6.1991 | -6.8 | -6.49955 | 0.42490046 |
| $\beta$ -Bisabolene                                         | 10104370  | -5.7508 | -7.2 | -6.4754  | 1.02473915 |
| $\alpha$ -Copaene                                           | 442355    | -5.4413 | -7.5 | -6.47065 | 1.45572073 |
| $\gamma$ -Cadinene                                          | 92313     | -5.6146 | -7.3 | -6.4573  | 1.19175777 |
| 4-shogaol                                                   | 9794897   | -5.9798 | -6.9 | -6.4399  | 0.65067966 |
| Rutin                                                       | 5280805   | -8.5605 | -4.3 | -6.43025 | 3.01262844 |
| $\alpha$ -Selinene                                          | 10856614  | -5.3092 | -7.5 | -6.4046  | 1.54912954 |
| Calamenene                                                  | 6429077   | -5.58   | -7.2 | -6.39    | 1.14551299 |
| Pukateine                                                   | 442340    | -5.6293 | -7.1 | -6.36465 | 1.03994194 |
| 9-Hydroxy-10,12-octadecadienoic acid                        | 1927      | -6.4157 | -6.3 | -6.35785 | 0.08181225 |
| Flavone                                                     | 10680     | -5.013  | -7.7 | -6.3565  | 1.89999592 |
| Abscisic acid                                               | 5375199   | -5.8066 | -6.9 | -6.3533  | 0.77315055 |
| $\beta$ - Vetivenene                                        | 14475467  | -5.0902 | -7.6 | -6.3451  | 1.7746966  |
| Luteolin                                                    | 5280445   | -5.1511 | -7.5 | -6.32555 | 1.66092312 |
| 6-benzylaminopurine                                         | 62389     | -5.5296 | -7.1 | -6.3148  | 1.11044049 |
| Pyrogallol                                                  | 1057      | -3.9165 | -8.7 | -6.30825 | 3.38244529 |
| Ursolic acid                                                | 64945     | -6.7729 | -5.8 | -6.28645 | 0.68794419 |
| Epicatechin                                                 | 72276     | -5.637  | -6.9 | -6.2685  | 0.89307586 |
| Homovanillyl alcohol                                        | 16928     | -4.9337 | -7.6 | -6.26685 | 1.88535881 |
| Arbutine                                                    | 440936    | -5.5176 | -7   | -6.2588  | 1.04821509 |
| Indole                                                      | 798       | -3.9141 | -8.6 | -6.25705 | 3.31343167 |
| 4-(4-Hydroxy-2,6,6-trimethyl1-cyclohexen-1-yl)-3-buten2-one | 538953    | -5.8071 | -6.7 | -6.25355 | 0.63137564 |
| $\beta$ -Bourbonene                                         | 62566     | -5.379  | -7.1 | -6.2395  | 1.21693077 |
| $\beta$ -Caryophyllene                                      | 5281515   | -5.3772 | -7.1 | -6.2386  | 1.21820356 |
| $\beta$ - Sesquiphellandrene                                | 519764    | -5.6425 | -6.8 | -6.22125 | 0.8184761  |
| $\alpha$ -Humulene                                          | 5281520   | -5.3147 | -7.1 | -6.20735 | 1.26239774 |
| Caffeoylmalic acid                                          | 6124299   | -5.4902 | -6.9 | -6.1951  | 0.99687914 |



|                                                                       |          |         |      |          |            |
|-----------------------------------------------------------------------|----------|---------|------|----------|------------|
| 1,2-Benzenedicarboxylic acid                                          | 90531    | -5.578  | -6.8 | -6.189   | 0.86408449 |
| Silane, triethyl(2-phenylethoxy)                                      | 610043   | -5.6576 | -6.7 | -6.1788  | 0.73708811 |
| Methyl palmitate                                                      | 8181     | -6.6989 | -5.6 | -6.14945 | 0.77703964 |
| cis-10-Heptadecenoic acid                                             | 5312435  | -6.286  | -6   | -6.143   | 0.20223254 |
| $\alpha$ -Longipinene                                                 | 520957   | -5.2074 | -7   | -6.1037  | 1.26755962 |
| Violaxanthin                                                          | 448438   | -6.9924 | -5.2 | -6.0962  | 1.26741819 |
| Eleutheroside B                                                       | 5316860  | -6.5861 | -5.6 | -6.09305 | 0.697278   |
| 2H-Indeno[1,2-b]furan-2-one, 3,3a,4,5,6,7,8,8b-octahydro-8,8-dimethyl | 605626   | -5.162  | -7   | -6.081   | 1.29966226 |
| Proline                                                               | 145742   | -3.7556 | -8.4 | -6.0778  | 3.28408673 |
| Borneol                                                               | 64685    | -4.0251 | -8.1 | -6.06255 | 2.88138942 |
| Harmol                                                                | 68094    | -5.009  | -7.1 | -6.0545  | 1.47856028 |
| 3-Hydroxy-damascone                                                   | 5366075  | -5.5994 | -6.5 | -6.0497  | 0.63682037 |
| 4-(3-Hydroxy-1-butyln-1-yl)-3,5,5-trimethyl-2-cyclohexen-1-ol         | 5280654  | -5.8612 | -6.2 | -6.0306  | 0.23956778 |
| Anthranilic acid methyl ester                                         | 8635     | -4.2414 | -7.8 | -6.0207  | 2.51631019 |
| Arabitol                                                              | 94154    | -4.1238 | -7.9 | -6.0119  | 2.67017663 |
| Palmitic acid                                                         | 985      | -6.621  | -5.4 | -6.0105  | 0.86337738 |
| 4-methyl-7-ethoxycoumarin                                             | 66595    | -5.2972 | -6.7 | -5.9986  | 0.99192939 |
| Cumin aldehyde                                                        | 326      | -4.4513 | -7.5 | -5.97565 | 2.15575644 |
| Caryophyllene oxide                                                   | 1742210  | -5.5094 | -6.4 | -5.9547  | 0.6297493  |
| $\alpha$ -Terpinyl acetate                                            | 111037   | -5.4041 | -6.5 | -5.95205 | 0.77491832 |
| $\alpha$ -Curcumene                                                   | 92139    | -5.4835 | -6.4 | -5.94175 | 0.64806336 |
| Ferulic acid                                                          | 445858   | -4.7655 | -7.1 | -5.93275 | 1.65074078 |
| $\beta$ -Ionone                                                       | 638014   | -5.4608 | -6.4 | -5.9304  | 0.66411469 |
| (E)-Geranyl acetone                                                   | 1713001  | -5.7356 | -6.1 | -5.9178  | 0.25766971 |
| Dimethyl-L-tartrate                                                   | 11851    | -4.6312 | -7.2 | -5.9156  | 1.8164159  |
| Carnosol                                                              | 442009   | -6.1763 | -5.6 | -5.88815 | 0.40750564 |
| Linolenic acid                                                        | 5280934  | -6.4517 | -5.3 | -5.87585 | 0.81437488 |
| Deoxyharringtonine                                                    | 285342   | -7.0439 | -4.7 | -5.87195 | 1.65738758 |
| Myristoleic acid                                                      | 5281119  | -5.8346 | -5.9 | -5.8673  | 0.04624478 |
| Estra-1,3,5(10)-trien-17B-ol                                          | 9811784  | -5.6215 | -6.1 | -5.86075 | 0.33835059 |
| Phytol                                                                | 5280435  | -7.086  | -4.6 | -5.843   | 1.75786746 |
| Flavan                                                                | 94156    | -5.0825 | -6.6 | -5.84125 | 1.07303454 |
| Camphor                                                               | 2537     | -3.8695 | -7.8 | -5.83475 | 2.7792832  |
| Incensole oxide                                                       | 90470329 | -6.0561 | -5.6 | -5.82805 | 0.3225114  |
| p-Cymene                                                              | 7463     | -4.756  | -6.9 | -5.828   | 1.51603694 |

|                                               |           |         |      |          |            |
|-----------------------------------------------|-----------|---------|------|----------|------------|
| Resorcinol                                    | 5054      | -3.447  | -8.2 | -5.8235  | 3.36087853 |
| Mannitol                                      | 6251      | -4.1127 | -7.5 | -5.80635 | 2.3951828  |
| Farnesol                                      | 445070    | -5.9907 | -5.6 | -5.79535 | 0.27626662 |
| Lotaustralin                                  | 441467    | -5.2855 | -6.3 | -5.79275 | 0.71735983 |
| Feruloyl malate                               | 71694479  | -5.5754 | -6   | -5.7877  | 0.30023754 |
| Oxime- methoxy-phenyl                         | 9602988   | -4.2618 | -7.3 | -5.7809  | 2.14833182 |
| $\alpha$ -Ionone                              | 5282108   | -5.3832 | -6.1 | -5.7416  | 0.50685414 |
| p-Coumaroylmalic acid                         | 129720114 | -5.6708 | -5.8 | -5.7354  | 0.0913582  |
| $\alpha$ -Copaene-8-ol                        | 25086830  | -5.664  | -5.8 | -5.732   | 0.09616652 |
| Dodecendioic acid                             | 5283028   | -5.6541 | -5.8 | -5.72705 | 0.10316688 |
| Isorhamnetin                                  | 5281654   | -5.753  | -5.7 | -5.7265  | 0.03747666 |
| 1-Dodecanamine, N, N-dimethyl                 | 8168      | -6.0455 | -5.4 | -5.72275 | 0.45643743 |
| Carvylacetate                                 | 7335      | -5.641  | -5.8 | -5.7205  | 0.11242998 |
| Naringenin                                    | 932       | -5.409  | -6   | -5.7045  | 0.41790011 |
| Kaempferol                                    | 5280863   | -5.3012 | -6.1 | -5.7006  | 0.5648369  |
| 4-methylmethoxycoumarin                       | 223821    | -5.1011 | -6.3 | -5.70055 | 0.84775032 |
| Palmitoleic acid                              | 445638    | -6.3994 | -5   | -5.6997  | 0.98952523 |
| Gentisic acid                                 | 3469      | -4.2903 | -7.1 | -5.69515 | 1.98675792 |
| DL-a aminopimelic acid                        | 101122    | -4.4749 | -6.9 | -5.68745 | 1.71480466 |
| Convolvamine                                  | 420422    | -5.7703 | -5.6 | -5.68515 | 0.12042028 |
| Integerrimine                                 | 5281733   | -5.8574 | -5.5 | -5.6787  | 0.25271996 |
| Carvone                                       | 7439      | -4.7445 | -6.6 | -5.67225 | 1.31203663 |
| Lutein                                        | 5281243   | -7.0445 | -4.3 | -5.67225 | 1.94065456 |
| 3,4-Dimethyl-5-pentylidene-2(5H)-furanone     | 6433214   | -5.3365 | -6   | -5.66825 | 0.46916535 |
| Sinapyl alcohol                               | 5280507   | -5.4247 | -5.9 | -5.66235 | 0.33608785 |
| Carvacryl acetate                             | 80792     | -5.2166 | -6.1 | -5.6583  | 0.62465813 |
| 3-Oxo-a-ionol                                 | 5370052   | -4.8799 | -6.4 | -5.63995 | 1.07487302 |
| L-2-aminoadipic acid                          | 92136     | -4.447  | -6.8 | -5.6235  | 1.66382226 |
| Phosphatidylcholine                           | 10425706  | -5.7195 | -5.5 | -5.60975 | 0.15520994 |
| 4-aminoantipyrine                             | 2151      | -4.7761 | -6.4 | -5.58805 | 1.1482707  |
| Isopropyl- $\beta$ -D-thio-galacto-pyranoside | 656894    | -5.4478 | -5.7 | -5.5739  | 0.17833233 |
| 3,4-Dimethyl-5-pentylfuran-2(5H)-one          | 13192443  | -5.3792 | -5.7 | -5.5396  | 0.22683986 |
| 1-Methyl naphthalene                          | 7002      | -4.5469 | -6.5 | -5.52345 | 1.38105025 |
| Cinnamyl acetate                              | 5282110   | -5.2274 | -5.8 | -5.5137  | 0.40488934 |
| Methyl eugenol                                | 7127      | -5.4876 | -5.5 | -5.4938  | 0.00876812 |
| Decan-2-one                                   | 12741     | -5.0637 | -5.9 | -5.48185 | 0.5913534  |
| Tachioside                                    | 11962143  | -5.6605 | -5.3 | -5.48025 | 0.25491199 |
| Benzaldehyde                                  | 240       | -3.7431 | -7.2 | -5.47155 | 2.44439743 |

|                                                         |          |         |      |          |            |
|---------------------------------------------------------|----------|---------|------|----------|------------|
| adenine                                                 | 190      | -3.7244 | -7.2 | -5.4622  | 2.45762033 |
| Secoisolariciresinol                                    | 65373    | -6.2135 | -4.7 | -5.45675 | 1.07020611 |
| Thymol                                                  | 6989     | -4.5802 | -6.3 | -5.4401  | 1.21608224 |
| Hexahydrofarnesylacetone                                | 10408    | -6.5722 | -4.3 | -5.4361  | 1.60668803 |
| Caffeic acid                                            | 689043   | -4.6311 | -6.2 | -5.41555 | 1.10937983 |
| 1,2-O-isopropylidene-D-glucoside                        | 87704    | -5.1208 | -5.7 | -5.4104  | 0.40955625 |
| Hydroxycinnamaldehyde                                   | 71407359 | -4.3221 | -6.4 | -5.36105 | 1.46929718 |
| Creatinine                                              | 588      | -3.6165 | -7.1 | -5.35825 | 2.46320647 |
| Myricetin                                               | 5281672  | -5.5059 | -5.2 | -5.35295 | 0.21630396 |
| Apigenin                                                | 5280443  | -5.4571 | -5.2 | -5.32855 | 0.18179715 |
| $\alpha$ - Terpineol                                    | 17100    | -4.909  | -5.7 | -5.3045  | 0.55932146 |
| p-coumaric acid                                         | 637542   | -4.5887 | -6   | -5.29435 | 0.9979398  |
| Scopoletin                                              | 5280460  | -5.0647 | -5.5 | -5.28235 | 0.30780358 |
| 1-Hydroxy-1-(4-hydroxyphenyl)-2-propanone               | 10261435 | -5.0526 | -5.5 | -5.2763  | 0.31635957 |
| Geranyl acetone                                         | 1549778  | -5.4337 | -5.1 | -5.26685 | 0.23596153 |
| O-Feruloyl quinic acid                                  | 10177048 | -5.8298 | -4.7 | -5.2649  | 0.79888924 |
| Carnosine                                               | 439224   | -4.9741 | -5.5 | -5.23705 | 0.37186746 |
| n-acetyl-L-glutamine                                    | 182230   | -4.4594 | -6   | -5.2297  | 1.08936871 |
| $\beta$ -Homocyclocitral                                | 61124    | -4.8342 | -5.6 | -5.2171  | 0.54150237 |
| Arachidonic acid                                        | 444899   | -6.7279 | -3.7 | -5.21395 | 2.14104862 |
| Formic acid                                             | 284      | -2.609  | -7.8 | -5.2045  | 3.6705913  |
| Hydrocotarnine                                          | 3646     | -5.3011 | -5.1 | -5.20055 | 0.14219917 |
| Quercetin                                               | 5280343  | -5.7987 | -4.6 | -5.19935 | 0.8476089  |
| m-Hydroxy-acetophenone                                  | 8487     | -4.0782 | -6.3 | -5.1891  | 1.57104985 |
| 2(3H)-Naphthalenone, 4, 4a,5,6,7,8- hexahydro-1-methoxy | 534313   | -4.7437 | -5.6 | -5.17185 | 0.60549554 |
| Genistein                                               | 5280961  | -5.2302 | -5.1 | -5.1651  | 0.0920653  |
| Benzyl salicilate                                       | 8363     | -5.2847 | -5   | -5.14235 | 0.2013133  |
| 4-Acetyl-2-methylphenol                                 | 70135    | -4.5647 | -5.7 | -5.13235 | 0.80277833 |
| Tyrosol                                                 | 10393    | -4.3361 | -5.9 | -5.11805 | 1.1058443  |
| Syringic acid                                           | 10742    | -5.0142 | -5.2 | -5.1071  | 0.13138044 |
| (E)-Anethole                                            | 637563   | -4.5952 | -5.6 | -5.0976  | 0.71050089 |
| Methylcoumarin                                          | 17130    | -4.4802 | -5.7 | -5.0901  | 0.86252885 |
| Cinnamide                                               | 5273472  | -4.5747 | -5.6 | -5.08735 | 0.72499658 |
| Bornyl acetate                                          | 6448     | -4.9742 | -5.2 | -5.0871  | 0.15966471 |
| Hexanal                                                 | 6184     | -4.1511 | -6   | -5.07555 | 1.30736973 |
| DL-methyl-m-tyrosine                                    | 2110     | -5.0145 | -5.1 | -5.05725 | 0.06045763 |
| Decanal                                                 | 8175     | -5.0991 | -5   | -5.04955 | 0.07007428 |
| Glucosamine                                             | 439213   | -4.1962 | -5.9 | -5.0481  | 1.20476853 |
| Citric acid                                             | 311      | -4.2927 | -5.8 | -5.04635 | 1.06582205 |

|                                                        |         |         |      |          |            |
|--------------------------------------------------------|---------|---------|------|----------|------------|
| Lauric acid                                            | 3893    | -5.4902 | -4.6 | -5.0451  | 0.62946646 |
| $\beta$ -Cyclocitral                                   | 9895    | -4.4352 | -5.6 | -5.0176  | 0.82363798 |
| 2-Pentylfuran                                          | 19602   | -5.0254 | -5   | -5.0127  | 0.01796051 |
| 2-(1-Pentenyl)furan                                    | 5369956 | -4.9239 | -5.1 | -5.01195 | 0.1245215  |
| Sinapic acid                                           | 637775  | -5.1094 | -4.9 | -5.0047  | 0.14806816 |
| Shikimic acid                                          | 8742    | -3.9934 | -6   | -4.9967  | 1.41888047 |
| Leucine                                                | 6106    | -4.3489 | -5.6 | -4.97445 | 0.88466129 |
| Pterostilbene                                          | 5281727 | -5.6394 | -4.3 | -4.9697  | 0.94709882 |
| p-Hydroxy-acetophenone                                 | 7469    | -4.2674 | -5.6 | -4.9337  | 0.9422905  |
| 4-Vinyl guaiacol                                       | 332     | -4.5618 | -5.3 | -4.9309  | 0.52198623 |
| Anthocyanins                                           | 145858  | -5.1165 | -4.7 | -4.90825 | 0.29450997 |
| 2,4,6-Trimethyl-5H-1,3,5-dithiazine                    | 12518   | -4.2078 | -5.6 | -4.9039  | 0.98443406 |
| Synephrine                                             | 7172    | -5.3322 | -4.4 | -4.8661  | 0.65916494 |
| Nonanol                                                | 8914    | -5.2117 | -4.5 | -4.85585 | 0.5032479  |
| Homatropine                                            | 5282593 | -5.4974 | -4.2 | -4.8487  | 0.91740034 |
| 2, 6,-Nonadienal, 3, 7-dimethyl                        | 5364526 | -5.3957 | -4.3 | -4.84785 | 0.7747769  |
| Umbelliferone                                          | 5281426 | -4.6106 | -5   | -4.8053  | 0.27534738 |
| 5,6-Dihydro-4-pentyl- 2,6-dimethyl-4H-1,3,5-dithiazine | 528360  | -4.7002 | -4.9 | -4.8001  | 0.14127993 |
| Coniferol                                              | 1549095 | -5.0621 | -4.5 | -4.78105 | 0.39746472 |
| Cryoeriol                                              | 5280666 | -5.4412 | -4.1 | -4.7706  | 0.94837161 |
| Heptanal                                               | 8130    | -4.1084 | -5.4 | -4.7542  | 0.91329912 |
| 2,6-Dimethoxy-hydroquinone                             | 96038   | -4.4926 | -5   | -4.7463  | 0.35878598 |
| 4-deoxypyridoxine                                      | 6094    | -4.5608 | -4.9 | -4.7304  | 0.23985062 |
| L-threonine                                            | 6288    | -3.8652 | -5.5 | -4.6826  | 1.15597817 |
| Diphenyl                                               | 7095    | -4.7619 | -4.6 | -4.68095 | 0.11448059 |
| Adenosine                                              | 60961   | -4.729  | -4.6 | -4.6645  | 0.09121677 |
| Acetophenone                                           | 7410    | -4.0987 | -5.2 | -4.64935 | 0.7787367  |
| Indole-3-carboxaldehyde                                | 10256   | -4.2786 | -5   | -4.6393  | 0.51010683 |
| Harmine                                                | 5280953 | -5.0662 | -4.2 | -4.6331  | 0.61249589 |
| Rhamnose                                               | 25310   | -4.1071 | -5.1 | -4.60355 | 0.70208632 |
| Phthalic acid                                          | 1017    | -4.1274 | -5   | -4.5637  | 0.61702138 |
| 3-Octanone                                             | 246728  | -4.5131 | -4.6 | -4.55655 | 0.06144758 |
| p-Hydroxybenzyl alcohol                                | 125     | -4.0127 | -5.1 | -4.55635 | 0.7688372  |
| Nonanal                                                | 31289   | -4.608  | -4.5 | -4.554   | 0.07636753 |
| Linalool                                               | 6549    | -5.0963 | -4   | -4.54815 | 0.77520116 |
| n-Octanal                                              | 454     | -4.4863 | -4.6 | -4.54315 | 0.08039804 |
| Safranal                                               | 61041   | -4.3466 | -4.7 | -4.5233  | 0.24989154 |
| 3,4-Dihydroxybenzoic acid                              | 72      | -3.9448 | -5.1 | -4.5224  | 0.81684975 |
| Naphthalene                                            | 931     | -4.1375 | -4.9 | -4.51875 | 0.53916892 |

|                                |          |         |      |          |            |
|--------------------------------|----------|---------|------|----------|------------|
| p-Hydroxy-benzaldehyde         | 126      | -3.7679 | -5.2 | -4.48395 | 1.01264762 |
| Methyl chavicol                | 8815     | -4.7947 | -4.1 | -4.44735 | 0.49122708 |
| 1,6-dioxaspiro[4.4]non-3-ene   | 10374471 | -4.0949 | -4.7 | -4.39745 | 0.42787031 |
| 3-hydroxy-2,3 dihydromaltol    | 119838   | -4.1745 | -4.5 | -4.33725 | 0.23016326 |
| Levulinic acid                 | 11579    | -3.8395 | -4.8 | -4.31975 | 0.67917606 |
| Gallic acid                    | 370      | -4.1275 | -4.4 | -4.26375 | 0.1926866  |
| 2-Heptanone                    | 8051     | -4.1249 | -4.4 | -4.26245 | 0.19452508 |
| p-hydroxybenzoic acid          | 135      | -3.7817 | -4.7 | -4.24085 | 0.64933616 |
| Benzofuran, 2,3-dihydro        | 10329    | -3.8269 | -4.6 | -4.21345 | 0.54666425 |
| Glutaric acid                  | 743      | -3.7356 | -4.5 | -4.1178  | 0.54051242 |
| Levogluconan                   | 2724705  | -3.8328 | -4.4 | -4.1164  | 0.40107097 |
| 2-acetylpyrrole                | 14079    | -3.8702 | -4.3 | -4.0851  | 0.30391449 |
| Histidinol                     | 776      | -4.1646 | -3.9 | -4.0323  | 0.18710045 |
| 1,4-benzoquinone               | 4650     | -3.5998 | -4.4 | -3.9999  | 0.56582685 |
| 6-azacytosine                  | 70265    | -3.3645 | -4.6 | -3.98225 | 0.87363043 |
| Anisaldehyde                   | 31244    | -3.9278 | -3.9 | -3.9139  | 0.01965757 |
| 1, 2, 3-Butanetriol            | 20497    | -3.8812 | -3.8 | -3.8406  | 0.05741707 |
| 2-deoxy-D-ribose               | 5460005  | -3.7603 | -3.9 | -3.83015 | 0.09878282 |
| Cinnamic acid                  | 444539   | -4.4157 | -3   | -3.70785 | 1.00105107 |
| 3,5-Dimethyl-1,2,4-trithiolane | 32033    | -3.8905 | -3.3 | -3.59525 | 0.41754655 |
| Galactal                       | 2734735  | -4.0501 | -2.9 | -3.47505 | 0.81324351 |

**Table S6.** The affinity values and residues of HR1 that interacted with fexofenadine and the best 15 molecules, with both software.

| Phytochemical                  | Mean Value of Affinity | Software | Affinity Value | Residues                                                                                                            | Number of residues forming interactions | Number of repeated residues |
|--------------------------------|------------------------|----------|----------------|---------------------------------------------------------------------------------------------------------------------|-----------------------------------------|-----------------------------|
| 7 $\alpha$ -Hydroxy sitosterol | -7.465                 | MOE      | -6.230         | <b>Phe116, Leu154, Leu157, Trp158,</b> Ile160, His167, Phe168, Trp189, <b>Phe190, Thr194, Ile197,</b> Asn198        | 12                                      | 7                           |
|                                |                        | AutoVina | -8.7           | <b>Phe116,</b> Phe119, Ala151, <b>Leu154, Leu157, Trp158,</b> Pro161, <b>Phe190, Thr194, Ile197,</b> Leu201, Pro202 | 12                                      |                             |
| $\beta$ -Sitosterol            | -7.387                 | MOE      | -6.075         | <b>Leu154, Leu157, Trp158,</b> Ile160, <b>Pro161,</b> His167, Phe168, Trp189, <b>Phe190, Thr194, Ile197</b>         | 10                                      | 5                           |
|                                |                        | AutoVina | -8.7           | Phe116, Phe119, Ala151, <b>Leu154, Leu157, Trp158, Pro161, Phe190, Ile197,</b> Leu201, Pro202                       | 10                                      |                             |
| $\gamma$ -sitosterol           | -7.337                 | MOE      | -6.075         | <b>Phe116, Leu154, Leu157, Trp158,</b> Ile160, <b>Pro161,</b> His167, Phe168, Trp189, <b>Phe190, Met193, Ile197</b> | 12                                      | 7                           |

|                        |        |          |        |                                                                                                                               |    |    |
|------------------------|--------|----------|--------|-------------------------------------------------------------------------------------------------------------------------------|----|----|
|                        |        | AutoVina | -8.6   | <b>Phe116, Phe119, Leu154, Leu157, Trp158, Pro161, Phe190, Ile197, Leu201, Pro202</b>                                         | 10 |    |
| Phytosterols           | -7.331 | MOE      | -5.962 | <b>Leu154, Leu157, Trp158, Ile160, Pro161, His 167, Trp189, Phe190, Met193, Thr194, Ile197</b>                                | 11 | 6  |
|                        |        | AutoVina | -8.7   | <b>Phe116, Phe119, Leu154, Leu157, Trp158, Pro161, Phe190, Ile197, Leu201, Pro202</b>                                         | 10 |    |
| Fexofenadine           | -7.311 | MOE      | -6.522 | <b>Leu154, Leu157, Trp158, Ile160, Pro161, His167, Trp189, Phe190, Met193, Thr194, Ile197, Asn198</b>                         | 12 | 7  |
|                        |        | AutoVina | -8.1   | <b>Phe116, Phe119, Leu154, Leu157, Trp158, Ile160, Pro161, Phe190, Ile197, Pro202</b>                                         | 10 |    |
| Alpha-tocotrienol      | -7.310 | MOE      | -6.821 | <b>Phe116, Leu154, Leu157, Trp158, Ile160, Pro161, His167, Phe168, Trp189, Phe190, Met193, Thr194, Ile197, Asn198</b>         | 14 | 9  |
|                        |        | AutoVina | -7.8   | <b>Phe116, Phe119, Ala151, Leu154, Ile157, Trp158, Pro161, Phe190, Met193, Thr194, Ile197, Pro202</b>                         | 12 |    |
| Cholecalciferol        | -7.294 | MOE      | -6.088 | <b>Phe116, Leu154, Leu157, Trp158, Ile160, Pro161, His167, Phe190, Met193, Thr194, Ile197</b>                                 | 11 | 9  |
|                        |        | AutoVina | -8.5   | <b>Phe116, Ile120, Gly150, Ala151, Leu154, Leu157, Trp158, Pro161, Phe190, Met193, Thr194, Ile197, Asn198,</b>                | 13 |    |
| Solanidine             | -7.234 | MOE      | -5.369 | <b>Phe116, Leu154, Leu157, Trp158, Ile160, Pro161, His167, Phe190, Met193, Ile197</b>                                         | 10 | 8  |
|                        |        | AutoVina | -9.1   | <b>Phe116, Leu154, Leu157, Trp158, Pro161, Phe190, Met193, Thr194, Ile197</b>                                                 | 9  |    |
| Hecogenin              | -7.091 | MOE      | -5.183 | <b>Phe116, Leu154, Leu157, Trp158, Ile160, Pro161, His167, Phe190, Ile197</b>                                                 | 9  | 8  |
|                        |        | AutoVina | -9     | <b>Phe116, Leu154, Leu157, Trp158, Ile160, Pro161, Phe190, Ile197, Asn198, Leu201</b>                                         | 10 |    |
| Apigenin-7-O-glucoside | -6.892 | MOE      | -5.884 | <b>Thr112, Phe116, Leu154, Leu157, Trp158, Ile160, Pro161, Phe168, Phe190, Met193, Thr194, Ile197, Asn198</b>                 | 13 | 9  |
|                        |        | AutoVina | -7.9   | <b>Phe116, Phe119, Ile120, Ala151, Leu154, Ser155, Leu157, Trp158, Ile160, Pro161, Phe190, Thr194, Ile197</b>                 | 13 |    |
| Neoxanthin             | -6.856 | MOE      | -7.112 | <b>Phe116, Leu154, Leu157, Trp158, Ile160, Pro161, His167, Phe168, Met169, Gln170, Val187, Trp189, Phe190, Met193, Ile197</b> | 15 | 8  |
|                        |        | AutoVina | -6.6   | <b>Phe116, Phe119, Leu154, Leu157, Trp158, Pro161, Phe190, Met193, thr194, Ile197, Pro202</b>                                 | 11 |    |
| Piperine               | -6.704 | MOE      | -5.409 | <b>Thr112, Phe116, Leu154, Leu157, Trp158, Ile160, Pro161, His167, Trp189, Phe190, Ile197, Asn198</b>                         | 12 | 7  |
|                        |        | AutoVina | -8     | <b>Phe116, Phe119, Ile120, Ala151, Leu154, Leu157, Trp158, Pro161, Phe190, Thr194, Ile197</b>                                 | 11 |    |
| 8-dehydrogingerdione   | -6.698 | MOE      | -6.296 | <b>Thr112, Phe116, Leu154, Ser155, Leu157, Trp158, Ile160, Pro161, His167, Phe168, Trp189, Phe190, Met193, Thr194, Ile197</b> | 15 | 10 |
|                        |        | AutoVina | -7.1   | <b>Thr112, Phe116, Phe119, Ala151, Leu154, Leu157, Trp158, Pro161,</b>                                                        | 13 |    |

|                       |        |          |        |                                                                                                                               |    |   |
|-----------------------|--------|----------|--------|-------------------------------------------------------------------------------------------------------------------------------|----|---|
|                       |        |          |        | <b>Phe190, Met193, Thr194, Ile197, Asn198</b>                                                                                 |    |   |
| 6-aminochrysene       | -6.646 | MOE      | -4.493 | <b>Phe116, Leu154, Leu157, Trp158, Pro161, Phe190, Met193, Ile197</b>                                                         | 8  | 7 |
|                       |        | AutoVina | -8.8   | <b>Phe116, Leu154, Leu157, Trp158, Pro161, Phe190, Thr194, Ile197, Asn198</b>                                                 | 9  |   |
| Chlorogenic acid      | -6.633 | MOE      | -5.966 | Thr112, <b>Phe116, Leu154, Ser155, Leu157, Trp158, Ile160, Pro161, His167, Phe168, Trp189, Phe190, Thr194, Ile197, Asn198</b> | 15 | 9 |
|                       |        | AutoVina | -7.3   | <b>Phe116, Phe119, Leu154, Leu157, Trp158, Pro161, Phe190, Met193, Thr194, Ile197, Asn198, Leu201, Pro202</b>                 | 13 |   |
| 3,4-dimethoxychalcone | -6.611 | MOE      | -5.322 | <b>Phe116, Leu154, Leu157, Trp158, Pro161, His167, Phe168, Trp189, Phe190, Met193, Thr194, Ile197, Asn198</b>                 | 13 | 7 |
|                       |        | AutoVina | -7.9   | <b>Phe116, Phe119, Leu154, Leu157, Trp158, Thr194, Ile197, Asn198, Pro202</b>                                                 | 9  |   |

The residues in bold are the residues that form interactions with the molecule in both software.

**Table S7.** The affinity values and residues of NKR1 that interacted with Aprepitant and the best 15 molecules, with both software.

| Phytochemical           | Mean Value of Affinity | Software | Affinity Value | Residues                                                                                                                                                                                 | Number of residues forming interactions | Number of repeated residues |
|-------------------------|------------------------|----------|----------------|------------------------------------------------------------------------------------------------------------------------------------------------------------------------------------------|-----------------------------------------|-----------------------------|
| Amentoflavone           | -9.604                 | MOE      | -8.209         | <b>Asn89, Tyr92, Ala93, His108, Asn109, Pro112, Ile113, Val116, Phe164, Gln165, Cys180, Ile182, His197, Thr201, Ile204, His265, Phe267, Phe268, Pro271, Tyr287</b>                       | 20                                      | 12                          |
|                         |                        | AutoVina | -11            | <b>Asn89, Tyr92, Ala93, Asn96, Asn109, Pro112, Ile113, Gln165, Ile182, Glu193, His197, Phe267, Phe268, Tyr272, Tyr287</b>                                                                | 15                                      |                             |
| Aprepitant              | -9.039                 | MOE      | -7.678         | <b>Asn89, His108, Asn109, Pro112, Ile113, Val116, Gln165, Ile182, Trp184, Glu193, Tyr196, His197, Ile204, Trp261, Phe264, Phe268, Tyr272, Tyr287</b>                                     | 18                                      | 12                          |
|                         |                        | AutoVina | -10.4          | Met81, Val88, <b>Asn89, Tyr92, Ala93, His108, Asn109, Pro112, Ile113, Gln165, Cys180, Ile182, His197, Val200, Thr201, Ile204, Trp261, Phe264, His265, Phe268, Tyr287, Met291, Met295</b> | 23                                      |                             |
| Peonidin 3-O-rutinoside | -8.576                 | MOE      | -7.853         | <b>Asn89, Tyr92, Asn96, His108, Asn109, Pro112, Ile113, Gln165, Ile182, His197, Val200, Ile204, Phe264, Phe267, Phe268, Tyr272, Ile283, Tyr287</b>                                       | 18                                      | 15                          |

|                             |        |          |        |                                                                                                                                                                     |    |    |
|-----------------------------|--------|----------|--------|---------------------------------------------------------------------------------------------------------------------------------------------------------------------|----|----|
|                             |        | AutoVina | -9.3   | <b>Asn89, Tyr92, Ala93, Asn96, His108, Asn109, Pro112, Ile113, Gln165, Cys180, Ile182, Glu193, His197, Ile204, Phe264, Phe268, Pro271, Tyr272, Tyr287</b>           | 19 |    |
| Isorhamnetin 3-O-rutinoside | -8.519 | MOE      | -8.239 | <b>Asn89, Tyr92, Asn96, His108, Asn109, Pro112, Ile113, Gln165, Phe167, Cys180, Met181, Ile182, His197, Val200, Thr201, Phe264, Phe268, Ile283, Gln284, Tyr287</b>  | 20 | 13 |
|                             |        | AutoVina | -8.8   | <b>Asn89, Tyr92, Ala93, His108, Asn109, Pro112, Ile113, Gln165, Met181, Ile182, Glu193, His197, Ile204, Phe264, Phe268, Pro271, Tyr272, Tyr287, Met291</b>          | 19 |    |
| Quercitrin                  | -8.455 | MOE      | -7.51  | <b>Asn85, Asn89, His108, Asn109, Pro112, Ile113, Gln165, Ile182, Glu193, His197, Val200, Thr201, Ile204, Phe264, His265, Phe268, Tyr272</b>                         | 17 | 15 |
|                             |        | AutoVina | -9.4   | <b>Asn85, Asn89, His108, Asn109, Pro112, Ile113, Gln165, Ile182, His197, Val200, Thr201, Phe264, His265, Phe268, Tyr272</b>                                         | 15 |    |
| Quercetin dihexoside        | -8.420 | MOE      | -7.841 | <b>Asn89, Tyr92, Ala93, Asn96, His108, Asn109, Pro112, Ile113, Gln165, Ile182, Glu193, His197, Trp261, Phe264, Phe267, Phe268, Ile283, Gln284, Tyr287, Met295</b>   | 20 | 15 |
|                             |        | AutoVina | -9     | <b>Asn89, Tyr92, Ala93, His108, Asn109, Pro112, Ile113, Gln165, Ile182, Glu193, Tyr196, His197, Phe264, Phe268, Pro271, Tyr272, Tyr287, Met291, Met295</b>          | 19 |    |
| Kaempferol-3-rutinoside     | -8.404 | MOE      | -7.708 | <b>Asn89, Tyr92, Asn109, Pro112, Ile113, Gln165, Met181, Ile182, Glu193, His197, Thr201, Trp261, Phe264, Phe268, Tyr272, Tyr287, Met291, Ala294, Met295</b>         | 19 | 15 |
|                             |        | AutoVina | -9.1   | <b>Asn89, Tyr92, His108, Asn109, Pro112, Ile113, Gln165, Cys180, Met181, Ile182, Glu193, His197, Val200, Ile204, Phe264, His265, Phe268, Tyr272, Tyr287, Met291</b> | 20 |    |
| Alpha-tocotrienol           | -8.402 | MOE      | -7.804 | <b>Tyr92, Ala93, Asn96, His108, Asn109, Pro112, Ile113, Gln165, Cys180, Ile182, His197, Val200, Ile204, Phe264, His265, Phe267, Phe268, Ile283, Gln284, Tyr287</b>  | 20 | 17 |
|                             |        | AutoVina | -9     | <b>Asn89, Tyr92, Ala93, Asn96, His108, Asn109, Pro112, Ile113, Gln165, Cys180, Met181, Ile182, His197, Val200, Ile204, Phe264, His265, Phe268, Tyr287</b>           | 19 |    |
| Isorhamnetin-3-O-glucoside  | -8.366 | MOE      | -7.333 | <b>Tyr92, His108, Asn109, Pro112, Ile113, Gln165, Ile182, Glu193, Tyr196, His197, Thr201, Ile204, Phe264, Phe268, Tyr272, Tyr287</b>                                | 16 | 13 |
|                             |        | AutoVina | -9.4   | <b>Asn89, Asn109, Pro112, Ile113, Gln165, Ile182, Trp184, Glu193, His197, Val200, Thr201, Ile204, Phe264, His265, Phe268, Tyr272, Tyr287, Met291</b>                | 18 |    |
| Quercetin-3-O-glucoside     | -8.176 | MOE      | -7.353 | <b>Asn89, Tyr92, His108, Asn109, Pro112, Ile113, Val116, Gln165, Ile182, Trp184, Glu193, His197, Val200, Ile204, Phe264, Phe268, Tyr272, Tyr287</b>                 | 18 | 14 |



|                                  |        |          |        |                                                                                                                                                                                                                                                                                   |    |    |
|----------------------------------|--------|----------|--------|-----------------------------------------------------------------------------------------------------------------------------------------------------------------------------------------------------------------------------------------------------------------------------------|----|----|
|                                  |        | AutoVina | -9     | Asn85, <b>Asn89</b> , <b>His108</b> , <b>Asn109</b> , <b>Pro112</b> , <b>Ile113</b> , <b>Gln165</b> , <b>Ile182</b> , <b>Trp184</b> , <b>Glu193</b> , Tyr196, <b>His197</b> , <b>Val200</b> , Thr201, <b>Ile204</b> , <b>Phe264</b> , His265, <b>Phe268</b>                       | 18 |    |
| Quercetin-3-glucoside            | -8.140 | MOE      | -7.580 | <b>Asn89</b> , <b>His108</b> , <b>Asn109</b> , <b>Pro112</b> , <b>Ile113</b> , <b>His165</b> , <b>Ile182</b> , <b>Glu193</b> , <b>His197</b> , <b>Val200</b> , <b>Thr201</b> , <b>Ile204</b> , <b>Phe264</b> , <b>Phe268</b> , Pro271, Tyr272                                     | 16 | 14 |
|                                  |        | AutoVina | -8.7   | Asn85, <b>Asn89</b> , <b>His108</b> , <b>Asn109</b> , <b>Pro112</b> , <b>Ile113</b> , <b>Gln165</b> , <b>Ile182</b> , Trp184, <b>Glu193</b> , Tyr196, <b>His197</b> , <b>Val200</b> , <b>Thr201</b> , <b>Ile204</b> , <b>Phe264</b> , His265, <b>Phe268</b>                       | 18 |    |
| Dicafeoylquinic acid             | -8.128 | MOE      | -7.557 | <b>Asn89</b> , <b>Tyr92</b> , Asn96, <b>His108</b> , <b>Asn109</b> , <b>Ile113</b> , <b>Gln165</b> , Cys180, Met181, <b>His197</b> , <b>Val200</b> , <b>Thr201</b> , <b>Ile204</b> , <b>His265</b> , <b>Phe264</b> , <b>Phe268</b> , <b>Tyr287</b>                                | 17 | 14 |
|                                  |        | AutoVina | -8.7   | Asn85, <b>Asn89</b> , <b>Tyr92</b> , <b>His108</b> , <b>Asn109</b> , Pro112, <b>Ile113</b> , <b>Gln165</b> , <b>Ile182</b> , <b>His197</b> , <b>Val200</b> , <b>Thr201</b> , <b>Ile204</b> , <b>Phe264</b> , <b>His265</b> , <b>Phe268</b> , Tyr272, <b>Tyr287</b>                | 18 |    |
| Neoxanthin                       | -7.964 | MOE      | -7.129 | Phe25, Gln27, <b>Tyr92</b> , Asn96, Asn109, Gln165, <b>Ile182</b> , Phe264, <b>Phe268</b> , Leu279, Lys281, Phe282, <b>Ile283</b> , <b>Gln284</b> , <b>Tyr287</b>                                                                                                                 | 15 | 5  |
|                                  |        | AutoVina | -8.8   | Asn89, <b>Tyr92</b> , Ala93, His108, Asn189, Lys190, Glu193, Lys194, Phe267, <b>Phe268</b> , Pro271, Tyr272, Tyr278, <b>Ile283</b> , <b>Gln284</b> , <b>Tyr287</b>                                                                                                                | 16 |    |
| 7 $\alpha$ -Hydroxy sitosterol   | -7.963 | MOE      | -6.627 | <b>Asn89</b> , <b>Tyr92</b> , <b>Ala93</b> , <b>Asn96</b> , <b>His108</b> , <b>Asn109</b> , <b>Pro112</b> , <b>Ile113</b> , <b>Gln165</b> , His197, <b>Val200</b> , <b>Ile204</b> , <b>Phe264</b> , <b>His265</b> , <b>Phe268</b> , <b>Tyr287</b> , <b>Met291</b>                 | 17 | 16 |
|                                  |        | AutoVina | -9.3   | <b>Asn89</b> , <b>Tyr92</b> , <b>Ala93</b> , <b>Asn96</b> , <b>His108</b> , <b>Asn109</b> , <b>Pro112</b> , <b>Ile113</b> , Val116, <b>Gln165</b> , <b>Val200</b> , <b>Ile204</b> , Trp261, <b>Phe264</b> , <b>His265</b> , <b>Phe268</b> , Gln284, <b>Tyr287</b> , <b>Met291</b> | 19 |    |
| Hecogenin                        | -7.953 | MOE      | -6.307 | <b>Asn89</b> , <b>Tyr92</b> , Ala93, <b>Asn96</b> , His108, <b>Asn109</b> , Pro112, <b>Gln165</b> , Arg177, Val179, <b>Cys180</b> , Met181, <b>Phe264</b> , <b>Phe268</b> , <b>Tyr287</b>                                                                                         | 15 | 9  |
|                                  |        | AutoVina | -9.6   | <b>Asn89</b> , <b>Tyr92</b> , <b>Asn96</b> , <b>Asn109</b> , <b>Ile113</b> , <b>Gln165</b> , <b>Cys180</b> , <b>Ile182</b> , His197, <b>Val200</b> , <b>Thr201</b> , <b>Ile204</b> , <b>Phe264</b> , His265, <b>Phe268</b> , <b>Tyr287</b>                                        | 16 |    |
| Sitosterol- $\beta$ -D-glucoside | -7.953 | MOE      | -7.106 | <b>Asn89</b> , <b>Tyr92</b> , <b>Ala93</b> , <b>His108</b> , <b>Asn109</b> , <b>Gln165</b> , <b>Cys180</b> , Met181, <b>Ile182</b> , <b>Glu193</b> , <b>His197</b> , <b>Phe268</b> , Pro271, Tyr272, <b>Tyr287</b> , Met291                                                       | 16 | 12 |
|                                  |        | AutoVina | -8.8   | <b>Asn89</b> , <b>Tyr92</b> , <b>Ala93</b> , Asn96, <b>His108</b> , <b>Asn109</b> , <b>Ile113</b> , <b>Gln165</b> , <b>Cys180</b> , <b>Ile182</b> , <b>Glu193</b> , <b>His197</b> , Phe267, <b>Phe268</b> , Tyr278, <b>Ile283</b> , <b>Tyr287</b>                                 | 17 |    |

The residues in bold are the residues that form interactions with the molecule in both software.

**Table S8.** The affinity values and residues of CLR1 that interacted with Zafirlukast and the best 15 molecules, with both software.

| Phytochemical       | Mean Value of Affinity | Software | Affinity Value | Residues                                                                                                                                                                                                                                                                                                                                       | Number of residues forming interactions | Number of repeated residues |
|---------------------|------------------------|----------|----------------|------------------------------------------------------------------------------------------------------------------------------------------------------------------------------------------------------------------------------------------------------------------------------------------------------------------------------------------------|-----------------------------------------|-----------------------------|
| Zafirlukast         | -11.292                | MOE      | -9.285         | Thr100, <b>Tyr104</b> , <b>Tyr108</b> , <b>Phe112</b> , <b>Thr154</b> , <b>Ser155</b> , <b>Pro157</b> , <b>Phe158</b> , Ala161, Gln164, Phe174, Glu175, <b>Pro176</b> , <b>Pro177</b> , <b>Val186</b> , <b>Leu189</b> , <b>His190</b> , <b>Ser193</b> , <b>Val196</b> , <b>Gly197</b> , <b>Tyr249</b> , <b>Arg253</b> , <b>Leu257</b>          | 23                                      | 18                          |
|                     |                        | AutoVina | -13.3          | <b>Tyr104</b> , <b>Tyr108</b> , <b>Phe112</b> , Phe150, <b>Thr154</b> , <b>Ser155</b> , <b>Pro157</b> , <b>Phe158</b> , <b>Pro176</b> , <b>Pro177</b> , <b>Val186</b> , <b>Leu189</b> , <b>His190</b> , <b>Ser193</b> , <b>Val196</b> , <b>Gly197</b> , <b>Tyr249</b> , Gln252, <b>Arg253</b> , His256, <b>Leu257</b> , Val277, Thr280, Leu281 | 24                                      |                             |
| Amentoflavone       | -9.565                 | MOE      | -7.730         | Thr100, <b>Tyr104</b> , <b>Phe158</b> , Ala161, <b>Gln164</b> , <b>Phe174</b> , <b>Glu175</b> , <b>Pro176</b> , <b>Pro177</b> , Val186, <b>Leu189</b> , His190, <b>Ser193</b> , <b>Arg253</b> , His256, <b>Leu257</b> , <b>Val277</b>                                                                                                          | 17                                      | 12                          |
|                     |                        | AutoVina | -11.4          | <b>Tyr104</b> , Tyr108, Thr154, <b>Phe158</b> , <b>Gln164</b> , <b>Phe174</b> , <b>Glu175</b> , <b>Pro176</b> , <b>Pro177</b> , <b>Leu189</b> , <b>Ser193</b> , Tyr249, Gln252, <b>Arg253</b> , <b>Leu257</b> , <b>Val277</b> , Thr280, Leu281                                                                                                 | 18                                      |                             |
| Lutein              | -9.161                 | MOE      | -8.822         | Tyr104, Tyr108, <b>Phe150</b> , <b>Thr154</b> , Ser155, <b>Phe158</b> , Phe174, <b>Glu175</b> , <b>Pro176</b> , <b>Pro177</b> , <b>Val186</b> , <b>Leu189</b> , His190, <b>Val192</b> , <b>Ser193</b> , <b>Val196</b> , Tyr249, Arg253, Leu257, Val277, Leu281                                                                                 | 21                                      | 11                          |
|                     |                        | AutoVina | -9.5           | <b>Phe150</b> , <b>Thr154</b> , Pro157, <b>Phe158</b> , Gln164, Asp166, Lys165, Lys172, <b>Glu175</b> , <b>Pro176</b> , <b>Pro177</b> , Gln181, <b>Val186</b> , <b>Leu189</b> , <b>Val192</b> , <b>Ser193</b> , <b>Val196</b>                                                                                                                  | 17                                      |                             |
| Alpha-tocotrienol   | -9.108                 | MOE      | -8.816         | Thr100, <b>Tyr104</b> , <b>Tyr108</b> , Phe112, <b>Phe150</b> , Val151, <b>Thr154</b> , <b>Ser155</b> , <b>Phe158</b> , Phe174, Glu175, Pro176, Pro177, <b>Val186</b> , <b>Ser193</b> , Val196, Gly197, <b>Tyr249</b> , <b>Arg253</b> , <b>Val277</b> , Leu281                                                                                 | 21                                      | 11                          |
|                     |                        | AutoVina | -9.4           | <b>Tyr104</b> , <b>Tyr108</b> , <b>Phe150</b> , <b>Thr154</b> , <b>Ser155</b> , <b>Phe158</b> , <b>Val186</b> , Leu189, His190, Val192, <b>Ser193</b> , <b>Tyr249</b> , Gln252, <b>Arg253</b> , His256, Leu257, <b>Val277</b>                                                                                                                  | 17                                      |                             |
| Violaxanthin        | -8.945                 | MOE      | -8.391         | <b>Tyr108</b> , <b>Phe150</b> , <b>Thr154</b> , <b>Ser155</b> , <b>Pro157</b> , <b>Phe158</b> , Ala161, <b>Gln164</b> , Lys165, Asp166, Lys172, <b>Glu175</b> , <b>Pro176</b> , Gln178, Gln181, <b>Val186</b> , <b>Leu189</b> , <b>Val192</b> , <b>Ser193</b> , <b>Val196</b> , <b>Leu257</b>                                                  | 21                                      | 20                          |
|                     |                        | AutoVina | -9.5           | <b>Tyr108</b> , <b>Phe150</b> , <b>Thr154</b> , <b>Ser155</b> , <b>Pro157</b> , <b>Phe158</b> , Gln164, Lys165, Asp166, Lys172, <b>Glu175</b> , <b>Pro176</b> , Pro177, Gln178, Gln181, <b>Val186</b> , <b>Leu189</b> , <b>Val192</b> , <b>Ser193</b> , <b>Val196</b> , Gly197, <b>Leu257</b>                                                  | 22                                      |                             |
| Epicatechin gallate | -8.938                 | MOE      | -7.677         | <b>Thr100</b> , <b>Tyr104</b> , Tyr108, <b>Phe158</b> , <b>Gln164</b> , <b>Phe174</b> , <b>Glu175</b> , <b>Pro176</b> , <b>Pro177</b> , <b>Val186</b> , Leu189, <b>His190</b>                                                                                                                                                                  | 20                                      | 17                          |

|                                  |        |          |        |                                                                                                                                                                               |    |    |
|----------------------------------|--------|----------|--------|-------------------------------------------------------------------------------------------------------------------------------------------------------------------------------|----|----|
|                                  |        |          |        | <b>Ser193, Tyr249, Arg253, His256, Leu257, Val277, Thr280, Leu281</b>                                                                                                         |    |    |
|                                  |        | AutoVina | -10.2  | Arg79, <b>Thr100, Tyr104, Phe158, Gln164, Phe174, Glu175, Pro176, Pro177, Val186, His190, Ser193, Tyr249, Gln252, Arg253, Leu257, Val277, Thr280, Leu281</b>                  | 19 |    |
| Epigallocatechin gallate         | -8.923 | MOE      | -7.846 | <b>Tyr104, Tyr108, Phe158, Gln164, Phe174, Glu175, Pro176, Pro177, Val186, His190, Ser193, Tyr249, Gln252, Arg253, His256, Leu257, Val277, Thr280, Leu281</b>                 | 19 | 18 |
|                                  |        | AutoVina | -10    | Arg79, <b>Thr100, Tyr104, Phe158, Gln164, Phe174, Glu175, Pro176, Pro177, Val186, His190, Ser193, Tyr249, Gln252, Arg253, His256, Leu257, Val277, Thr280, Leu281</b>          | 20 |    |
| $\beta$ -carotene                | -8.874 | MOE      | -8.249 | <b>Thr154, Ser155, Pro157, Phe158, Gln164, Lys165, Asp166, Lys172, Glu175, Pro176, Pro177, Gln178, Gln181, Val186, Leu189, Val192, Ser193, Val196, Arg253</b>                 | 19 | 16 |
|                                  |        | AutoVina | -9.5   | Tyr108, <b>Thr154, Phe158, Gln164, Lys165, Asp166, Lys172, Glu175, Pro176, Pro177, Gln178, Gln181, Val186, Leu189, His190, Val192, Ser193, Val196, Leu257</b>                 | 19 |    |
| Neoxanthin                       | -8.872 | MOE      | -7.845 | <b>Tyr104, Phe150, Thr154, Pro157, Phe158, Pro177, Val186, Leu189, His190, Val192, Ser193, Val196, Ile200, Tyr249, Arg253, His256, Leu257</b>                                 | 17 | 15 |
|                                  |        | AutoVina | -9.9   | <b>Tyr104, Phe150, Thr154, Pro157, Phe158, Pro176, Pro177, Val186, Leu189, His190, Val192, Ser193, Val196, Gln252, Arg253, His256, Leu257, Val277, Thr280, Leu281</b>         | 20 |    |
| Sitosterol- $\beta$ -D-glucoside | -8.746 | MOE      | -7.992 | <b>Thr100, Tyr104, Thr154, Pro157, Phe158, Ala161, Gln164, Glu175, Pro176, Pro177, Val186, Leu189, His190, Ser193, Arg253, Leu257, Val277, Leu281</b>                         | 18 | 13 |
|                                  |        | AutoVina | -9.5   | <b>Thr100, Tyr104, Tyr108, Phe112, Phe150, Val151, Thr154, Ser155, Pro157, Phe158, Ala161, Gln164, Phe174, Glu175, Val186, Leu189, His190, Ser193, Val196, Gly197, Arg253</b> | 21 |    |
| Peonidin 3-O-rutinoside          | -8.479 | MOE      | -7.658 | <b>Thr100, Tyr104, Pro157, Phe158, Met160, Ala161, Gln164, Phe174, Glu175, Pro176, Val186, Leu189, His190, Tyr249, Arg253, Leu257, Val277, Leu281</b>                         | 18 | 16 |
|                                  |        | AutoVina | -9.3   | Arg79, <b>Thr100, Tyr104, Phe158, Ala161, Gln164, Phe174, Glu175, Pro176, Pro177, Val186, Leu189, His190, Ser193, Tyr249, Arg253, His256, Leu257, Val277, Leu281</b>          | 20 |    |
| Kaempferol-3-rutinoside          | -8.418 | MOE      | -7.536 | <b>Thr100, Tyr104, Thr154, Pro157, Phe158, Ala161, Lys162, Phe174, Glu175, Pro176, Pro177, Val186, Leu189, His190, Ser193, Tyr249, Arg253, Leu257, Val277, Leu281</b>         | 20 | 14 |
|                                  |        | AutoVina | -9.3   | <b>Thr100, Tyr104, Tyr108, Thr154, Ser155, Pro157, Phe158, Ala161, Gln164, Glu175, Val186, Leu189, His190, Ser193, Tyr249, Arg253, Leu257</b>                                 | 17 |    |

|                             |        |          |        |                                                                                                                                                               |    |    |
|-----------------------------|--------|----------|--------|---------------------------------------------------------------------------------------------------------------------------------------------------------------|----|----|
| Isorhamnetin 3-O-rutinoside | -8.373 | MOE      | -7.847 | <b>Thr100, Tyr104, Pro157, Phe158, Ala161, Gln164, Pro176, Pro177, Val186, Leu189, His190, Tyr249, Arg253, Val277, Leu281</b>                                 | 18 | 14 |
|                             |        | AutoVina | -8.9   | <b>Thr100, Tyr104, Ser155, Pro157, Phe158, Ala161, Gln164, Glu175, Pro176, Pro177, Val186, Leu189, His190, Tyr249, Arg253, Leu257</b>                         | 19 |    |
| 9-amino-camptothecin        | -8.291 | MOE      | -6.582 | <b>Tyr104, Tyr108, Thr154, Ser155, Pro157, Phe158, Pro177, Val186, Leu189, Ser193, Tyr249, Arg253, Leu257</b>                                                 | 13 | 12 |
|                             |        | AutoVina | -10    | <b>Tyr104, Tyr108, Thr154, Ser155, Pro157, Phe158, Val186, Leu189, Val192, Ser193, Tyr249, Arg253, Leu257</b>                                                 | 13 |    |
| Quercetin rhamnoside        | -8.282 | MOE      | -7.364 | <b>Tyr104, Tyr108, Phe112, Phe150, Val151, Thr154, Ser155, Phe158, Val186, Leu189, His190, Val192, Ser193, Val196, Gly197, Tyr249, Arg253, Leu257</b>         | 19 | 16 |
|                             |        | AutoVina | -9.2   | <b>Tyr104, Tyr108, Phe112, Phe150, Val151, Thr154, Ser155, Phe158, Leu189, His190, Val192, Ser193, Val196, Gly197, Tyr249, Arg253</b>                         | 16 |    |
| Apigenin-7-O-glucoside      | -8.263 | MOE      | -7.326 | <b>Tyr104, Tyr108, Thr154, Ser155, Phe158, Phe174, Glu175, Pro176, Pro177, Val186, Leu189, His190, Ser193, Tyr249, Arg253, Leu257, Val277, Leu281</b>         | 18 | 18 |
|                             |        | AutoVina | -9.2   | <b>Tyr104, Tyr108, Val151, Thr154, Ser155, Phe158, Phe174, Glu175, Pro176, Pro177, Val186, Leu189, His190, Ser193, Tyr249, Arg253, Leu257, Val277, Leu281</b> | 19 |    |

The residues in bold are the residues that form interactions with the molecule in both software.

**Table S9.** The affinity values and residues of CRTH2 that interacted with Fevipiprant and the best 15 molecules, with both software.

| Phytochemical     | Mean Value of Affinity | Software | Affinity Value | Residues                                                                                                                                                                | Number of residues forming interactions | Number of repeated residues |
|-------------------|------------------------|----------|----------------|-------------------------------------------------------------------------------------------------------------------------------------------------------------------------|-----------------------------------------|-----------------------------|
| Neoxanthin        | -9.529                 | MOE      | -9.158         | <b>Leu20, Gln21, Ser22, Phe87, Phe90, His95, His107, Ser108, Phe111, Phe112, Arg170, Arg175, Met181, Cys182, Tyr183, Tyr184, Tyr262, Trp283, Arg284, Pro287, Thr290</b> | 21                                      | 17                          |
|                   |                        | AutoVina | -9.9           | <b>Leu20, Gln21, Ser22, Tyr30, Phe87, Phe90, His95, His107, Ser108, Phe111, Phe112, Arg170, Arg175, Arg179, Tyr183, Trp283, Arg284, Leu286, Pro287, Thr290, Phe294</b>  | 21                                      |                             |
| Alpha-tocotrienol | -9.258                 | MOE      | -8.817         | <b>Met17, Leu20, Ser22, Tyr30, Phe87, Phe90, His95, Trp97, His107,</b>                                                                                                  | 21                                      | 13                          |

|                      |        |          |        |                                                                                                                                                                        |    |    |
|----------------------|--------|----------|--------|------------------------------------------------------------------------------------------------------------------------------------------------------------------------|----|----|
|                      |        |          |        | <b>Ser108, Phe111, Phe112, Arg170, Arg175, Arg179, Met181, Cys182, Tyr183, Trp283, Pro287, Thr290</b>                                                                  |    |    |
|                      |        | AutoVina | -9.7   | <b>Met17, Phe87, Phe90, His107, Ser108, Phe111, Phe112, Arg170, Arg175, Cys182, Tyr183, Tyr184, Thr190, Tyr262, Val282, Trp283, Pro287, Leu286, Phe294</b>             | 19 |    |
| Fevipiprant          | -9.207 | MOE      | -7.614 | <b>Met17, Phe87, Phe90, His107, Ser108, Phe111, Phe112, Arg170, Arg175, Met181, Cys182, Tyr183, Tyr184, Lys210, Tyr262, Pro287, Thr290</b>                             | 17 | 17 |
|                      |        | AutoVina | -10.8  | <b>Met17, Phe87, Phe90, His107, Ser108, Phe111, Phe112, Arg170, Arg175, Met181, Cys182, Tyr183, Tyr184, Lys210, Tyr262, Leu286, Pro287, Thr290</b>                     | 18 |    |
| Ursolic acid         | -8.958 | MOE      | -5.617 | <b>Met17, Leu20, Phe87, Phe90, His95, His107, Ser108, Phe111, Phe112, Arg170, Arg175, Cys182, Tyr183, Trp283, Leu286, Pro287, Thr290, Phe294</b>                       | 18 | 15 |
|                      |        | AutoVina | -12.3  | <b>Phe87, Phe90, His95, His107, Ser108, Phe111, Phe112, Arg170, Arg175, Cys182, Tyr183, Tyr262, Trp283, Pro287, Thr290, Phe294</b>                                     | 16 |    |
| Integerrimine        | -8.909 | MOE      | -6.819 | <b>Phe87, Phe90, His107, Ser108, Phe111, Arg170, Cys182, Tyr183, Tyr184, Tyr262, Leu286, Pro287, Thr290, Phe294</b>                                                    | 14 | 14 |
|                      |        | AutoVina | -11    | <b>Phe87, Phe90, His107, Ser108, Phe111, Phe112, Arg170, Cys182, Tyr183, Tyr184, Tyr262, Leu286, Pro287, Thr290, Phe294</b>                                            | 15 |    |
| Amentoflavone        | -8.880 | MOE      | -7.960 | <b>Met17, Leu20, His39, Phe87, Phe90, Leu91, His95, Phe111, Phe112, Arg170, Arg175, Met181, Cys182, Tyr183, Lys210, Tyr262, Trp283, Leu286, Pro287, Thr290, Ser291</b> | 21 | 15 |
|                      |        | AutoVina | -9.8   | <b>Met17, Leu20, His39, Phe87, Phe90, Leu91, His95, Trp97, His107, Arg175, Met181, Cys182, Tyr183, Val282, Trp283, Leu286, Pro287, Ser291</b>                          | 18 |    |
| $\beta$ -carotene    | -8.868 | MOE      | -9.036 | <b>Gln21, Ser22, His23, Phe87, His95, His107, Ser108, Phe111, Phe112, Arg170, Arg175, Arg179, Tyr183, Trp283, Pro287, Thr290, Phe294</b>                               | 17 | 15 |
|                      |        | AutoVina | -8.7   | <b>Met17, Leu20, Gln21, Ser22, His23, Phe87, Phe90, His107, Ser108, Phe111, Phe112, Arg170, Arg175, Cys182, Tyr183, Trp283, Arg284, Pro287, Thr290, Phe294</b>         | 20 |    |
| 9-amino-camptothecin | -8.853 | MOE      | -7.407 | <b>Met17, Phe90, His107, Ser108, Phe111, Phe112, Arg170, Arg175, Met181, Cys182, Tyr183, Tyr262, Leu286, Pro287, Thr290, Phe294</b>                                    | 16 | 11 |
|                      |        | AutoVina | -10.3  | <b>Met17, Phe87, Phe90, Trp97, His107, Ser108, Arg170, Arg175, Cys182, Tyr183, Val282, Trp283, Leu286, Pro287, Thr290</b>                                              | 15 |    |
| Hecogenin            | -8.852 | MOE      | -7.105 | <b>Met17, Leu20, Phe87, Phe90, His107, Ser108, Phe111, Arg170, Arg175, Cys182, Tyr183, Trp283, Leu286, Pro287, Thr290, Phe294</b>                                      | 16 | 16 |
|                      |        | AutoVina | -10.6  | <b>Met17, Leu20, Phe87, Phe90, His95, His107, Ser108, Phe111, Arg170,</b>                                                                                              | 17 |    |

|                             |        |          |        |                                                                                                                                                                         |    |    |
|-----------------------------|--------|----------|--------|-------------------------------------------------------------------------------------------------------------------------------------------------------------------------|----|----|
|                             |        |          |        | <b>Arg175, Cys182, Tyr183, Trp283, Leu286, Pro287, Thr290, Phe294</b>                                                                                                   |    |    |
| Kaempferol rhamnoside       | -8.777 | MOE      | -7.855 | Met17, <b>Phe87, Phe90, Trp97, His107, Ser108, Phe111, Phe112, Arg170, Arg175, Met181, Cys182, Tyr183, Tyr262, Trp283, Leu286, Pro287, Thr290, Phe294</b>               | 19 | 14 |
|                             |        | AutoVina | -9.7   | <b>Phe87, Phe90, His95, Trp97, His107, Phe112, Arg170, Arg175, Cys182, Tyr183, Tyr184, Tyr262, Val282, Trp283, Leu286, Pro287, Thr290</b>                               | 17 |    |
| Cholecalciferol             | -8.705 | MOE      | -7.71  | Leu20, <b>Phe87, Phe90, His95, His107, Ser108, Phe111, Phe112, Arg170, Arg175, Arg179, Met181, Cys182, Tyr183, Trp283, Arg284, Leu286, Pro287, Thr290, Phe294</b>       | 20 | 15 |
|                             |        | AutoVina | -9.7   | Met17, <b>Phe87, Phe90, Trp97, His107, Ser108, Phe111, Arg170, Arg175, Met181, Cys182, Tyr183, Tyr262, Trp283, Leu286, Pro287, Thr290, Phe294</b>                       | 18 |    |
| Solanidine                  | -8.703 | MOE      | -5.707 | Met17, <b>Phe87, Phe90, His95, His105, Ser108, Phe111, Arg170, Arg175, Cys182, Tyr183, Val282, Trp283, Leu286, Pro287, Thr290, Phe294</b>                               | 17 | 14 |
|                             |        | AutoVina | -11.7  | <b>Phe87, Phe90, His95, His107, Ser108, Phe111, Phe112, Arg170, Arg175, Cys182, Tyr183, Tyr262, Trp283, Leu286, Pro287, Thr290, Phe294</b>                              | 17 |    |
| Isorhamnetin 3-O-rutinoside | -8.698 | MOE      | -8.497 | <b>Leu20, Ser22, Phe87, Phe90, Leu91, His95, Ser108, Phe112, Arg170, Arg175, Arg179, Met181, Cys182, Tyr183, Tyr184, Tyr262, Trp283, Arg284, Leu286, Pro287, Thr290</b> | 21 | 15 |
|                             |        | AutoVina | -8.9   | Met17, <b>Leu20, His39, Phe87, Phe90, Leu91, His95, Trp97, Ser108, Arg170, Arg175, Met181, Cys182, Tyr183, Trp283, Arg284, Pro287, Phe288, Thr290, Ser291</b>           | 20 |    |
| Isorhamnetin rutinoside     | -8.620 | MOE      | -7.641 | Met17, <b>Phe87, Phe90, Leu91, His95, His107, Ser108, Phe111, Phe112, Arg170, Arg175, Met181, Cys182, Tyr183, Trp283, Pro287, Thr290, Ser291, Phe294</b>                | 19 | 15 |
|                             |        | AutoVina | -9.6   | Leu20, His39, <b>Phe87, Phe90, Leu91, His95, His107, Ser108, Arg170, Arg175, Arg179, Cys182, Tyr183, Trp283, Pro287, Thr290, Ser291, Phe294</b>                         | 18 |    |
| Isorhamnetin-3-O-glucoside  | -8.611 | MOE      | -8.423 | <b>Met17, Phe87, Phe90, His95, Trp97, His107, Ser108, Phe111, Phe112, Arg170, Arg175, Cys182, Tyr183, Tyr184, Tyr262, Trp283, Leu286, Pro287, Thr290, Phe294</b>        | 20 | 20 |
|                             |        | AutoVina | -8.8   | <b>Met17, Phe87, Phe90, His95, Trp97, His107, Ser108, Phe111, Phe112, Arg170, Arg175, Cys182, Tyr183, Tyr184, Tyr262, Trp283, Leu286, Pro287, Thr290, Phe294</b>        | 20 |    |
| Epicatechin gallate         | -8.610 | MOE      | -7.621 | Met17, <b>Phe87, Phe90, His95, His107, Ser108, Phe111, Phe112, Arg170, Arg175, Met181, Cys182, Tyr183, Tyr184, Tyr262, Leu286, Pro287, Thr290, Phe294</b>               | 19 | 16 |

|  |  |          |      |                                                                                                                                                                     |    |  |
|--|--|----------|------|---------------------------------------------------------------------------------------------------------------------------------------------------------------------|----|--|
|  |  | AutoVina | -9.6 | <b>Phe87, Phe90, His107, Ser108, Phe111, Phe112, Arg170, Arg175, Met181, Cys182, Tyr183, Tyr184, Lys210, Tyr262, Ser266, Glu269, Leu285, Pro287, Thr290, Phe294</b> | 20 |  |
|--|--|----------|------|---------------------------------------------------------------------------------------------------------------------------------------------------------------------|----|--|

The residues in bold are the residues that form interactions with the molecule in both software.

**Table S10.** The affinity values and residues of BK2R that interacted with JSM10292 and the best 15 molecules, with both software.

| Phytochemical                  | Mean Value of Affinity | Software | Affinity Value | Residues                                                                                                                                                              | Number of residues forming interactions | Number of repeated residues |
|--------------------------------|------------------------|----------|----------------|-----------------------------------------------------------------------------------------------------------------------------------------------------------------------|-----------------------------------------|-----------------------------|
| Isorhamnetin rutinoside        | -8.718                 | MOE      | -7.937         | <b>Trp113, Phe121, Asn134, Ile137, Ser138, Leu141, Met192, Arg196, Val212, Ile213, Glu221, Thr224, Asn225, Leu228, Phe286, Thr290, Asp293, Arg297, Ser318, Tyr322</b> | 20                                      | 10                          |
|                                |                        | AutoVina | -9.5           | <b>Leu53, Trp113, Ile117, Phe121, Asn134, Ile137, Leu141, Arg196, Tyr201, Glu204, Ala210, Cys211, Val212, Ile213, Asp311, Thr314, Gln315, Ser318, Phe319, Tyr322</b>  | 20                                      |                             |
| Heptadecanoic acid             | -8.647                 | MOE      | -6.395         | <b>Leu53, Trp113, Phe121, Ile137, Leu141, Tyr201, Glu204, Trp283, Phe286, Asp311, Thr314, Gln315, Ser318, Phe319, Ala321, Tyr322</b>                                  | 16                                      | 7                           |
|                                |                        | AutoVina | -10.9          | <b>Leu53, Trp113, Phe121, Arg196, Tyr201, Glu204, Ala210, Cys211, Val212, Asp311, Thr314, Gln315</b>                                                                  | 12                                      |                             |
| 7 $\beta$ -Hydroxy-sitosterol  | -8.645                 | MOE      | -7.49          | <b>Leu53, Trp113, Phe121, Asn134, Ile137, Ser138, Met192, Arg196, Tyr201, Glu204, Phe286, Asp311, Thr314, Gln315, Ser318, Phe319, Tyr322</b>                          | 17                                      | 12                          |
|                                |                        | AutoVina | -9.8           | <b>Trp113, Phe121, Ile137, Tyr201, Glu204, Ala210, Val212, Phe286, Asp311, Thr314, Gln315, Ser318, Phe319, Tyr322</b>                                                 | 14                                      |                             |
| $\gamma$ -sitosterol           | -8.603                 | MOE      | -7.507         | <b>Leu106, Ile137, Leu141, Met192, Arg196, Ile213, Tyr215, Glu221, Thr224, Asn225, Phe286, Asp293, Arg297, Ser318, Ala321, Tyr322</b>                                 | 16                                      | 6                           |
|                                |                        | AutoVina | -9.7           | <b>Trp113, Phe121, Ile137, Leu141, Arg196, Tyr201, Glu204, Ala210, Val212, Phe286, Ser318, Phe319, Tyr322</b>                                                         | 13                                      |                             |
| 7 $\alpha$ -Hydroxy sitosterol | -8.569                 | MOE      | -7.038         | <b>Trp113, Phe121, Ile137, Ser138, Leu141, Met192, Leu228, Phe286, Asp293, Arg297, Asp311, Thr314, Gln315, Ser318, Phe319, Tyr322</b>                                 | 16                                      | 10                          |
|                                |                        | AutoVina | -10.1          | <b>Trp113, Phe121, Ile137, Tyr201, Glu204, Ala210, Val212, Phe286, Asp311, Thr314, Gln315, Ser318, Phe319, Tyr322</b>                                                 | 14                                      |                             |
| Amentoflavone                  | -8.384                 | MOE      | -7.769         | <b>Leu53, Trp113, Phe121, Asn134, Ile137, Met192, Arg196, Tyr201,</b>                                                                                                 | 20                                      | 15                          |

|                             |         |          |        |                                                                                                                                                                                                                                                                                                               |    |    |
|-----------------------------|---------|----------|--------|---------------------------------------------------------------------------------------------------------------------------------------------------------------------------------------------------------------------------------------------------------------------------------------------------------------|----|----|
|                             |         |          |        | Glu204, Val212, Asn225, <b>Leu228</b> , <b>Phe286</b> , <b>Thr290</b> , <b>Asp293</b> , <b>Thr314</b> , <b>Gln315</b> , <b>Ser318</b> , <b>Phe319</b> , <b>Tyr322</b>                                                                                                                                         |    |    |
|                             |         | AutoVina | -9     | <b>Trp113</b> , <b>Phe121</b> , <b>Asn134</b> , <b>Ile137</b> , Ser138, <b>Met192</b> , <b>Arg196</b> , <b>Leu228</b> , <b>Phe286</b> , Ser289, <b>Thr290</b> , <b>Asp293</b> , Asp311, <b>Thr314</b> , <b>Gln315</b> , <b>Ser318</b> , <b>Phe319</b> , <b>Tyr322</b>                                         | 18 |    |
| JSM-10292                   | -8.375  | MOE      | -7.450 | <b>Trp113</b> , <b>Phe121</b> , <b>Asn134</b> , Ser138, Leu141, <b>Met192</b> , <b>Arg196</b> , Tyr201, Ala210, Cys211, Val212, <b>Thr224</b> , <b>Asn225</b> , <b>Leu228</b> , <b>Asp293</b> , Asp311, Thr314, Gln315, Ser318                                                                                | 19 | 9  |
|                             |         | AutoVina | -9.3   | <b>Trp113</b> , <b>Phe121</b> , <b>Asn134</b> , <b>Met192</b> , <b>Arg196</b> , Ile213, Tyr215, Glu221, <b>Thr224</b> , <b>Asn225</b> , <b>Leu228</b> , Phe286, Thr290, <b>Asp293</b> , Arg297, Ser318, Phe319, Tyr322                                                                                        | 18 |    |
| Kaempferol-3-rutinoside     | -8.278  | MOE      | -8.657 | Leu53, Phe121, <b>Arg196</b> , Tyr201, Glu204, Val212, Ile213, Tyr215, Glu221, <b>Thr224</b> , <b>Asn225</b> , <b>Asp293</b> , Arg297, Asp311, <b>Thr314</b> , Gln315                                                                                                                                         | 16 | 5  |
|                             |         | AutoVina | -7.9   | Trp113, Asn134, Ile137, Ser138, Leu141, Met192, <b>Arg196</b> , <b>Thr224</b> , <b>Asn225</b> , Leu228, Trp283, Phe286, Thr290, <b>Asp293</b> , <b>Thr314</b> , Ser318, Ala321, Tyr322                                                                                                                        | 18 |    |
| Bioallethrin                | -8.197  | MOE      | -6.494 | <b>Trp113</b> , <b>Ile117</b> , <b>Phe121</b> , Asn134, Ile137, Leu141, Ser138, Met192, Arg196, Phe286, <b>Thr314</b> , <b>Gln315</b> , <b>Ser318</b> , <b>Phe319</b> , Ala321, <b>Tyr322</b>                                                                                                                 | 16 | 8  |
|                             |         | AutoVina | -9.9   | <b>Trp113</b> , <b>Ile117</b> , <b>Phe121</b> , Tyr201, Ala210, Cys211, Val212, <b>Thr314</b> , <b>Gln315</b> , <b>Ser318</b> , <b>Phe319</b> , <b>Tyr322</b>                                                                                                                                                 | 12 |    |
| Isorhamnetin 3-O-rutinoside | -8.181  | MOE      | -8.863 | <b>Trp113</b> , <b>Ile117</b> , <b>Phe121</b> , Asn134, Ile137, Leu141, Met192, <b>Arg196</b> , <b>Val212</b> , Ile213, Tyr215, Glu221, <b>Asn225</b> , <b>Leu228</b> , Trp283, <b>Phe286</b> , <b>Thr290</b> , <b>Asp293</b> , Arg297, <b>Gln315</b> , <b>Ser318</b> , <b>Phe319</b> , Ala321, <b>Tyr322</b> | 24 | 15 |
|                             |         | AutoVina | -7.5   | <b>Trp113</b> , <b>Ile117</b> , <b>Phe121</b> , <b>Arg196</b> , Ala210, Cys211, <b>Val212</b> , <b>Asn225</b> , <b>Leu228</b> , <b>Phe286</b> , <b>Thr290</b> , <b>Asp293</b> , Arg297, Asp311, Thr314, <b>Gln315</b> , <b>Ser318</b> , <b>Phe319</b> , <b>Tyr322</b>                                         | 19 |    |
| Quercetin rhamnoside        | -7.883  | MOE      | -6.666 | <b>Trp113</b> , <b>Phe121</b> , Asn134, Ile137, Met192, Arg196, Ile213, Thr224, <b>Asn225</b> , <b>Leu228</b> , <b>Thr290</b> , <b>Asp293</b> , <b>Thr314</b> , Gln315, <b>Ser318</b> , <b>Phe319</b> , <b>Tyr322</b>                                                                                         | 17 | 10 |
|                             |         | AutoVina | -9.1   | <b>Trp113</b> , Ile117, <b>Phe121</b> , <b>Asn225</b> , <b>Leu228</b> , Phe286, Ser289, <b>Thr290</b> , <b>Asp293</b> , Arg297, Asp311, <b>Thr314</b> , <b>Ser318</b> , <b>Phe319</b> , <b>Tyr322</b>                                                                                                         | 15 |    |
| Solanidine                  | -7.7819 | MOE      | -6.263 | <b>Trp113</b> , <b>Asn134</b> , Leu141, <b>Arg196</b> , Ile213, Tyr215, Glu221, Asn225, Leu228, Trp283, Phe286, Asp293, Arg297, <b>Ser318</b> , Ala321, <b>Tyr322</b>                                                                                                                                         | 16 | 5  |
|                             |         | AutoVina | -9.3   | <b>Trp113</b> , Phe121, <b>Asn134</b> , Ile137, Ser138, Met192, <b>Arg196</b> , Tyr201, Asp311, Thr314, Gln315, <b>Ser318</b> , Phe319, <b>Tyr322</b>                                                                                                                                                         | 14 |    |
| Piperine                    | -7.773  | MOE      | -5.646 | <b>Ile137</b> , Ser138, Leu141, Met192, <b>Arg196</b> , Ile213, Tyr215, Glu221, Thr224, Asn225, Leu228, Phe286, Asp293, Arg297, <b>Ser318</b> , Ala321, <b>Tyr322</b>                                                                                                                                         | 17 | 4  |



|                            |        |          |        |                                                                                                                                                                                                                                                                                      |    |    |
|----------------------------|--------|----------|--------|--------------------------------------------------------------------------------------------------------------------------------------------------------------------------------------------------------------------------------------------------------------------------------------|----|----|
|                            |        | AutoVina | -9.9   | Trp113, Phe121, Asn134, <b>Ile137</b> , <b>Arg196</b> , Tyr201, Glu204, Asp311, Gln315, <b>Ser318</b> , Phe319, <b>Tyr322</b>                                                                                                                                                        | 12 |    |
| Quercetin dihexoside       | -7.770 | MOE      | -7.94  | Leu53, <b>Trp113</b> , <b>Phe121</b> , <b>Asn134</b> , <b>Ile137</b> , <b>Ser138</b> , <b>Leu141</b> , <b>Met192</b> , <b>Arg196</b> , <b>Tyr201</b> , Glu204, Ile213, Tyr215, Asn225, Leu228, Phe285, Thr290, <b>Asp293</b> , <b>Asp311</b> , <b>Thr314</b> , Gln315, <b>Ser318</b> | 22 | 13 |
|                            |        | AutoVina | -7.6   | <b>Trp113</b> , <b>Phe121</b> , <b>Asn134</b> , <b>Ile137</b> , <b>Ser138</b> , <b>Leu141</b> , <b>Met192</b> , <b>Arg196</b> , <b>Tyr201</b> , Ala210, Phe286, <b>Asp293</b> , Arg297, Ile310, <b>Asp311</b> , <b>Thr314</b> , <b>Ser318</b> , Phe319                               | 18 |    |
| Isorhamnetin-3-O-glucoside | -7.680 | MOE      | -6.661 | <b>Trp113</b> , <b>Phe121</b> , <b>Asn134</b> , <b>Ile137</b> , <b>Met192</b> , Ala210, Cys211, Val212, Ile213, Tyr215, <b>Thr224</b> , <b>Asn225</b> , <b>Asp293</b> , Arg297, <b>Thr314</b> , <b>Gln315</b> , <b>Ser318</b> , <b>Phe319</b> , Tyr322                               | 19 | 12 |
|                            |        | AutoVina | -8.7   | <b>Trp113</b> , Ile117, <b>Phe121</b> , <b>Asn134</b> , <b>Ile137</b> , Ser138, Leu141, <b>Met192</b> , Arg196, <b>Thr224</b> , <b>Asn225</b> , Leu228, Phe286, Ser289, Thr290, <b>Asp293</b> , <b>Thr314</b> , <b>Gln315</b> , <b>Ser318</b> , <b>Phe319</b>                        | 20 |    |
| Cholecalciferol            | -7.596 | MOE      | -7.392 | <b>Trp113</b> , <b>Ile117</b> , <b>Phe121</b> , Asn134, <b>Ile137</b> , Leu141, Arg196, <b>Tyr201</b> , Glu204, <b>Phe286</b> , <b>Asp311</b> , <b>Thr314</b> , <b>Gln315</b> , <b>Ser318</b> , <b>Phe319</b> , Ala321, <b>Tyr322</b>                                                | 17 | 12 |
|                            |        | AutoVina | -7.8   | Leu53, <b>Trp113</b> , <b>Ile117</b> , <b>Phe121</b> , <b>Ile137</b> , <b>Tyr201</b> , <b>Phe286</b> , <b>Asp311</b> , <b>Thr314</b> , <b>Gln315</b> , <b>Ser318</b> , <b>Phe319</b> , <b>Tyr322</b>                                                                                 | 13 |    |

The residues in bold are the residues that form interactions with the molecule in both software.

**Table S11.** UD phytochemicals mean values against the 5 receptors. Values in kcal/mol.

| Phytochemical                  | PubChem CID | HR1     | NKR1    | CLR1    | CRTH2   | BK2R    | Mean Value | Deviation |
|--------------------------------|-------------|---------|---------|---------|---------|---------|------------|-----------|
| Amentoflavone                  | 5281600     | -6.3622 | -9.6049 | -9.5653 | -8.8802 | -8.3849 | -8.5595    | 1.3291    |
| Alpha-tocotrienol              | 5282347     | -7.3107 | -8.4025 | -9.1082 | -9.2589 | -6.9592 | -8.2079    | 1.0389    |
| Neoxanthin                     | 5282217     | -6.8562 | -7.9645 | -8.8725 | -9.5292 | -7.1843 | -8.0813    | 1.1227    |
| 7 $\alpha$ -Hydroxy sitosterol | 161816      | -7.4651 | -7.9638 | -7.9392 | -8.4453 | -8.5691 | -8.0765    | 0.4427    |
| Isorhamnetin 3-O-rutinoside    | 5481663     | -6.1382 | -8.5197 | -8.3735 | -8.6986 | -8.1819 | -7.9824    | 1.0483    |
| $\gamma$ -sitosterol           | 457801      | -7.3376 | -7.7386 | -7.6039 | -8.3561 | -8.6040 | -7.9280    | 0.5314    |
| Cholecalciferol                | 5280795     | -7.2943 | -7.6479 | -8.1808 | -8.7050 | -7.5965 | -7.8849    | 0.5586    |
| Kaempferol-3-rutinoside        | 5318767     | -5.9934 | -8.4043 | -8.4183 | -8.1471 | -8.2785 | -7.8483    | 1.0427    |
| Isorhamnetin rutinoside        | 133562525   | -6.0691 | -7.8149 | -7.9169 | -8.6208 | -8.7188 | -7.8281    | 1.0635    |
| Epigallocatechin gallate       | 65064       | -6.4312 | -7.8261 | -8.9232 | -8.3555 | -7.5162 | -7.8104    | 0.9387    |
| Hecogenin                      | 91453       | -7.0916 | -7.9539 | -8.0591 | -8.8530 | -6.8492 | -7.7613    | 0.8059    |
| Solanidine                     | 65727       | -7.2348 | -7.3500 | -7.7051 | -8.7038 | -7.7819 | -7.7551    | 0.5784    |

|                                                        |           |         |         |         |         |         |         |        |
|--------------------------------------------------------|-----------|---------|---------|---------|---------|---------|---------|--------|
| 7 $\beta$ -Hydroxy-sitosterol                          | 12309569  | -5.9741 | -7.7017 | -7.8675 | -8.4825 | -8.6450 | -7.7342 | 1.0614 |
| Dicaffeoylquinic acid                                  | 12358846  | -6.5190 | -8.1286 | -8.2536 | -8.5119 | -7.2052 | -7.7236 | 0.8346 |
| Epicatechin gallate                                    | 107905    | -6.4581 | -7.3296 | -8.9389 | -8.6107 | -7.1807 | -7.7036 | 1.0385 |
| Isorhamnetin-3-O-glucoside                             | 5318645   | -5.7953 | -8.3667 | -8.0454 | -8.6119 | -7.6810 | -7.7000 | 1.1207 |
| Beta-Sitosterol                                        | 222284    | -7.3879 | -7.5666 | -7.5114 | -8.5866 | -7.3827 | -7.6870 | 0.5091 |
| Quercetin dihexoside                                   | 5320835   | -6.2730 | -8.4205 | -7.7118 | -8.2362 | -7.7700 | -7.6823 | 0.8436 |
| Quercetin rhamnoside                                   | 15939939  | -5.8567 | -7.9486 | -8.2821 | -8.2158 | -7.8835 | -7.6373 | 1.0098 |
| Apigenin-7-O-glucoside                                 | 44257792  | -6.8922 | -7.7854 | -8.2634 | -8.4462 | -6.7872 | -7.6349 | 0.7658 |
| Sitosterol- $\beta$ -D-glucoside                       | 91884650  | -6.4003 | -7.9531 | -8.7461 | -8.2148 | -6.8304 | -7.6289 | 0.9802 |
| Phytosterols                                           | 12303662  | -7.3311 | -7.5270 | -7.8672 | -8.5865 | -6.7591 | -7.6142 | 0.6761 |
| Peonidin 3-O-rutinoside                                | 44256842  | -5.5160 | -8.5767 | -8.4791 | -8.5170 | -6.7149 | -7.5607 | 1.3862 |
| Quercitrin                                             | 5280459   | -5.5743 | -8.4552 | -7.9197 | -8.1540 | -7.3266 | -7.4859 | 1.1461 |
| 9-amino-camptothecin                                   | 72402     | -5.2801 | -7.4164 | -8.2912 | -8.8538 | -7.3328 | -7.4348 | 1.3602 |
| Kaempferol rhamnoside                                  | 5835713   | -5.7680 | -7.7362 | -7.6518 | -8.7779 | -7.2266 | -7.4321 | 1.0912 |
| Quercetin-3-O-glucoside                                | 25203368  | -5.6563 | -8.1769 | -7.7072 | -8.3310 | -7.2812 | -7.4305 | 1.0741 |
| Kaempferol-3-O-glucoside                               | 5282102   | -5.6214 | -7.9124 | -7.5151 | -8.5024 | -7.5620 | -7.4226 | 1.0815 |
| Quercetin-3-glucoside                                  | 5280804   | -5.5699 | -8.1405 | -7.4166 | -8.4531 | -7.2935 | -7.3747 | 1.1197 |
| Bioallethrin                                           | 15558638  | -5.4565 | -7.1724 | -7.6128 | -8.3146 | -8.1972 | -7.3507 | 1.1548 |
| Piperine                                               | 638024    | -6.7045 | -6.9975 | -7.3059 | -7.6828 | -7.7730 | -7.2927 | 0.4517 |
| Caffeoyl feruloyl tartaric acid                        | 129724266 | -6.3052 | -7.8550 | -7.7324 | -7.9911 | -6.5747 | -7.2917 | 0.7887 |
| 10-gingerdione                                         | 5317591   | -6.5775 | -7.1963 | -7.3408 | -8.2780 | -6.9098 | -7.2605 | 0.6394 |
| 6-aminochrysene                                        | 17534     | -6.6466 | -7.2198 | -7.4682 | -7.7445 | -7.1307 | -7.2420 | 0.4096 |
| Pukateine                                              | 442340    | -6.1982 | -7.3474 | -7.6025 | -8.5737 | -6.3647 | -7.2173 | 0.9709 |
| (+)-Neo-olivil                                         | 9976812   | -5.8546 | -7.0561 | -7.8146 | -8.3863 | -6.8927 | -7.2008 | 0.9631 |
| Chlorogenic acid                                       | 1794427   | -6.6335 | -7.0618 | -7.4535 | -8.1129 | -6.5466 | -7.1616 | 0.6437 |
| Isolariciresinol                                       | 160521    | -5.9928 | -7.1439 | -7.4408 | -7.9258 | -7.2821 | -7.1571 | 0.7146 |
| Kaempferol pentoside                                   | 14749097  | -5.5959 | -7.4915 | -7.2946 | -8.3687 | -6.9992 | -7.1500 | 1.0075 |
| Ursolic acid                                           | 64945     | -5.9003 | -7.1326 | -7.2937 | -8.9587 | -6.2865 | -7.1143 | 1.1825 |
| 4-O-Caffeoylquinic acid                                | 58427569  | -6.4796 | -7.0126 | -7.1985 | -7.9074 | -6.7805 | -7.0757 | 0.5370 |
| Deoxyharringtonine                                     | 285342    | -5.8281 | -7.2078 | -7.7410 | -8.5847 | -5.8720 | -7.0467 | 1.1977 |
| 8-dehydrogingerdione                                   | 131752598 | -6.6981 | -6.4452 | -7.1146 | -8.0165 | -6.9392 | -7.0427 | 0.6000 |
| Incensole oxide acetate                                | 73755086  | -5.9571 | -6.8593 | -7.3097 | -8.0449 | -6.8920 | -7.0126 | 0.7593 |
| Neochlorogenic acid                                    | 5280633   | -6.1686 | -6.9089 | -7.2051 | -7.8653 | -6.8059 | -6.9907 | 0.6180 |
| Apoatropine                                            | 64695     | -6.3308 | -6.6831 | -7.1208 | -7.5152 | -7.2744 | -6.9848 | 0.4750 |
| Carnosol                                               | 442009    | -6.5238 | -6.4984 | -7.6619 | -8.2736 | -5.8882 | -6.9691 | 0.9708 |
| 3,4-dimethoxychalcone                                  | 5354494   | -6.6114 | -6.7287 | -7.4917 | -7.3168 | -6.5988 | -6.9495 | 0.4228 |
| [1,1-Bicyclopropyl-2-octanoic acid 2hexyl-methyl ester | 50930793  | -6.2276 | -6.9148 | -6.9217 | -7.9675 | -6.5037 | -6.9070 | 0.6613 |
| Estra-1,3,5(10)-trien-17B-ol                           | 9811784   | -6.5498 | -7.1896 | -7.3148 | -7.4950 | -5.8608 | -6.8820 | 0.6728 |
| Integerrimine                                          | 5281733   | -6.2116 | -6.4280 | -7.1716 | -8.9099 | -5.6787 | -6.8799 | 1.2549 |
| Farnesylacetone                                        | 1711945   | -6.3866 | -6.7844 | -6.9455 | -7.7011 | -6.5617 | -6.8758 | 0.5080 |

|                                      |          |         |         |         |         |         |         |        |
|--------------------------------------|----------|---------|---------|---------|---------|---------|---------|--------|
| Caffeoylquinic acid                  | 10155076 | -6.4479 | -6.8281 | -7.0850 | -7.4892 | -6.4996 | -6.8699 | 0.4321 |
| Neophytadiene                        | 10446    | -6.1466 | -6.2363 | -7.0023 | -7.6571 | -7.3071 | -6.8698 | 0.6620 |
| Incensole oxide                      | 90470329 | -6.3100 | -6.7215 | -7.1159 | -8.3293 | -5.8281 | -6.8609 | 0.9501 |
| Isopilosine                          | 72312    | -6.2071 | -6.8846 | -6.7655 | -7.4039 | -6.9779 | -6.8478 | 0.4315 |
| 1,2-Diguaiacyl-1,3-propanediol       | 6426042  | -5.7753 | -6.8790 | -7.2153 | -7.5157 | -6.8443 | -6.8459 | 0.6581 |
| Heptadecanoic acid                   | 10465    | -5.7894 | -5.8944 | -6.5392 | -7.3154 | -8.6476 | -6.8372 | 1.1813 |
| Luteolin                             | 5280445  | -6.1779 | -7.0635 | -7.1435 | -7.3755 | -6.3256 | -6.8172 | 0.5313 |
| Dihydrokavain                        | 10220256 | -6.1289 | -6.3316 | -6.9994 | -7.1107 | -7.3745 | -6.7890 | 0.5328 |
| Catechin                             | 9064     | -5.6033 | -6.7767 | -7.2409 | -7.3299 | -6.7350 | -6.7371 | 0.6878 |
| Catechin hydrate                     | 107957   | -5.7423 | -6.7530 | -7.4298 | -7.2184 | -6.5386 | -6.7364 | 0.6597 |
| Eleutheroside B                      | 5316860  | -5.8462 | -6.8671 | -6.9259 | -7.9283 | -6.0931 | -6.7321 | 0.8185 |
| Podocarpic acid                      | 93017    | -6.0328 | -6.5483 | -6.8506 | -7.4364 | -6.7823 | -6.7301 | 0.5088 |
| Flavone                              | 10680    | -6.2877 | -6.4600 | -6.9261 | -7.3831 | -6.3565 | -6.6827 | 0.4642 |
| Osthole                              | 10228    | -5.6363 | -6.6026 | -6.9366 | -7.3753 | -6.7701 | -6.6642 | 0.6426 |
| Convolvamine                         | 420422   | -6.2133 | -6.8045 | -7.3396 | -7.2265 | -5.6852 | -6.6538 | 0.6988 |
| Isorhamnetin                         | 5281654  | -6.0470 | -6.7048 | -7.2750 | -7.4925 | -5.7265 | -6.6491 | 0.7616 |
| Phytol                               | 5280435  | -6.2047 | -6.3331 | -6.9966 | -7.7746 | -5.8430 | -6.6304 | 0.7637 |
| Arachidonic acid                     | 444899   | -6.3187 | -6.6338 | -6.8767 | -7.9799 | -5.2140 | -6.6046 | 0.9977 |
| $\beta$ -Bisabolene                  | 10104370 | -5.9351 | -6.4944 | -6.7929 | -7.1807 | -6.4754 | -6.5757 | 0.4583 |
| Linolenic acid                       | 5280934  | -6.2521 | -6.4886 | -6.5454 | -7.6704 | -5.8759 | -6.5665 | 0.6710 |
| Dibutyl phthalate                    | 3026     | -5.3436 | -6.3070 | -6.5974 | -7.2289 | -7.3363 | -6.5626 | 0.8055 |
| 9-Hydroxy-10,12-octadecadienoic acid | 1927     | -5.9247 | -6.4005 | -6.6195 | -7.5051 | -6.3579 | -6.5615 | 0.5845 |
| $\delta$ -Cadinene                   | 441005   | -5.8228 | -6.6077 | -6.6929 | -7.0815 | -6.5717 | -6.5553 | 0.4570 |
| Naringenin                           | 932      | -5.9078 | -6.6512 | -6.9378 | -7.5576 | -5.7045 | -6.5518 | 0.7588 |
| Crysoeriol                           | 5280666  | -6.0959 | -6.9503 | -7.2555 | -7.5966 | -4.7706 | -6.5338 | 1.1319 |
| Apigenin                             | 5280443  | -6.0489 | -6.7676 | -6.9276 | -7.5516 | -5.3286 | -6.5248 | 0.8563 |
| O-Feruloyl quinic acid               | 10177048 | -5.2641 | -7.0122 | -7.2897 | -7.7728 | -5.2649 | -6.5207 | 1.1786 |
| Kaempferol                           | 5280863  | -5.8954 | -6.4778 | -7.0332 | -7.4884 | -5.7006 | -6.5191 | 0.7524 |
| Flavan                               | 94156    | -6.1529 | -6.2548 | -6.9350 | -7.2553 | -5.8413 | -6.4878 | 0.5860 |
| $\gamma$ -Cadinene                   | 92313    | -5.7030 | -6.6488 | -6.4682 | -7.1196 | -6.4573 | -6.4794 | 0.5104 |
| Kavain                               | 5281565  | -5.8292 | -6.0151 | -6.7440 | -6.6608 | -7.1478 | -6.4794 | 0.5450 |
| Secoisolariciresinol                 | 65373    | -5.7888 | -6.8865 | -6.7604 | -7.4772 | -5.4568 | -6.4739 | 0.8311 |
| 4-shogaol                            | 9794897  | -6.0727 | -6.2321 | -6.6070 | -6.9925 | -6.4399 | -6.4688 | 0.3561 |
| Isotachioside                        | 15098566 | -5.3638 | -6.4890 | -6.3345 | -6.9741 | -7.1811 | -6.4685 | 0.7075 |
| Caffeoylmalic acid                   | 6124299  | -5.8538 | -6.4262 | -6.9698 | -6.8770 | -6.1951 | -6.4644 | 0.4670 |
| Caffeoyl tartaric acid               | 9857913  | -5.7412 | -6.6354 | -6.5801 | -6.7847 | -6.5685 | -6.4620 | 0.4120 |
| Quinic acid                          | 6508     | -5.1402 | -6.6492 | -6.5813 | -7.4150 | -6.5218 | -6.4615 | 0.8228 |
| $\alpha$ -Copaene                    | 442355   | -5.8725 | -6.2691 | -6.7851 | -6.8522 | -6.4707 | -6.4499 | 0.4002 |
| Feruloyl malate                      | 71694479 | -5.8101 | -6.5362 | -7.0136 | -7.0929 | -5.7877 | -6.4481 | 0.6298 |
| $\alpha$ -Humulene                   | 5281520  | -5.8863 | -6.6616 | -6.1420 | -7.2921 | -6.2074 | -6.4379 | 0.5533 |
| Myricetin                            | 5281672  | -5.7343 | -6.6571 | -7.0894 | -7.3220 | -5.3530 | -6.4311 | 0.8553 |
| Absciscic acid                       | 5375199  | -5.6874 | -6.4988 | -6.3993 | -7.2107 | -6.3533 | -6.4299 | 0.5414 |

|                                                                       |           |         |         |         |         |         |         |        |
|-----------------------------------------------------------------------|-----------|---------|---------|---------|---------|---------|---------|--------|
| Quercetin                                                             | 5280343   | -5.7511 | -6.4868 | -7.2135 | -7.4806 | -5.1994 | -6.4263 | 0.9613 |
| cis-10-Heptadecenoic acid                                             | 5312435   | -5.8718 | -6.1868 | -6.4549 | -7.4693 | -6.1430 | -6.4251 | 0.6192 |
| Hexahydrofarnesylacetone                                              | 10408     | -5.8428 | -6.4893 | -6.4975 | -7.7354 | -5.4361 | -6.4002 | 0.8718 |
| Genistein                                                             | 5280961   | -5.7754 | -6.6600 | -6.9841 | -7.4101 | -5.1651 | -6.3989 | 0.9143 |
| 6-benzylaminopurine                                                   | 62389     | -5.7938 | -6.2981 | -6.8932 | -6.6549 | -6.3148 | -6.3909 | 0.4162 |
| $\beta$ - Vetivenene                                                  | 14475467  | -5.8801 | -6.0860 | -6.6519 | -6.9783 | -6.3451 | -6.3883 | 0.4385 |
| $\beta$ -Selinene                                                     | 442393    | -5.7991 | -5.9835 | -6.5378 | -6.8892 | -6.7091 | -6.3837 | 0.4709 |
| $\beta$ - Sesquiphellandrene                                          | 519764    | -6.1487 | -6.0864 | -6.5165 | -6.7504 | -6.2213 | -6.3446 | 0.2804 |
| Isopropyl dodecanoate                                                 | 25068     | -5.7310 | -6.1037 | -6.2993 | -6.6213 | -6.9638 | -6.3438 | 0.4734 |
| Anthocyanins                                                          | 145858    | -6.2222 | -6.3687 | -6.8287 | -7.3901 | -4.9083 | -6.3436 | 0.9228 |
| Calamenene                                                            | 6429077   | -5.3714 | -6.3695 | -6.4727 | -7.0989 | -6.3900 | -6.3405 | 0.6195 |
| $\alpha$ -Curcumene                                                   | 92139     | -5.9891 | -6.1173 | -6.5559 | -7.0560 | -5.9418 | -6.3320 | 0.4718 |
| $\alpha$ -Selinene                                                    | 10856614  | -5.7665 | -5.9521 | -6.4786 | -7.0541 | -6.4046 | -6.3312 | 0.5031 |
| $\beta$ -Bourbonene                                                   | 62566     | -5.5712 | -6.4420 | -6.4172 | -6.9849 | -6.2395 | -6.3309 | 0.5082 |
| 2H-Indeno[1,2-b]furan-2-one, 3,3a,4,5,6,7,8,8b-octahydro-8,8-dimethyl | 605626    | -5.7166 | -6.7316 | -6.1499 | -6.9409 | -6.0810 | -6.3240 | 0.5012 |
| Homatropine                                                           | 5282593   | -6.1455 | -6.6355 | -6.6187 | -7.2388 | -4.8487 | -6.2974 | 0.8980 |
| Methyl palmitate                                                      | 8181      | -5.6972 | -6.0816 | -6.5060 | -6.9977 | -6.1495 | -6.2864 | 0.4904 |
| Pterostilbene                                                         | 5281727   | -6.1096 | -6.3931 | -6.6795 | -7.2684 | -4.9697 | -6.2840 | 0.8507 |
| Benzyl salicilate                                                     | 8363      | -5.9221 | -6.1509 | -7.0944 | -7.0630 | -5.1424 | -6.2745 | 0.8239 |
| Farnesol                                                              | 445070    | -5.8619 | -6.3446 | -6.5692 | -6.7576 | -5.7954 | -6.2657 | 0.4256 |
| $\beta$ -Caryophyllene                                                | 5281515   | -5.7762 | -6.1732 | -6.0858 | -7.0162 | -6.2386 | -6.2580 | 0.4594 |
| Rutin                                                                 | 5280805   | -5.3880 | -6.0581 | -6.4438 | -6.9121 | -6.4303 | -6.2465 | 0.5675 |
| Palmitic acid                                                         | 985       | -5.9119 | -6.0657 | -6.2614 | -6.9352 | -6.0105 | -6.2369 | 0.4106 |
| Tachioside                                                            | 11962143  | -5.2972 | -6.6465 | -6.3336 | -7.1652 | -5.4803 | -6.1845 | 0.7875 |
| $\alpha$ - Copaene-8-ol                                               | 25086830  | -5.8932 | -6.1527 | -6.1982 | -6.9240 | -5.7320 | -6.1800 | 0.4576 |
| p-Coumaroylmalic acid                                                 | 129720114 | -5.3350 | -6.1971 | -6.6970 | -6.8783 | -5.7354 | -6.1685 | 0.6454 |
| Lutein                                                                | 5281243   | -0.2712 | -7.8756 | -9.1613 | -7.8382 | -5.6723 | -6.1637 | 3.5243 |
| Caryophyllene oxide                                                   | 1742210   | -5.6242 | -6.0024 | -6.3045 | -6.9194 | -5.9547 | -6.1610 | 0.4878 |
| Myristic acid                                                         | 11005     | -5.5500 | -5.8020 | -5.9892 | -6.6023 | -6.8316 | -6.1550 | 0.5422 |
| 4-(4-Hydroxy-2,6,6-trimethyl1-cyclohexen-1-yl)-3-buten2-one           | 538953    | -5.2198 | -6.4290 | -6.2392 | -6.6031 | -6.2536 | -6.1489 | 0.5402 |
| Palmitoleic acid                                                      | 445638    | -5.8937 | -5.8311 | -6.1812 | -6.9736 | -5.6997 | -6.1159 | 0.5108 |
| Arbutine                                                              | 440936    | -5.5010 | -6.0119 | -6.1661 | -6.6069 | -6.2588 | -6.1089 | 0.4040 |
| Safranal                                                              | 61041     | -5.1985 | -6.9771 | -6.9494 | -6.8424 | -4.5233 | -6.0981 | 1.1555 |
| 1,2-Benzenedicarboxylic acid                                          | 90531     | -5.2133 | -6.0589 | -6.3786 | -6.5379 | -6.1890 | -6.0755 | 0.5153 |
| 4-methyl-7-ethoxycoumarin                                             | 66595     | -5.3936 | -6.0342 | -6.3645 | -6.5461 | -5.9986 | -6.0674 | 0.4408 |
| 3-Hydroxy-damascone                                                   | 5366075   | -5.3113 | -5.8678 | -6.0572 | -6.9024 | -6.0497 | -6.0377 | 0.5711 |
| Myristoleic acid                                                      | 5281119   | -5.7930 | -5.8311 | -6.0624 | -6.6046 | -5.8673 | -6.0317 | 0.3367 |
| $\alpha$ -Longipinene                                                 | 520957    | -5.7151 | -5.6431 | -5.9151 | -6.6508 | -6.1037 | -6.0055 | 0.4031 |
| (E)-Geranyl acetone                                                   | 1713001   | -5.6101 | -5.8823 | -6.2529 | -6.3513 | -5.9178 | -6.0029 | 0.3000 |

|                                                              |          |         |         |         |         |         |         |        |
|--------------------------------------------------------------|----------|---------|---------|---------|---------|---------|---------|--------|
| $\beta$ -Ionone                                              | 638014   | -5.2321 | -6.0650 | -6.0993 | -6.6829 | -5.9304 | -6.0019 | 0.5184 |
| 4-(3-Hydroxy-1-butyn-1-yl)-3,5,5-trimethyl-2-cyclohexen-1-ol | 5280654  | -5.3517 | -5.5642 | -6.2163 | -6.6378 | -6.0306 | -5.9601 | 0.5140 |
| Harmol                                                       | 68094    | -5.3526 | -5.8927 | -5.9489 | -6.4950 | -6.0545 | -5.9487 | 0.4087 |
| Geranyl acetone                                              | 1549778  | -5.6919 | -5.8844 | -6.1236 | -6.7178 | -5.2669 | -5.9369 | 0.5377 |
| Carvacryl acetate                                            | 80792    | -5.3688 | -5.8990 | -6.1173 | -6.5844 | -5.6583 | -5.9255 | 0.4618 |
| $\alpha$ -Ionone                                             | 5282108  | -5.3409 | -5.9716 | -6.0411 | -6.4843 | -5.7416 | -5.9159 | 0.4192 |
| 3-Oxo-a-ionol                                                | 5370052  | -5.0972 | -5.9972 | -6.3270 | -6.4564 | -5.6400 | -5.9035 | 0.5508 |
| $\alpha$ -Terpinyl acetate                                   | 111037   | -5.3116 | -5.7212 | -6.0232 | -6.4705 | -5.9521 | -5.8957 | 0.4247 |
| Harmine                                                      | 5280953  | -5.4396 | -6.1734 | -6.2831 | -6.8679 | -4.6331 | -5.8794 | 0.8621 |
| Carvylacetate                                                | 7335     | -5.3149 | -5.8927 | -5.9939 | -6.4713 | -5.7205 | -5.8787 | 0.4206 |
| Epicatechin                                                  | 72276    | -5.6570 | -6.7852 | -7.3543 | -3.2578 | -6.2685 | -5.8645 | 1.5865 |
| Silane, triethyl(2-phenylethoxy)                             | 610043   | -5.2711 | -5.6942 | -6.1969 | -5.9368 | -6.1788 | -5.8555 | 0.3858 |
| 4-methylmethoxycoumarin                                      | 223821   | -5.3371 | -5.8328 | -6.0223 | -6.2779 | -5.7006 | -5.8341 | 0.3526 |
| Adenosine                                                    | 60961    | -5.3056 | -6.0485 | -6.4404 | -6.6054 | -4.6645 | -5.8129 | 0.8145 |
| Hydrocotarnine                                               | 3646     | -5.2446 | -6.0794 | -5.9947 | -6.4545 | -5.2006 | -5.7947 | 0.5504 |
| Carvacrol                                                    | 10364    | -5.1289 | -5.4227 | -5.5043 | -5.9286 | -6.9369 | -5.7843 | 0.7050 |
| Shikimic acid                                                | 8742     | -5.3374 | -5.7985 | -6.3755 | -6.3123 | -4.9967 | -5.7641 | 0.6014 |
| 4-aminoantipyrine                                            | 2151     | -5.1906 | -5.5495 | -6.0895 | -6.3452 | -5.5881 | -5.7525 | 0.4606 |
| Dodecendioic acid                                            | 5283028  | -5.2954 | -5.4128 | -5.7982 | -6.5128 | -5.7271 | -5.7492 | 0.4757 |
| Phosphatidylcholine                                          | 10425706 | -4.8376 | -5.7325 | -6.1749 | -6.3384 | -5.6098 | -5.7386 | 0.5870 |
| 1-Dodecanamine, N, N-dimethyl                                | 8168     | -5.3214 | -5.6511 | -5.7060 | -6.2390 | -5.7228 | -5.7280 | 0.3290 |
| 3,4-Dimethyl-5-pentylidene-2(5H)-furanone                    | 6433214  | -5.1422 | -5.7655 | -5.8252 | -6.2006 | -5.6683 | -5.7203 | 0.3810 |
| $\beta$ -carotene                                            | 5280489  | 4.2123  | -7.6869 | -8.8746 | -8.8681 | -7.3603 | -5.7155 | 5.5917 |
| Phenylalanine                                                | 6140     | -5.1290 | -5.3283 | -5.5109 | -5.5373 | -7.0157 | -5.7042 | 0.7512 |
| Esculetin                                                    | 5281416  | -4.9242 | -5.3585 | -5.6528 | -5.9068 | -6.6121 | -5.6908 | 0.6315 |
| Lotaustralin                                                 | 441467   | -4.8642 | -5.6851 | -5.5574 | -6.4927 | -5.7928 | -5.6784 | 0.5817 |
| Cinnamyl acetate                                             | 5282110  | -5.2420 | -5.5954 | -5.9324 | -6.0197 | -5.5137 | -5.6606 | 0.3178 |
| Ferulic acid                                                 | 445858   | -4.8177 | -5.5267 | -5.8818 | -6.0903 | -5.9328 | -5.6498 | 0.5088 |
| Eugenol                                                      | 3314     | -4.6486 | -5.6217 | -5.6500 | -5.6501 | -6.5933 | -5.6327 | 0.6877 |
| 3,4-Dimethyl-5-pentylfuran-2(5H)-one                         | 13192443 | -5.1268 | -5.4865 | -5.8485 | -6.1177 | -5.5396 | -5.6238 | 0.3766 |
| Vitamin B5                                                   | 6613     | -4.7431 | -5.2418 | -5.4048 | -5.9301 | -6.6212 | -5.5882 | 0.7162 |
| 1-Methyl naphthalene                                         | 7002     | -5.3832 | -5.3720 | -5.9389 | -5.6152 | -5.5235 | -5.5666 | 0.2315 |
| 2(3H)-Naphthalenone, 4,4a,5,6,7,8-hexahydro-1-methoxy        | 534313   | -5.1183 | -5.8116 | -5.6172 | -6.0140 | -5.1719 | -5.5466 | 0.3929 |
| DL-methyl-m-tyrosine                                         | 2110     | -5.2422 | -5.6073 | -5.7318 | -6.0838 | -5.0573 | -5.5444 | 0.4058 |
| Sinapyl alcohol                                              | 5280507  | -4.5369 | -5.5558 | -5.7658 | -6.1261 | -5.6624 | -5.5294 | 0.5949 |
| Carvone                                                      | 7439     | -5.1828 | -5.3002 | -5.6138 | -5.8639 | -5.6723 | -5.5266 | 0.2793 |

|                                               |          |         |         |         |         |         |         |        |
|-----------------------------------------------|----------|---------|---------|---------|---------|---------|---------|--------|
| Methylcoumarin                                | 17130    | -5.1152 | -5.5132 | -5.8441 | -6.0065 | -5.0901 | -5.5138 | 0.4154 |
| Diphenyl                                      | 7095     | -5.5218 | -5.5660 | -5.7659 | -6.0304 | -4.6810 | -5.5130 | 0.5066 |
| 1,2-O-isopropylidene-D-glucoside              | 87704    | -5.0145 | -5.3462 | -5.5310 | -6.1776 | -5.4104 | -5.4959 | 0.4264 |
| Salicylic alcohol                             | 5146     | -4.8123 | -4.9981 | -5.5048 | -5.2264 | -6.8679 | -5.4819 | 0.8169 |
| 1-Hydroxy-1-(4-hydroxyphenyl)-2-propanone     | 10261435 | -5.6043 | -5.1653 | -5.5189 | -5.8058 | -5.2763 | -5.4741 | 0.2566 |
| Bornyl acetate                                | 6448     | -5.6084 | -5.0820 | -5.5147 | -6.0054 | -5.0871 | -5.4595 | 0.3887 |
| Methyl eugenol                                | 7127     | -4.8827 | -5.5823 | -5.5052 | -5.8331 | -5.4938 | -5.4594 | 0.3502 |
| Vanillic acid                                 | 8468     | -4.5669 | -4.9937 | -5.2518 | -5.2792 | -7.1638 | -5.4511 | 0.9992 |
| Caffeic acid                                  | 689043   | -4.9517 | -5.2185 | -5.7374 | -5.8378 | -5.4156 | -5.4322 | 0.3655 |
| Lauric acid                                   | 3893     | -5.2231 | -5.2221 | -5.6035 | -6.0541 | -5.0451 | -5.4296 | 0.4043 |
| Isopropyl- $\beta$ -D-thio-galacto-pyranoside | 656894   | -4.7344 | -5.2554 | -5.6489 | -5.9176 | -5.5739 | -5.4260 | 0.4530 |
| Carnosine                                     | 439224   | -5.0618 | -5.3580 | -5.1692 | -6.1970 | -5.2371 | -5.4046 | 0.4558 |
| Cumin aldehyde                                | 326      | -4.8067 | -5.2423 | -5.2117 | -5.7608 | -5.9757 | -5.3994 | 0.4674 |
| Sinapic acid                                  | 637775   | -4.6197 | -5.4570 | -5.8421 | -6.0595 | -5.0047 | -5.3966 | 0.5913 |
| p-Cymene                                      | 7463     | -4.9832 | -5.2950 | -5.2840 | -5.5873 | -5.8280 | -5.3955 | 0.3226 |
| Violaxanthin                                  | 448438   | 3.9458  | -7.5934 | -8.9456 | -8.1983 | -6.0962 | -5.3775 | 5.3160 |
| $\beta$ -Homocyclocitral                      | 61124    | -4.8749 | -5.5430 | -5.3879 | -5.8332 | -5.2171 | -5.3712 | 0.3582 |
| Homovanillyl alcohol                          | 16928    | -4.6889 | -5.1832 | -5.3027 | -5.3908 | -6.2669 | -5.3665 | 0.5719 |
| Umbelliferone                                 | 5281426  | -5.0417 | -5.3074 | -5.9450 | -5.6618 | -4.8053 | -5.3522 | 0.4596 |
| Coniferol                                     | 1549095  | -4.7666 | -5.4568 | -5.7612 | -5.9610 | -4.7811 | -5.3453 | 0.5518 |
| Thymol                                        | 6989     | -5.0208 | -5.3568 | -5.2675 | -5.5347 | -5.4401 | -5.3240 | 0.1963 |
| $\alpha$ - Terpineol                          | 17100    | -4.9173 | -5.1544 | -5.4499 | -5.7234 | -5.3045 | -5.3099 | 0.3037 |
| 4-Acetyl-2-methylphenol                       | 70135    | -5.1517 | -5.3063 | -5.4874 | -5.4362 | -5.1324 | -5.3028 | 0.1611 |
| Cinnamide                                     | 5273472  | -5.1799 | -5.1574 | -5.5014 | -5.5725 | -5.0874 | -5.2997 | 0.2207 |
| p-coumaric acid                               | 637542   | -4.7502 | -5.1093 | -5.4714 | -5.7841 | -5.2944 | -5.2819 | 0.3875 |
| Anthranilic acid methyl ester                 | 8635     | -4.9190 | -4.7690 | -5.3613 | -5.2011 | -6.0207 | -5.2542 | 0.4872 |
| Oxime- methoxy-phenyl                         | 9602988  | -4.7400 | -5.0545 | -5.3849 | -5.2530 | -5.7809 | -5.2427 | 0.3867 |
| Linalool                                      | 6549     | -5.1607 | -5.0813 | -5.6415 | -5.6818 | -4.5482 | -5.2227 | 0.4650 |
| Hydroxycinnamaldehyde                         | 71407359 | -4.9221 | -4.9348 | -5.3165 | -5.5450 | -5.3611 | -5.2159 | 0.2760 |
| Camphor                                       | 2537     | -5.0866 | -4.4741 | -5.1348 | -5.4630 | -5.8348 | -5.1986 | 0.5040 |
| $\beta$ -Cyclocitral                          | 9895     | -4.7897 | -5.2637 | -5.3249 | -5.5714 | -5.0176 | -5.1934 | 0.2996 |
| Decan-2-one                                   | 12741    | -4.7636 | -4.9097 | -5.1246 | -5.6247 | -5.4819 | -5.1809 | 0.3669 |
| Decanal                                       | 8175     | -4.8324 | -4.9359 | -5.3154 | -5.7518 | -5.0496 | -5.1770 | 0.3683 |
| Syringic acid                                 | 10742    | -4.4130 | -5.2982 | -5.5740 | -5.4732 | -5.1071 | -5.1731 | 0.4606 |
| n-acetyl-L-glutamine                          | 182230   | -5.0439 | -4.9032 | -5.2305 | -5.4322 | -5.2297 | -5.1679 | 0.2019 |
| (E)-Anethole                                  | 637563   | -4.7835 | -5.2422 | -5.1679 | -5.4717 | -5.0976 | -5.1526 | 0.2497 |
| Borneol                                       | 64685    | -4.9783 | -4.4676 | -4.8554 | -5.3135 | -6.0626 | -5.1354 | 0.6001 |
| Indole                                        | 798      | -4.8180 | -4.5620 | -5.1387 | -4.8917 | -6.2571 | -5.1335 | 0.6609 |
| Synephrine                                    | 7172     | -4.6730 | -4.9305 | -5.3140 | -5.7253 | -4.8661 | -5.1018 | 0.4191 |
| 2-Pentylfuran                                 | 19602    | -5.0310 | -4.9303 | -5.2244 | -5.2771 | -5.0127 | -5.0951 | 0.1482 |

|                                                        |         |         |         |         |         |         |         |        |
|--------------------------------------------------------|---------|---------|---------|---------|---------|---------|---------|--------|
| Naphthalene                                            | 931     | -5.0007 | -5.0522 | -5.6491 | -5.2235 | -4.5188 | -5.0888 | 0.4081 |
| 4-Vinyl guaiacol                                       | 332     | -4.6287 | -5.1831 | -5.4477 | -5.2251 | -4.9309 | -5.0831 | 0.3133 |
| Gentisic acid                                          | 3469    | -4.8036 | -4.6925 | -5.1136 | -5.1030 | -5.6952 | -5.0816 | 0.3894 |
| Scopoletin                                             | 5280460 | -4.6832 | -4.8160 | -5.3984 | -5.2053 | -5.2824 | -5.0770 | 0.3103 |
| m-Hydroxy-acetophenone                                 | 8487    | -4.7395 | -4.8035 | -5.2591 | -5.3401 | -5.1891 | -5.0663 | 0.2753 |
| 2-(1-Pentenyl)furan                                    | 5369956 | -4.7946 | -4.8292 | -5.2579 | -5.4374 | -5.0120 | -5.0662 | 0.2772 |
| 2, 6,-Nonadienal, 3, 7-dimethyl                        | 5364526 | -4.4135 | -4.8484 | -5.9227 | -5.2808 | -4.8479 | -5.0626 | 0.5703 |
| Methyl chavicol                                        | 8815    | -4.8676 | -5.2022 | -5.0431 | -5.6513 | -4.4474 | -5.0423 | 0.4418 |
| DL-a aminopimelic acid                                 | 101122  | -4.5595 | -4.5355 | -5.0472 | -5.3816 | -5.6875 | -5.0422 | 0.5053 |
| Niacinamide                                            | 936     | -4.4355 | -4.2718 | -4.8786 | -4.7152 | -6.7999 | -5.0202 | 1.0225 |
| Indole-3-carboxaldehyde                                | 10256   | -4.7967 | -5.0215 | -5.3429 | -5.2731 | -4.6393 | -5.0147 | 0.3012 |
| p-Hydroxy-acetophenone                                 | 7469    | -4.7486 | -4.8066 | -5.2590 | -5.1422 | -4.9337 | -4.9780 | 0.2179 |
| Cinnamic acid                                          | 444539  | -5.0207 | -5.1500 | -5.3667 | -5.6071 | -3.7079 | -4.9704 | 0.7401 |
| Citric acid                                            | 311     | -4.8990 | -4.4921 | -5.1548 | -5.2541 | -5.0464 | -4.9693 | 0.2976 |
| L-2-aminoadipic acid                                   | 92136   | -4.8207 | -4.4815 | -4.7437 | -5.1447 | -5.6235 | -4.9628 | 0.4386 |
| Tyrosol                                                | 10393   | -4.5520 | -4.7035 | -5.2737 | -5.0909 | -5.1181 | -4.9476 | 0.3050 |
| Nonanol                                                | 8914    | -4.7471 | -4.6630 | -5.0192 | -5.3635 | -4.8559 | -4.9297 | 0.2766 |
| Dimethyl-L-tartrate                                    | 11851   | -4.1652 | -4.5993 | -4.7369 | -5.2057 | -5.9156 | -4.9245 | 0.6669 |
| Pyrogallol                                             | 1057    | -4.3147 | -4.2788 | -4.8332 | -4.8184 | -6.3083 | -4.9107 | 0.8250 |
| 2,4,6-Trimethyl-5H-1,3,5-dithiazine                    | 12518   | -4.8606 | -4.8304 | -4.3958 | -5.4706 | -4.9039 | -4.8922 | 0.3827 |
| Resorcinol                                             | 5054    | -4.5554 | -4.4482 | -4.7618 | -4.8494 | -5.8235 | -4.8876 | 0.5470 |
| Acetophenone                                           | 7410    | -4.8719 | -4.7035 | -5.1200 | -5.0128 | -4.6494 | -4.8715 | 0.1995 |
| Succinic acid                                          | 1110    | -4.8364 | -3.8311 | -4.2310 | -4.4772 | -6.9623 | -4.8676 | 1.2268 |
| Phthalic acid                                          | 1017    | -4.6535 | -4.9183 | -4.9317 | -5.2531 | -4.5637 | -4.8641 | 0.2708 |
| 3,4-Dihydroxybenzoic acid                              | 72      | -4.8333 | -4.6672 | -5.1600 | -5.0259 | -4.5224 | -4.8418 | 0.2587 |
| Mannitol                                               | 6251    | -4.1161 | -4.4726 | -4.6281 | -5.1819 | -5.8064 | -4.8410 | 0.6623 |
| Glucosamine                                            | 439213  | -4.5563 | -4.5802 | -4.9389 | -5.0571 | -5.0481 | -4.8361 | 0.2491 |
| Nonanal                                                | 31289   | -4.8495 | -4.4232 | -4.8488 | -5.4732 | -4.5540 | -4.8297 | 0.4050 |
| 3-Octanone                                             | 246728  | -4.9014 | -4.5722 | -4.9537 | -5.1633 | -4.5566 | -4.8294 | 0.2611 |
| 4-deoxypyridoxine                                      | 6094    | -4.5434 | -4.7093 | -5.1075 | -4.9896 | -4.7304 | -4.8160 | 0.2281 |
| 2,6-Dimethoxy-hydroquinone                             | 96038   | -4.4394 | -4.7970 | -4.8829 | -5.1682 | -4.7463 | -4.8068 | 0.2623 |
| Aminobutyric acid                                      | 119     | -4.7204 | -3.6754 | -4.1091 | -4.1805 | -7.1715 | -4.7714 | 1.3921 |
| Gallic acid                                            | 370     | -4.5537 | -4.7069 | -5.1618 | -5.1571 | -4.2638 | -4.7686 | 0.3906 |
| Benzofuran, 2,3,-dihydro                               | 10329   | -4.8107 | -4.6757 | -5.1567 | -4.9077 | -4.2135 | -4.7528 | 0.3490 |
| n-Octanal                                              | 454     | -4.7856 | -4.5152 | -4.7390 | -5.1530 | -4.5432 | -4.7472 | 0.2558 |
| 5,6-Dihydro-4-pentyl- 2,6-dimethyl-4H-1,3,5-dithiazine | 528360  | -4.5530 | -4.4662 | -4.6909 | -5.1043 | -4.8001 | -4.7229 | 0.2486 |
| p-hydroxybenzoic acid                                  | 135     | -4.8171 | -4.4785 | -5.1055 | -4.9430 | -4.2409 | -4.7170 | 0.3520 |
| Benzaldehyde                                           | 240     | -4.4619 | -4.1636 | -4.7090 | -4.5944 | -5.4716 | -4.6801 | 0.4871 |
| Arabitol                                               | 94154   | -4.2416 | -4.1367 | -4.4950 | -4.4688 | -6.0119 | -4.6708 | 0.7648 |
| p-Hydroxybenzyl alcohol                                | 125     | -4.5106 | -4.4335 | -5.1881 | -4.6239 | -4.5564 | -4.6625 | 0.3019 |

|                                |          |         |         |         |         |         |         |        |
|--------------------------------|----------|---------|---------|---------|---------|---------|---------|--------|
| Leucine                        | 6106     | -4.4909 | -4.2681 | -4.7724 | -4.7699 | -4.9745 | -4.6551 | 0.2765 |
| Heptanal                       | 8130     | -4.8824 | -4.3856 | -4.4354 | -4.8045 | -4.7542 | -4.6524 | 0.2262 |
| adenine                        | 190      | -4.3196 | -4.2281 | -4.7564 | -4.4165 | -5.4622 | -4.6365 | 0.5029 |
| Rhamnose                       | 25310    | -4.4924 | -4.2429 | -5.0173 | -4.8088 | -4.6036 | -4.6330 | 0.2964 |
| Proline                        | 145742   | -4.0063 | -4.0830 | -4.4314 | -4.4834 | -6.0778 | -4.6164 | 0.8433 |
| p-Hydroxy-benzaldehyde         | 126      | -4.5205 | -4.3241 | -5.0289 | -4.6824 | -4.4840 | -4.6079 | 0.2675 |
| 2-Heptanone                    | 8051     | -4.9034 | -4.4818 | -4.5563 | -4.8214 | -4.2625 | -4.6050 | 0.2602 |
| 1,6-dioxaspiro[4.4]non-3-ene   | 10374471 | -4.2796 | -4.6823 | -4.7223 | -4.8609 | -4.3975 | -4.5885 | 0.2413 |
| Anisaldehyde                   | 31244    | -4.4606 | -4.6160 | -4.7277 | -5.1340 | -3.9139 | -4.5704 | 0.4437 |
| Levoglucozan                   | 2724705  | -4.2356 | -4.4146 | -4.8533 | -5.1606 | -4.1164 | -4.5561 | 0.4387 |
| Levulinic acid                 | 11579    | -5.0129 | -4.0932 | -4.3727 | -4.7745 | -4.3198 | -4.5146 | 0.3713 |
| 3-hydroxy-2,3 dihydromaltol    | 119838   | -4.4129 | -4.4033 | -4.5699 | -4.7173 | -4.3373 | -4.4881 | 0.1540 |
| Hexanal                        | 6184     | -4.3494 | -4.0535 | -4.1694 | -4.4552 | -5.0756 | -4.4206 | 0.3979 |
| Histidinol                     | 776      | -4.6736 | -4.0396 | -4.4760 | -4.7254 | -4.0323 | -4.3894 | 0.3358 |
| Glutaric acid                  | 743      | -4.6733 | -4.0851 | -4.3199 | -4.7147 | -4.1178 | -4.3821 | 0.2989 |
| 2-acetylpyrrole                | 14079    | -4.7035 | -4.0104 | -4.5642 | -4.5213 | -4.0851 | -4.3769 | 0.3091 |
| Galactal                       | 2734735  | -4.2527 | -4.3599 | -4.8189 | -4.9485 | -3.4751 | -4.3710 | 0.5811 |
| Creatinine                     | 588      | -4.0338 | -4.0479 | -4.3710 | -3.9831 | -5.3583 | -4.3588 | 0.5793 |
| Choline                        | 305      | -3.5379 | -3.4924 | -3.8792 | -3.7727 | -6.9193 | -4.3203 | 1.4618 |
| 2-deoxy-D-ribose               | 5460005  | -4.6597 | -3.9711 | -4.3789 | -4.5414 | -3.8302 | -4.2762 | 0.3605 |
| 1,4-benzoquinone               | 4650     | -4.1461 | -4.0304 | -4.7595 | -4.3478 | -3.9999 | -4.2567 | 0.3124 |
| L-threonine                    | 6288     | -3.9644 | -3.7595 | -4.3687 | -4.1956 | -4.6826 | -4.1942 | 0.3574 |
| 6-azacytosine                  | 70265    | -4.3448 | -4.0075 | -4.4565 | -4.1012 | -3.9823 | -4.1784 | 0.2114 |
| 1, 2, 3-Butanetriol            | 20497    | -3.9823 | -3.5833 | -4.2596 | -4.1378 | -3.8406 | -3.9607 | 0.2636 |
| 3,5-Dimethyl-1,2,4-trithiolane | 32033    | -3.8039 | -3.6558 | -4.0430 | -4.0930 | -3.5953 | -3.8382 | 0.2238 |
| Formic acid                    | 284      | -2.8025 | -2.7363 | -2.8215 | -3.0033 | -5.2045 | -3.3136 | 1.0617 |

**Table S12.** Main values from the HR1 per-residue decomposition of the free energy. The values are in kcal/mol. The cutoff point was -0.5 kcal/mol.

| Residue | Alpha-tocotrienol | Amentoflavone | Isorhamnetin 3-O-rutinoside |
|---------|-------------------|---------------|-----------------------------|
| Thr112  |                   | -0.557        |                             |
| Phe116  | -1.316            |               |                             |
| Phe119  | -1.193            |               |                             |
| Ala151  | -0.582            |               |                             |
| Leu154  | -2.204            |               |                             |
| Leu157  | -1.712            | -2.233        |                             |
| Trp158  | -0.882            | -2.946        |                             |
| Ile160  |                   | -1.861        | -1.997                      |



|        |        |        |
|--------|--------|--------|
| Pro161 | -2.511 | -2.073 |
| Gly164 |        | -0.648 |
| His167 | -0.778 | -4.335 |
| Phe168 | -0.627 | -2.201 |
| Gln170 |        | -1.552 |
| Gln171 |        | -1.107 |
| Trp189 |        | -1.065 |
| Phe190 | -3.099 | -1.101 |
| Met193 | -1.302 | -0.584 |
| Thr194 | -1.018 | -0.506 |
| Ile197 | -2.855 | -1.315 |
| Asn198 | -0.838 | -1.538 |
| Leu201 | -1.142 |        |
| Pro202 | -1.031 |        |

**Table S13.** Main values from the NKR1 per-residue decomposition of the free energy. The values are in kcal/mol. The cutoff point was -0.5 kcal/mol.

| Residue | Alpha-tocotrienol | Amentoflavone | Isorhamnetin 3-O-rutinoside | Neoxanthin | Aprepitant |
|---------|-------------------|---------------|-----------------------------|------------|------------|
| Val26   |                   |               |                             | -1.432     |            |
| Gln27   |                   |               |                             | -0.629     |            |
| Asn89   |                   |               | -4.12                       |            |            |
| Tyr92   | -1.119            | -0.892        | -1.616                      | -0.732     |            |
| Ala93   |                   | -0.678        | -0.879                      | -0.904     |            |
| Val94   |                   |               |                             | -0.736     |            |
| Asn96   |                   |               |                             | -0.673     |            |
| His108  |                   | -0.539        | -1.257                      |            | -0.532     |
| Asn109  |                   | -0.64         | -2.32                       | -0.904     | -0.94      |
| Pro112  | -1.147            | -0.681        | -0.713                      | -0.618     | -0.555     |
| Ile113  | -1.349            | -0.603        | -1.108                      |            | -1.574     |
| Val116  | -0.63             |               |                             | -0.781     |            |
| Gln165  |                   | -0.854        | -0.965                      |            | -2.474     |
| Ser169  |                   |               | -0.733                      |            |            |
| Val179  | -0.719            |               |                             |            |            |
| Cys180  |                   |               | -0.586                      |            |            |

|        |        |        |        |        |        |
|--------|--------|--------|--------|--------|--------|
| Met181 | -0.805 |        | -2.462 |        |        |
| Ile182 | -0.949 | -1.531 | -2.351 | -0.58  | -1.362 |
| Trp184 |        |        |        |        | -0.839 |
| Tyr196 |        |        |        |        | -0.835 |
| His197 |        |        | -0.592 |        | -1.753 |
| Val200 |        |        |        |        | -0.733 |
| Phe264 | -0.644 |        | -0.736 |        |        |
| His265 | -1.134 |        | -1.963 |        |        |
| Phe267 | -0.533 | -2.525 | -0.848 | -0.872 |        |
| Phe268 | -2.013 | -4.613 | -4.755 | -1.711 | -2.097 |
| Leu270 |        | -0.708 |        |        |        |
| Leu279 | -0.711 |        |        |        |        |
| Phe282 |        |        |        | -0.831 |        |
| Ile283 |        | -1.359 | -0.674 | -1.451 |        |
| Gln284 | -0.577 | -1.132 |        | -1.783 |        |
| Tyr287 | -0.715 | -2.297 | -1.027 | -1.082 |        |

**Table S14.** Main values from the CLR1 per-residue decomposition of the free energy. The values are in kcal/mol. The cutoff point was -0.5 kcal/mol.

| Residue | Alpha-tocotrienol | Amentoflavone | Isorhamnetin 3-O-rutinoside | Neoxanthin | Zafirlukast |
|---------|-------------------|---------------|-----------------------------|------------|-------------|
| Arg97   |                   |               |                             | -0.709     |             |
| Thr100  |                   | -0.965        |                             | -1.408     | -0.858      |
| Tyr101  |                   |               |                             | -0.876     |             |
| Leu103  |                   | -0.639        |                             | -1.299     |             |
| Tyr104  | -1.047            | -0.849        |                             |            |             |
| Val105  | -0.52             |               |                             |            |             |
| Tyr108  | -1.123            |               |                             |            | -1.278      |
| Phe112  |                   |               |                             | -2.052     |             |
| Thr115  |                   |               |                             | -1.196     |             |
| Ile147  |                   |               |                             | -1.338     |             |
| Ile149  |                   |               | -0.627                      |            |             |
| Phe150  |                   |               | -1.375                      | -1.694     |             |
| Val151  | -1.038            |               |                             | -0.763     |             |
| Leu153  |                   |               | -1.515                      |            |             |
| Thr154  | -0.531            |               | -1.535                      | -0.969     |             |

|        |        |        |        |        |        |
|--------|--------|--------|--------|--------|--------|
| Pro157 |        |        | -0.656 |        | -1.211 |
| Phe158 | -0.724 | -1.576 | -0.937 | -1.836 | -2.324 |
| Ala161 |        |        |        |        | -0.936 |
| Pro163 |        |        |        | -1.498 |        |
| Cys173 |        |        |        | -1.238 |        |
| Phe174 |        | -1.834 |        | -1.383 | -1.45  |
| Glu175 |        | -1.335 |        | -1.224 |        |
| Pro176 | -2.329 | -3.254 | -0.945 | -1.755 | -1.585 |
| Pro177 | -1.691 | -2.728 | -0.519 | -0.506 | -1.241 |
| Val186 | -1.301 | -1.399 | -0.762 |        | -1.012 |
| Leu189 | -2.411 | -1.955 | -2.241 | -0.753 | -2.908 |
| His190 | -0.702 | -0.613 | -0.643 |        | -1.134 |
| Val192 | -1.226 |        | -1.196 | -0.7   | -0.505 |
| Ser193 | -1.301 |        | -0.718 | -0.579 | -1.399 |
| Val196 | -0.866 |        |        | -1.504 | -0.569 |
| Ile200 |        |        |        | -0.736 |        |
| Pro201 |        |        |        | -0.984 |        |
| Ile204 |        |        |        | -0.548 |        |
| Arg253 | -1.689 | -1.855 | -1.437 |        | -2.179 |
| His256 | -0.98  | -1.85  | -0.846 |        |        |
| Leu257 | -1.021 | -1.317 | -1.421 |        | -0.682 |
| Leu260 | -0.731 |        | -0.6   |        |        |

**Table S15.** Main values from the CRTH2 per-residue decomposition of the free energy. The values are in kcal/mol. The cutoff point was -0.5 kcal/mol.

| Residue | Alpha-tocotrienol | Amentoflavone | Isorhamnetin 3-O-rutinoside | Neoxanthin | Fevipirant |
|---------|-------------------|---------------|-----------------------------|------------|------------|
| Leu20   |                   |               | -0.527                      |            |            |
| Phe87   | -0.653            | -2.806        | -1.332                      | -0.644     | -1.212     |
| Thr88   | -0.648            | -0.648        |                             |            |            |
| Phe90   | -1.751            | -2.45         | -3.365                      | -2.04      | -0.743     |
| Leu91   |                   | -0.948        | -1.045                      |            |            |
| His95   | -0.67             |               |                             | -1.77      |            |
| Trp97   | -0.707            | -0.867        |                             |            |            |

|        |        |        |        |        |        |
|--------|--------|--------|--------|--------|--------|
| His107 | -0.677 | -0.785 |        | -0.844 |        |
| Ser108 | -0.708 |        |        |        | -0.542 |
| Phe111 | -0.885 |        |        | -1.028 | -1.266 |
| Phe112 |        |        |        |        | -0.524 |
| Arg170 | -1.99  | -1.238 | -0.58  | -1.093 | -9.101 |
| Met181 | -1.334 | -2.875 | -1.926 | -1.298 | -0.664 |
| Cys182 | -0.969 | -2.496 | -1.135 |        |        |
| Tyr183 | -0.596 | -1.147 | -1.592 |        | -0.763 |
| Tyr184 |        | -0.574 | -0.506 |        | -1.439 |
| Lys210 |        | -1.071 | -3.566 | -1.703 | -6.742 |
| Tyr262 |        |        |        | -0.832 | -1.182 |
| Glu269 |        | -0.899 |        |        |        |
| Val282 |        |        | -0.948 |        |        |
| Trp283 |        | -0.806 | -3.176 |        |        |
| Arg284 |        |        | -0.802 | -0.713 |        |
| Leu286 | -1.036 | -2.707 | -2.237 | -1.775 | -3.188 |
| Pro287 | -2.752 | -1.977 | -3.249 | -2.414 | -1.168 |
| Phe288 | -0.728 |        |        | -0.512 |        |
| Thr290 | -1.727 | -1.034 |        | -1.603 | -1.5   |
| Phe294 | -0.753 |        |        |        | -0.586 |

**Table S16.** Main values from the BK2R per-residue decomposition of the free energy. The values are in kcal/mol. The cutoff point was -0.5 kcal/mol.

| Residue | Alpha-tocotrienol | Amentoflavone | Isorhamnetin 3-O-rutinoside | Neoxanthin | JSM-10292 |
|---------|-------------------|---------------|-----------------------------|------------|-----------|
| Gln49   |                   | -0.746        |                             |            |           |
| Leu110  |                   | -0.627        |                             |            |           |
| Trp113  | -1.69             | -3.607        | -1.025                      | -1.758     | -2.127    |
| Thr116  |                   |               | -0.503                      |            | -0.622    |
| Ile117  | -0.632            | -0.687        |                             |            | -0.895    |
| Phe121  | -0.688            | -2.964        |                             |            | -2.388    |
| Trp123  |                   |               | -0.54                       |            |           |
| Asn134  |                   |               | -0.989                      |            |           |
| Ile137  | -1.309            | -1.532        | -0.741                      | -1.542     | -1.013    |

|        |        |        |        |        |        |
|--------|--------|--------|--------|--------|--------|
| Ser138 | -0.83  |        | -0.739 | -1.193 | -0.634 |
| Leu141 | -0.708 |        |        | -1.031 |        |
| Met192 | -0.685 |        | -1.87  | -0.848 | -0.518 |
| Arg196 |        |        | -3.251 |        |        |
| Tyr201 |        |        |        | -1.257 |        |
| Ala210 |        | -0.884 |        |        |        |
| Cys211 |        |        | -1.029 |        |        |
| Val212 |        |        |        | -1.988 |        |
| Ile213 | -0.703 |        |        | -0.9   |        |
| Ser214 |        |        |        | -0.609 |        |
| Tyr215 |        |        |        | -1.218 |        |
| Leu218 |        |        |        | -0.698 |        |
| Glu221 |        |        | -1.74  |        |        |
| Thr224 |        |        | -2.127 |        |        |
| Asn225 |        |        | -0.69  |        |        |
| Leu228 | -0.647 |        | -0.831 |        | -0.812 |
| Phe286 | -1.247 | -0.753 | -0.509 |        | -0.781 |
| Thr290 | -0.505 |        |        |        |        |
| Arg297 |        |        | -0.897 |        |        |
| Asp311 |        | -1.85  |        |        |        |
| Thr314 | -1.126 | -1.33  | -3.256 |        | -0.722 |
| Gln315 | -2.369 | -2.222 | -1.772 |        | -1.944 |
| Ser318 |        | -2.027 |        | -1.097 | -0.843 |
| Phe319 | -0.873 |        |        |        | -0.502 |
| Tyr322 | -0.614 |        |        | -1.006 |        |

**Table S17.** UD's Phytochemical Database.

| Molecule                  | PubChem CID | Phytochemical Screening                           |
|---------------------------|-------------|---------------------------------------------------|
| 3,4-Dihydroxybenzoic acid | 72          | [Repajić, et al., 2021]                           |
| Aminobutyric acid         | 119         | [Roschek Jr., et al., 2009]                       |
| p-Hydroxybenzyl alcohol   | 125         | [Grauso, et al., 2020] [Majedi, et al., 2021]     |
| p-Hydroxy-benzaldehyde    | 126         | [Grauso, et al., 2020]                            |
| p-hydroxybenzoic acid     | 135         | [Repajić, et al., 2021] [Grauso, et al., 2020]    |
| adenine                   | 190         | [Roschek Jr., et al., 2009] [Ayers, et al., 2008] |

|                                       |      |                                                                                              |
|---------------------------------------|------|----------------------------------------------------------------------------------------------|
| Benzaldehyde                          | 240  | [Ilies, et al., 2012]                                                                        |
| Formic acid                           | 284  | [Grauso, et al., 2020; Grauso et al., 2019]                                                  |
| Choline                               | 305  | [Grauso, et al., 2020] [Grauso, et al., 2019]                                                |
| Citric acid                           | 311  | [Grauso, et al., 2019] [Grauso, et al., 2020]                                                |
| Cumin aldehyde                        | 326  | [Gül, et al., 2012] [Grauso, et al., 2020]                                                   |
| 4-Vinyl guaiacol                      | 332  | [Gül, et al., 2012]                                                                          |
| Gallic acid                           | 370  | [Repajić, et al., 2021] [Grauso, et al., 2020]                                               |
| n-Octanal                             | 454  | [Ilies, et al., 2012]                                                                        |
| Creatinine                            | 588  | [Roschek Jr., et al., 2009]                                                                  |
| Glutaric acid                         | 743  | [Roschek Jr., et al., 2009]                                                                  |
| Histidinol                            | 776  | [Roschek Jr., et al., 2009]                                                                  |
| Indole                                | 798  | [Roschek Jr., et al., 2009]                                                                  |
| Naphthalene                           | 931  | [Gül, et al., 2012] [Grauso, et al., 2020]                                                   |
| Naringenin                            | 932  | [Repajić, et al., 2021]                                                                      |
| Niacinamide                           | 936  | [Roschek Jr., et al., 2009]                                                                  |
| Palmitic acid                         | 985  | [Grauso, et al., 2020]                                                                       |
| Phthalic acid                         | 1017 | [Majedi, et al., 2021]                                                                       |
| Pyrogallol                            | 1057 | [Roschek Jr., et al., 2009] [Ayers, et al., 2008]                                            |
| Succinic acid                         | 1110 | [Grauso, et al., 2020] [Grauso, et al., 2019]                                                |
| 9-Hydroxy-10,12- octadecadienoic acid | 1927 | [Grauso, et al., 2020]                                                                       |
| DL-methyl-m-tyrosine                  | 2110 | [Ayers, et al., 2008]                                                                        |
| 4-aminoantipyrine                     | 2151 | [Roschek Jr., et al., 2009]                                                                  |
| Camphor                               | 2537 | [Ilies, et al., 2012]                                                                        |
| Dibutyl phthalate                     | 3026 | [Majedi, et al., 2021]                                                                       |
| Eugenol                               | 3314 | [Gül, et al., 2012] [Roschek Jr., et al., 2009]                                              |
| Gentisic acid                         | 3469 | [Repajić, et al., 2021] [Grauso, et al., 2020]                                               |
| Hydrocotarnine                        | 3646 | [Roschek Jr., et al., 2009]                                                                  |
| Lauric acid                           | 3893 | [Grauso, et al., 2020]                                                                       |
| 1,4-benzoquinone                      | 4650 | [Roschek Jr., et al., 2009]                                                                  |
| Resorcinol                            | 5054 | [Roschek Jr., et al., 2009]                                                                  |
| Salicylic alcohol                     | 5146 | [Grauso, et al., 2020]                                                                       |
| 4-deoxypyridoxine                     | 6094 | [Roschek Jr., et al., 2009]                                                                  |
| Leucine                               | 6106 | [Roschek Jr., et al., 2009]                                                                  |
| Phenylalanine                         | 6140 | [Roschek Jr., et al., 2009]                                                                  |
| Hexanal                               | 6184 | [Gül, et al., 2012] [Grauso, et al., 2020]                                                   |
| Mannitol                              | 6251 | [Roschek Jr., et al., 2009]                                                                  |
| L-threonine                           | 6288 | [Roschek Jr., et al., 2009]                                                                  |
| Bornyl acetate                        | 6448 | [Ilies, et al., 2012]                                                                        |
| Quinic acid                           | 6508 | [Repajić, et al., 2021] [Garcia, et al., 2021] [Grauso, et al., 2020] [Grauso, et al., 2019] |
| Linalool                              | 6549 | [Gül, et al., 2012] [Grauso, et al., 2020]                                                   |

|                                     |       |                                                                           |
|-------------------------------------|-------|---------------------------------------------------------------------------|
| Vitamin B5                          | 6613  | [Roschek Jr., et al., 2009] [Ayers, et al.,2008]                          |
| Thymol                              | 6989  | [Ilies, et al., 2012] [Gül, et al., 2012]                                 |
| 1-Methyl naphthalene                | 7002  | [Gül, et al., 2012]                                                       |
| Diphenyl                            | 7095  | [Roschek Jr., et al., 2009]                                               |
| Methyl eugenol                      | 7127  | [Gül, et al., 2012]                                                       |
| Synephrine                          | 7172  | [Roschek Jr., et al., 2009] [Ayers, et al.,2008]                          |
| Carvylacetate                       | 7335  | [Roschek Jr., et al., 2009]                                               |
| Acetophenone                        | 7410  | [Roschek Jr., et al., 2009]                                               |
| Carvone                             | 7439  | [Gül, et al., 2012] [Grauso, et al., 2020]                                |
| p-Cymene                            | 7463  | [Gül, et al., 2012] [Grauso, et al., 2020]                                |
| p-Hydroxy-acetophenone              | 7469  | [Grauso, et al., 2020]                                                    |
| 2-Heptanone                         | 8051  | [Gül, et al., 2012] [Grauso, et al., 2020]                                |
| Heptanal                            | 8130  | [Gül, et al., 2012] [Grauso, et al., 2020]                                |
| 1-Dodecanamine, N, N-dimethyl       | 8168  | [Al-Tameme, et al., 2015] [Majedi, et al., 2021]                          |
| Decanal                             | 8175  | [Ilies, et al., 2012]                                                     |
| Methyl palmitate                    | 8181  | [Ilies, et al., 2012] [Grauso, et al., 2020]                              |
| Benzyl salicilate                   | 8363  | [Grauso, et al., 2020]                                                    |
| Vanillic acid                       | 8468  | [Grauso, et al., 2020]                                                    |
| m-Hydroxy-acetophenone              | 8487  | [Grauso, et al., 2020]                                                    |
| Anthranilic acid methyl ester       | 8635  | [Roschek Jr., et al., 2009]                                               |
| Shikimic acid                       | 8742  | [Roschek Jr., et al., 2009] [Grauso, et al., 2020] [Grauso, et al., 2019] |
| Methyl chavicol                     | 8815  | [Gül, et al., 2012]                                                       |
| Nonanol                             | 8914  | [Roschek Jr., et al., 2009]                                               |
| Catechin                            | 9064  | [Repajić, et al., 2021] [Grauso, et al., 2020]                            |
| β-Cyclocitral                       | 9895  | [Ilies, et al., 2012] [Gül, et al., 2012]                                 |
| Osthole                             | 10228 | [Roschek Jr., et al., 2009] [Ayers, et al.,2008]                          |
| Indole-3-carboxaldehyde             | 10256 | [Grauso, et al., 2020]                                                    |
| Benzofuran, 2,3,-dihydro            | 10329 | [Al-Tameme, et al., 2015] [Majedi, et al., 2021]                          |
| Carvacrol                           | 10364 | [Ilies, et al., 2012] [Gül, et al., 2012] [Grauso, et al., 2020]          |
| Tyrosol                             | 10393 | [Roschek Jr., et al., 2009] [Grauso, et al., 2020]                        |
| Hexahydrofarnesylacetone            | 10408 | [Ilies, et al., 2012] [Gül, et al., 2012] [Grauso, et al., 2020]          |
| Neophytadiene                       | 10446 | [Grauso, et al., 2020] [Majedi, et al., 2021]                             |
| Heptadecanoic acid                  | 10465 | [Grauso, et al., 2020]                                                    |
| Flavone                             | 10680 | [Majedi, et al., 2021]                                                    |
| Syringic acid                       | 10742 | [Repajić, et al., 2021] [Grauso, et al., 2020]                            |
| Myristic acid                       | 11005 | [Grauso, et al., 2020]                                                    |
| Levulinic acid                      | 11579 | [Roschek Jr., et al., 2009]                                               |
| Dimethyl-L-tartrate                 | 11851 | [Roschek Jr., et al., 2009]                                               |
| 2,4,6-Trimethyl-5H-1,3,5-dithiazine | 12518 | [Ilies, et al., 2012]                                                     |
| Decan-2-one                         | 12741 | [Ilies, et al., 2012]                                                     |

|                                  |       |                                                                  |
|----------------------------------|-------|------------------------------------------------------------------|
| 2-acetylpyrrole                  | 14079 | [Roschek Jr., et al., 2009]                                      |
| Homovanillyl alcohol             | 16928 | [Grauso, et al., 2020]                                           |
| $\alpha$ - Terpineol             | 17100 | [Gül, et al., 2012] [Grauso, et al., 2020]                       |
| Methylcoumarin                   | 17130 | [Roschek Jr., et al., 2009]                                      |
| 6-aminochrysene                  | 17534 | [Roschek Jr., et al., 2009]                                      |
| 2-Pentylfuran                    | 19602 | [Ilies, et al., 2012] [Gül, et al., 2012] [Grauso, et al., 2020] |
| $\alpha$ -Copaene                | 19725 | [Grauso, et al., 2020]                                           |
| 1, 2, 3-Butanetriol              | 20497 | [Al-Tameme, et al., 2015] [Majedi, et al., 2021]                 |
| Isopropyl dodecanoate            | 25068 | [Ilies, et al., 2012]                                            |
| Rhamnose                         | 25310 | [Grauso, et al., 2020]                                           |
| Anisaldehyde                     | 31244 | [Roschek Jr., et al., 2009]                                      |
| Nonanal                          | 31289 | [Ilies, et al., 2012] [Gül, et al., 2012] [Grauso, et al., 2020] |
| 3,5-Dimethyl-1,2,4-trithiolane   | 32033 | [Ilies, et al., 2012]                                            |
| Adenosine                        | 60961 | [Roschek Jr., et al., 2009]                                      |
| Safranal                         | 61041 | [Ilies, et al., 2012]                                            |
| $\beta$ -Homocyclocitral         | 61124 | [Ilies, et al., 2012]                                            |
| 6-benzylaminopurine              | 62389 | [Roschek Jr., et al., 2009]                                      |
| $\beta$ -Bourbonene              | 62566 | [Grauso, et al., 2020] [Gül, et al., 2012]                       |
| Borneol                          | 64685 | [Ilies, et al., 2012] [Gül, et al., 2012]                        |
| Apoatropine                      | 64695 | [Ilies, et al., 2012]                                            |
| Ursolic acid                     | 64945 | [Majedi, et al., 2021]                                           |
| Epigallocatechin gallate         | 65064 | [Repajić, et al., 2021]                                          |
| Secoisolariciresinol             | 65373 | [Grauso, et al., 2020]                                           |
| Solanidine                       | 65727 | [Roschek Jr., et al., 2009]                                      |
| 4-methyl-7-ethoxycoumarin        | 66595 | [Roschek Jr., et al., 2009]                                      |
| Harmol                           | 68094 | [Roschek Jr., et al., 2009]                                      |
| 4-Acetyl-2-methylphenol          | 70135 | [Grauso, et al., 2020]                                           |
| 6-azacytosine                    | 70265 | [Roschek Jr., et al., 2009]                                      |
| Epicatechin                      | 72276 | [Repajić, et al., 2021] [Grauso, et al., 2020]                   |
| Isopilosine                      | 72312 | [Roschek Jr., et al., 2009]                                      |
| 9-amino-camptothecin             | 72402 | [Roschek Jr., et al., 2009]                                      |
| Carvacryl acetate                | 80792 | [Roschek Jr., et al., 2009]                                      |
| 1,2-O-isopropylidene-D-glucoside | 87704 | [Roschek Jr., et al., 2009]                                      |
| 1,2-Benzenedicarboxylic acid     | 90531 | [Majedi, et al., 2021]                                           |
| Hecogenin                        | 91453 | [Roschek Jr., et al., 2009]                                      |
| L-2-aminoadipic acid             | 92136 | [Roschek Jr., et al., 2009]                                      |
| $\alpha$ -Curcumene              | 92139 | [Gül, et al., 2012]                                              |
| $\gamma$ -Cadinene               | 92313 | [Ilies, et al., 2012] [Gül, et al., 2012] [Grauso, et al., 2020] |
| Podocarpic acid                  | 93017 | [Roschek Jr., et al., 2009]                                      |
| Arabitol                         | 94154 | [Roschek Jr., et al., 2009]                                      |



|                                                             |        |                                                                                                                          |
|-------------------------------------------------------------|--------|--------------------------------------------------------------------------------------------------------------------------|
| Flavan                                                      | 94156  | [Roschek Jr., et al., 2009]                                                                                              |
| 2,6-Dimethoxy-hydroquinone                                  | 96038  | [Grauso, et al., 2020]                                                                                                   |
| DL-a aminopimelic acid                                      | 101122 | [Roschek Jr., et al., 2009]                                                                                              |
| Epicatechin gallate                                         | 107905 | [Repajić, et al., 2021]                                                                                                  |
| Catechin hydrate                                            | 107957 | [Grauso, et al., 2020]                                                                                                   |
| $\alpha$ - Terpinyl acetate                                 | 111037 | [Gül, et al., 2012]                                                                                                      |
| 3-hydroxy-2,3 dihydromaltol                                 | 119838 | [Roschek Jr., et al., 2009]                                                                                              |
| Proline                                                     | 145742 | [Roschek Jr., et al., 2009]                                                                                              |
| Anthocyanins                                                | 145858 | [Majedi, et al., 2021]                                                                                                   |
| Isolariciresinol                                            | 160521 | [Grauso, et al., 2020]                                                                                                   |
| 7 $\alpha$ -Hydroxy sitosterol                              | 161816 | [Grauso, et al., 2020]                                                                                                   |
| n-acetyl-L-glutamine                                        | 182230 | [Roschek Jr., et al., 2009]                                                                                              |
| Beta-Sitosterol                                             | 222284 | [Majedi, et al., 2021]                                                                                                   |
| 4-methylmethoxycoumarin                                     | 223821 | [Roschek Jr., et al., 2009]                                                                                              |
| 3-Octanone                                                  | 246728 | [Ilies, et al., 2012]                                                                                                    |
| Deoxyharringtonine                                          | 285342 | [Roschek Jr., et al., 2009]                                                                                              |
| Convolvamine                                                | 420422 | [Roschek Jr., et al., 2009]                                                                                              |
| Glucosamine                                                 | 439213 | [Roschek Jr., et al., 2009]                                                                                              |
| Carnosine                                                   | 439224 | [Roschek Jr., et al., 2009]                                                                                              |
| Arbutine                                                    | 440936 | [Grauso, et al., 2020]                                                                                                   |
| $\delta$ -Cadinene                                          | 441005 | [Ilies, et al., 2012] [Gül, et al., 2012] [Grauso, et al., 2020]                                                         |
| Lotaustralin                                                | 441467 | [Roschek Jr., et al., 2009]                                                                                              |
| Carnosol                                                    | 442009 | [Roschek Jr., et al., 2009]                                                                                              |
| Pukateine                                                   | 442340 | [Roschek Jr., et al., 2009]                                                                                              |
| $\alpha$ -Copaene                                           | 442355 | [Gül, et al., 2012]                                                                                                      |
| $\beta$ -Selinene                                           | 442393 | [Ilies, et al., 2012]                                                                                                    |
| Cinnamic acid                                               | 444539 | [Repajić, et al., 2021]                                                                                                  |
| Arachidonic acid                                            | 444899 | [Grauso, et al., 2020]                                                                                                   |
| Farnesol                                                    | 445070 | [Ilies, et al., 2012]                                                                                                    |
| Palmitoleic acid                                            | 445638 | [Grauso, et al., 2020]                                                                                                   |
| Ferulic acid                                                | 445858 | [Repajić, et al., 2021] [Garcia, et al., 2021] [Roschek Jr., et al., 2009] [Grauso, et al., 2020] [Majedi, et al., 2021] |
| Violaxanthin                                                | 448438 | [Grauso, et al., 2020]                                                                                                   |
| $\gamma$ -sitosterol                                        | 457801 | [Grauso, et al., 2020]                                                                                                   |
| Silane, triethyl(2phenylethoxy)                             | 518978 | [Majedi, et al., 2021]                                                                                                   |
| $\beta$ - Sesquiphellandrene                                | 519764 | [Gül, et al., 2012]                                                                                                      |
| $\alpha$ -Longipinene                                       | 520957 | [Ilies, et al., 2012]                                                                                                    |
| 5,6-Dihydro-4-pentyl- 2,6-dimethyl-4H-1,3,5-dithiazine      | 528360 | [Ilies, et al., 2012]                                                                                                    |
| 2(3H)-Naphthalenone, 4, 4a,5,6,7,8-hexahydro-1-methoxy      | 534313 | [Al-Tameme, et al., 2015] [Majedi, et al., 2021]                                                                         |
| 4-(4-Hydroxy-2,6,6-trimethyl1-cyclohexen-1-yl)-3-buten2-one | 538953 | [Grauso, et al., 2020]                                                                                                   |

|                                                                       |         |                                                                                                                      |
|-----------------------------------------------------------------------|---------|----------------------------------------------------------------------------------------------------------------------|
| 2H-Indeno[1,2-b]furan-2-one, 3,3a,4,5,6,7,8,8b-octahydro-8,8-dimethyl | 605626  | [Majedi, et al., 2021]                                                                                               |
| Silane, triethyl(2-phenylethoxy)                                      | 610043  | [Al-Tameme, et al., 2015]                                                                                            |
| p-coumaric acid                                                       | 637542  | [Repajić, et al., 2021] [Pinelli, et al., 2008] [Grauso, et al., 2020]                                               |
| (E)-Anethole                                                          | 637563  | [Gül, et al., 2012] [Grauso, et al., 2020]                                                                           |
| Sinapic acid                                                          | 637775  | [Repajić, et al., 2021] [Grauso, et al., 2020]                                                                       |
| $\beta$ -Ionone                                                       | 638014  | [Ilies, et al., 2012] [Gül, et al., 2012] [Grauso, et al., 2020]                                                     |
| Piperine                                                              | 638024  | [Roschek Jr., et al., 2009]                                                                                          |
| Isopropyl- $\beta$ -D-thio-galactopyranoside                          | 656894  | [Roschek Jr., et al., 2009]                                                                                          |
| Caffeic acid                                                          | 689043  | [Garcia, et al., 2021] [Repajić, et al., 2021] [Grauso, et al., 2020]                                                |
| Coniferol                                                             | 1549095 | [Grauso, et al., 2020] [Roschek Jr., et al., 2009]                                                                   |
| Geranyl acetone                                                       | 1549778 | [Ilies, et al., 2012]                                                                                                |
| Farnesylacetone                                                       | 1711945 | [Ilies, et al., 2012] [Gül, et al., 2012]                                                                            |
| (E)-Geranyl acetone                                                   | 1713001 | [Gül, et al., 2012] [Grauso, et al., 2020]                                                                           |
| Caryophyllene oxide                                                   | 1742210 | [Gül, et al., 2012]                                                                                                  |
| Chlorogenic acid                                                      | 1794427 | [Repajić, et al., 2021] [Pinelli, et al., 2008] [Grauso, et al., 2020] [Majedi, et al., 2021] [Grauso, et al., 2019] |
| Levogluconan                                                          | 2724705 | [Roschek Jr., et al., 2009]                                                                                          |
| Galactal                                                              | 2734735 | [Roschek Jr., et al., 2009]                                                                                          |
| Cinnamide                                                             | 5273472 | [Roschek Jr., et al., 2009]                                                                                          |
| Quercetin                                                             | 5280343 | [Repajić, et al., 2021] [Grauso, et al., 2020] [Majedi, et al., 2021]                                                |
| Phytol                                                                | 5280435 | [Ilies, et al., 2012] [Gül, et al., 2012] [Grauso, et al., 2020]                                                     |
| Apigenin                                                              | 5280443 | [Repajić, et al., 2021]                                                                                              |
| Luteolin                                                              | 5280445 | [Repajić, et al., 2021] [Grauso, et al., 2019]                                                                       |
| Quercitrin                                                            | 5280459 | [Grauso, et al., 2020]                                                                                               |
| Scopoletin                                                            | 5280460 | [Repajić, et al., 2021] [Grauso, et al., 2020] [Majedi, et al., 2021]                                                |
| $\beta$ -carotene                                                     | 5280489 | [Grauso, et al., 2020]                                                                                               |
| Sinapyl alcohol                                                       | 5280507 | [Grauso, et al., 2020]                                                                                               |
| Neochlorogenic acid                                                   | 5280633 | [Grauso, et al., 2020] [Grauso, et al., 2019]                                                                        |
| 4-(3-Hydroxy-1-butyn-1-yl)- 3,5,5-trimethyl-2- cyclohexen-1-ol        | 5280654 | [Grauso, et al., 2020]                                                                                               |
| Crysoeriol                                                            | 5280666 | [Grauso, et al., 2020]                                                                                               |
| Cholecalciferol                                                       | 5280795 | [Roschek Jr., et al., 2009]                                                                                          |
| Quercetin-3-glucoside                                                 | 5280804 | [Repajić, et al., 2021] [Pinelli, et al., 2008] [Garcia, et al., 2021]                                               |
| Rutin                                                                 | 5280805 | [Repajić, et al., 2021] [Pinelli, et al., 2008] [Garcia, et al., 2021] [Majedi, et al., 2021]                        |
| Kaempferol                                                            | 5280863 | [Repajić, et al., 2021] [Grauso, et al., 2020]                                                                       |
| Linolenic acid                                                        | 5280934 | [Roschek Jr., et al., 2009] [Grauso, et al., 2020]                                                                   |
| Harmine                                                               | 5280953 | [Roschek Jr., et al., 2009]                                                                                          |
| Genistein                                                             | 5280961 | [Repajić, et al., 2021]                                                                                              |
| Myristoleic acid                                                      | 5281119 | [Grauso, et al., 2020]                                                                                               |

|                                           |         |                                                                                              |
|-------------------------------------------|---------|----------------------------------------------------------------------------------------------|
| Lutein                                    | 5281243 | [Grauso, et al., 2020]                                                                       |
| Esculetin                                 | 5281416 | [Repajić, et al., 2021] [Grauso, et al., 2020]                                               |
| Umbelliferone                             | 5281426 | [Repajić, et al., 2021]                                                                      |
| $\beta$ -Caryophyllene                    | 5281515 | [Ilies, et al., 2012] [Grauso, et al., 2020] [Gül, et al., 2012]                             |
| $\alpha$ -Humulene                        | 5281520 | [Ilies, et al., 2012]                                                                        |
| Kavain                                    | 5281565 | [Roschek Jr., et al., 2009]                                                                  |
| Amentoflavone                             | 5281600 | [Grauso, et al., 2020]                                                                       |
| Isorhamnetin                              | 5281654 | [Repajić, et al., 2021] [Grauso, et al., 2020]                                               |
| Myricetin                                 | 5281672 | [Repajić, et al., 2021]                                                                      |
| Pterostilbene                             | 5281727 | [Roschek Jr., et al., 2009]                                                                  |
| Integerrimine                             | 5281733 | [Roschek Jr., et al., 2009]                                                                  |
| Kaempferol-3-O-glucoside                  | 5282102 | [Grauso, et al., 2020]                                                                       |
| $\alpha$ -Ionone                          | 5282108 | [Ilies, et al., 2012]                                                                        |
| Cinnamyl acetate                          | 5282110 | [Roschek Jr., et al., 2009]                                                                  |
| Neoxanthin                                | 5282217 | [Grauso, et al., 2020]                                                                       |
| Alpha-tocotrienol                         | 5282347 | [Roschek Jr., et al., 2009]                                                                  |
| Homatropine                               | 5282593 | [Roschek Jr., et al., 2009]                                                                  |
| Dodecendioic acid                         | 5283028 | [Grauso, et al., 2020]                                                                       |
| cis-10-Heptadecenoic acid                 | 5312435 | [Grauso, et al., 2020]                                                                       |
| Eleutheroside B                           | 5316860 | [Roschek Jr., et al., 2009]                                                                  |
| 10-gingerdione                            | 5317591 | [Roschek Jr., et al., 2009]                                                                  |
| Isorhamnetin-3-O-glucoside                | 5318645 | [Grauso, et al., 2020]                                                                       |
| Kaempferol-3-rutinoside                   | 5318767 | [Repajić, et al., 2021] [Pinelli, et al., 2008] [Grauso, et al., 2020]                       |
| Quercetin dihexoside                      | 5320835 | [Grauso, et al., 2020]                                                                       |
| 3,4-dimethoxychalcone                     | 5354494 | [Roschek Jr., et al., 2009]                                                                  |
| 2, 6,-Nonadienal, 3, 7-dimethyl           | 5364526 | [Al-Tameme, et al., 2015] [Majedi, et al., 2021]                                             |
| 3-Hydroxy-damascone                       | 5366075 | [Grauso, et al., 2020]                                                                       |
| 2-(1-Pentenyl)furan                       | 5369956 | [Ilies, et al., 2012]                                                                        |
| 3-Oxo-a-ionol                             | 5370052 | [Grauso, et al., 2020]                                                                       |
| Abscisic acid                             | 5375199 | [Roschek Jr., et al., 2009]                                                                  |
| 2-deoxy-D-ribose                          | 5460005 | [Roschek Jr., et al., 2009]                                                                  |
| Isorhamnetin 3-O-rutinoside               | 5481663 | [Pinelli, et al., 2008] [Grauso, et al., 2020]                                               |
| Kaempferol rhamnoside                     | 5835713 | [Repajić, et al., 2021]                                                                      |
| Caffeoylmalic acid                        | 6124299 | [Grauso, et al., 2020] [Majedi, et al., 2021] [Pinelli, et al., 2008] [Garcia, et al., 2021] |
| 1,2-Diguaiacyl-1,3- propanediol           | 6426042 | [Grauso, et al., 2020]                                                                       |
| Calamenene                                | 6429077 | [Gül, et al., 2012]                                                                          |
| 3,4-Dimethyl-5-pentylidene-2(5H)-furanone | 6433214 | [Gül, et al., 2012]                                                                          |
| Oxime- methoxy-phenyl                     | 9602988 | [Al-Tameme, et al., 2015] [Majedi, et al., 2021]                                             |
| 4-shogaol                                 | 9794897 | [Roschek Jr., et al., 2009] [Ayers, et al., 2008]                                            |
| Estra-1,3,5(10)-trien-17B-ol              | 9811784 | [Majedi, et al., 2021]                                                                       |

|                                                        |           |                                                                  |
|--------------------------------------------------------|-----------|------------------------------------------------------------------|
| Caffeoyl tartaric acid                                 | 9857913   | [Grauso, et al., 2020]                                           |
| (+)-Neo-olivil                                         | 9976812   | [Grauso, et al., 2020]                                           |
| $\beta$ -Bisabolene                                    | 10104370  | [Ilies, et al., 2012] [Gül, et al., 2012] [Grauso, et al., 2020] |
| Caffeoylquinic acid                                    | 10155076  | [Pinelli, et al., 2008]                                          |
| O-Feruloyl quinic acid                                 | 10177048  | [Grauso, et al., 2020]                                           |
| Dihydrokavain                                          | 10220256  | [Roschek Jr., et al., 2009]                                      |
| 1-Hydroxy-1-(4- hydroxyphenyl)-2-propanone             | 10261435  | [Grauso, et al., 2020]                                           |
| 1,6-dioxaspiro[4.4]non-3-ene                           | 10374471  | [Roschek Jr., et al., 2009]                                      |
| Phosphatidylcholine                                    | 10425706  | [Roschek Jr., et al., 2009]                                      |
| $\alpha$ -Selinene                                     | 10856614  | [Ilies, et al., 2012]                                            |
| Tachioside                                             | 11962143  | [Grauso, et al., 2020]                                           |
| Phytosterols                                           | 12303662  | [Majedi, et al., 2021]                                           |
| 7 $\beta$ -Hydroxy-sitosterol                          | 12309569  | [Grauso, et al., 2020]                                           |
| Dicaffeoylquinic acid                                  | 12358846  | [Grauso, et al., 2020]                                           |
| 3,4-Dimethyl-5-pentylfuran-2(5H)-one                   | 13192443  | [Gül, et al., 2012]                                              |
| $\beta$ - Vetivenene                                   | 14475467  | [Ilies, et al., 2012]                                            |
| Kaempferol pentoside                                   | 14749097  | [Repajić, et al., 2021]                                          |
| Isotachioside                                          | 15098566  | [Grauso, et al., 2020]                                           |
| Bioallethrin                                           | 15558638  | [Roschek Jr., et al., 2009]                                      |
| Quercetin rhamnoside                                   | 15939939  | [Repajić, et al., 2021]                                          |
| $\alpha$ - Copaene-8-ol                                | 25086830  | [Ilies, et al., 2012]                                            |
| Quercetin-3-O-glucoside                                | 25203368  | [Grauso, et al., 2020]                                           |
| Peonidin 3-O-rutinoside                                | 44256842  | [Pinelli, et al., 2008] [Grauso, et al., 2020]                   |
| Apigenin-7-O-glucoside                                 | 44257792  | [Grauso, et al., 2020] [Grauso, et al., 2019]                    |
| [1,1-Bicyclopropyl-2-octanoic acid 2hexyl-methyl ester | 50930793  | [Al-Tameme, et al., 2015] [Majedi, et al., 2021]                 |
| 4-O-Caffeoylquinic acid                                | 58427569  | [Grauso, et al., 2020]                                           |
| Hydroxycinnamaldehyde                                  | 71407359  | [Roschek Jr., et al., 2009]                                      |
| Feruloyl malate                                        | 71694479  | [Grauso, et al., 2020]                                           |
| Incensole oxide acetate                                | 73755086  | [Roschek Jr., et al., 2009]                                      |
| Incensole oxide                                        | 90470329  | [Roschek Jr., et al., 2009]                                      |
| Sitosterol- $\beta$ -D-glucoside                       | 91884650  | [Grauso, et al., 2020]                                           |
| p-Coumaroylmalic acid                                  | 129720114 | [Grauso, et al., 2020]                                           |
| Caffeoyl feruloyl tartaric acid                        | 129724266 | [Grauso, et al., 2020]                                           |
| 8-dehydrogingerdione                                   | 131752598 | [Roschek Jr., et al., 2009]                                      |
| Isorhamnetin rutinoside                                | 133562525 | [Repajić, et al., 2021] [Garcia, et al., 2021]                   |

**Table S18.** Structure used and detailed information about the system characteristics.

| Receptor                                                                                | PDB ID | Co-crystallized ligand | Resolution | Reference               |
|-----------------------------------------------------------------------------------------|--------|------------------------|------------|-------------------------|
| Histamine receptor 1 (HR1)                                                              | 7DFL   | Histamine              | 3.30 Å     | [Xia, et al., 2021]     |
| Neurokinin 1 receptor (NK1R)                                                            | 6J20   | Aprepitant             | 2.70 Å     | [Chen, et al., 2019]    |
| Cysteinyl leukotriene receptor 1 (CLR1)                                                 | 6rz5   | Zafirlukast            | 2.53 Å     | [Luginina, et a., 2019] |
| Chemoattractant receptor–homologous molecule expressed on type 2 helper T cells (CRTH2) | 7m8w   | 15mPGD2                | 2.61 Å     | [Liu, et al., 2021]     |
| Bradykinin receptor type 2 (BK2R)                                                       | 7F6H   | Bradykinin             | 2.90 Å     | [Shen, et al., 2022]    |

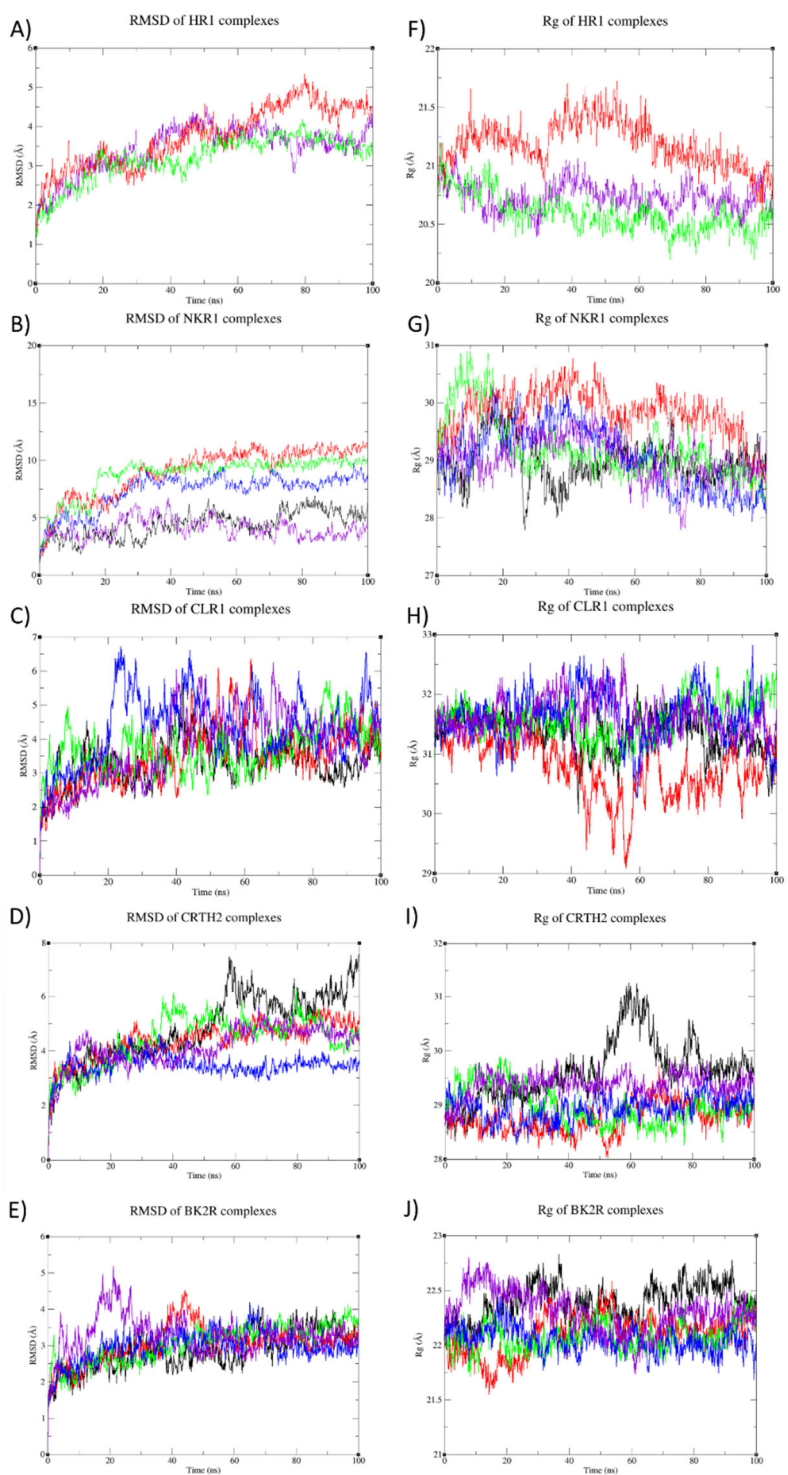

**Figure S1.** RMSD of A) HR1, B) NKR1, C) CLR1, D) CRTH2, E) BK2R. Rg of F) HR1, G) NKR1, H) CLR1, I) CRTH2, J) BK2R. Color code: Black: Known inhibitor, Red: Alpha-tocotrienol, Green: Amentoflavone, Purple: Isorhamnetin-3-O-rutinoside, and Blue: neoxanthin.

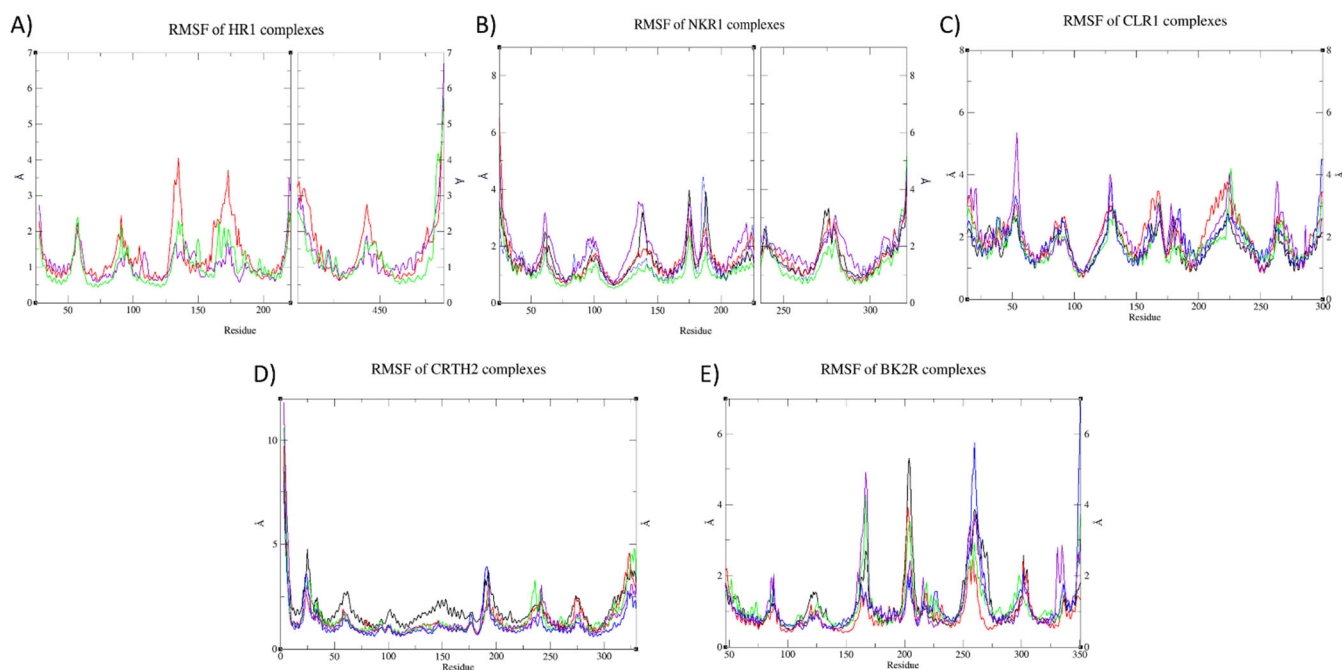

**Figure S2.** RMSF of A) HR1, B) NK1R, C) CLR1, D) CRTH2, E) BK2R. Color code: Black: Known inhibitor, Red: Alpha-tocotrienol, Green: Amentoflavone, Purple: Isorhamnetin-3-O-rutinoside, and Blue: neoxanthin.

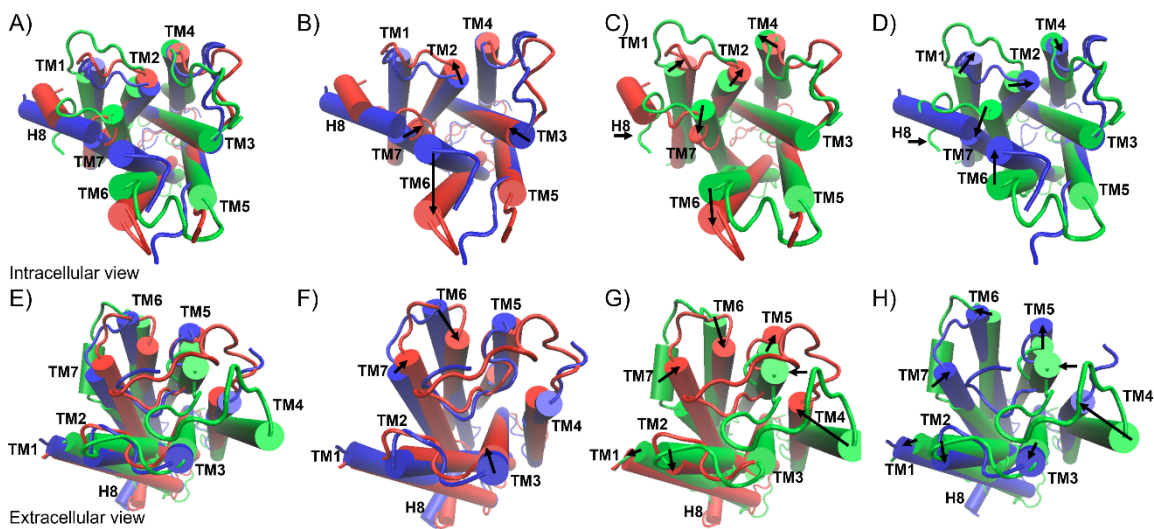

**Figure S3.** Structural comparison between HR1-alpha-tocotrienol complex (Green), HR1-Histamine (Red) and HR1-Doxepin (Blue). Intracellular view of A) the 3 structures, B) HR1-Histamine and HR1-

Doxepin, C) HR1-Histamine and HR1-alpha-tocotrienol, D) HR1-alpha-tocotrienol and HR1-Doxepin. Extracellular view of E) the 3 structures, F) HR1-Histamine and HR1-Doxepin, G) HR1-Histamine and HR1-alpha-tocotrienol, H) HR1-alpha-tocotrienol and HR1-Doxepin.

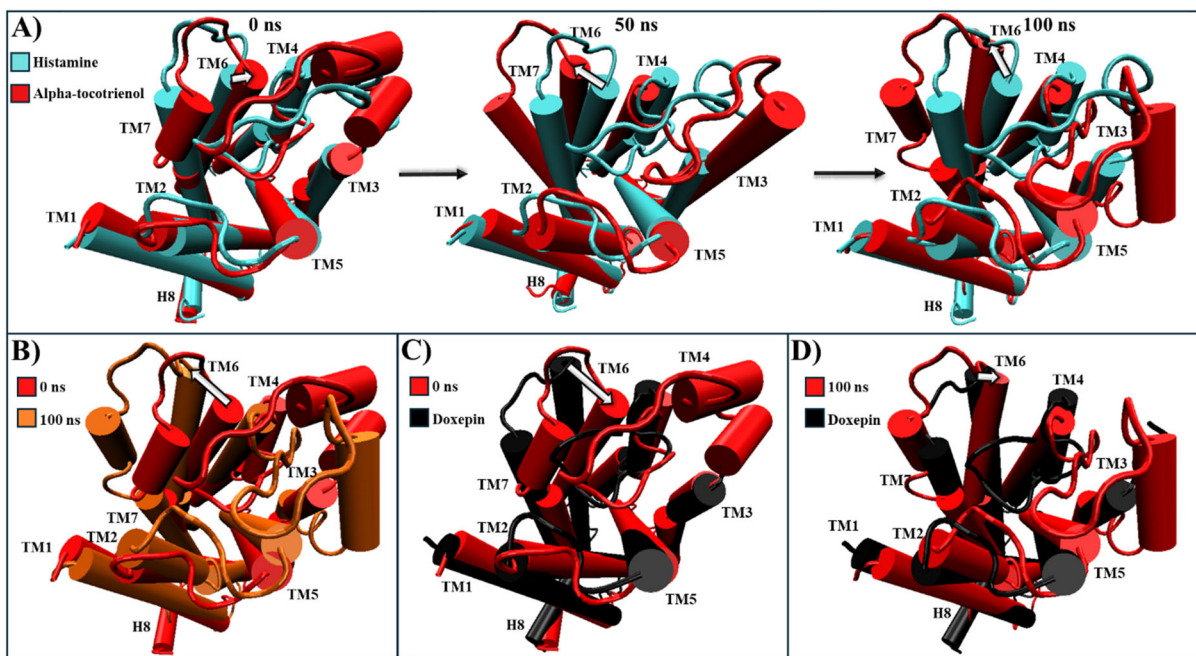

**Figure S4.** Structural comparison at the extracellular view of A) alpha-tocotrienol complex (red) within 0, 50 and 100 ns and Histamine experimental structure (cyan), B) alpha-tocotrienol complex at 0 ns (red), and 100 ns (orange), C) alpha-tocotrienol complex at 0 ns (red), and Doxepin experimental structure (black), D) alpha-tocotrienol complex at 100 ns (red), and Doxepin experimental structure (black).



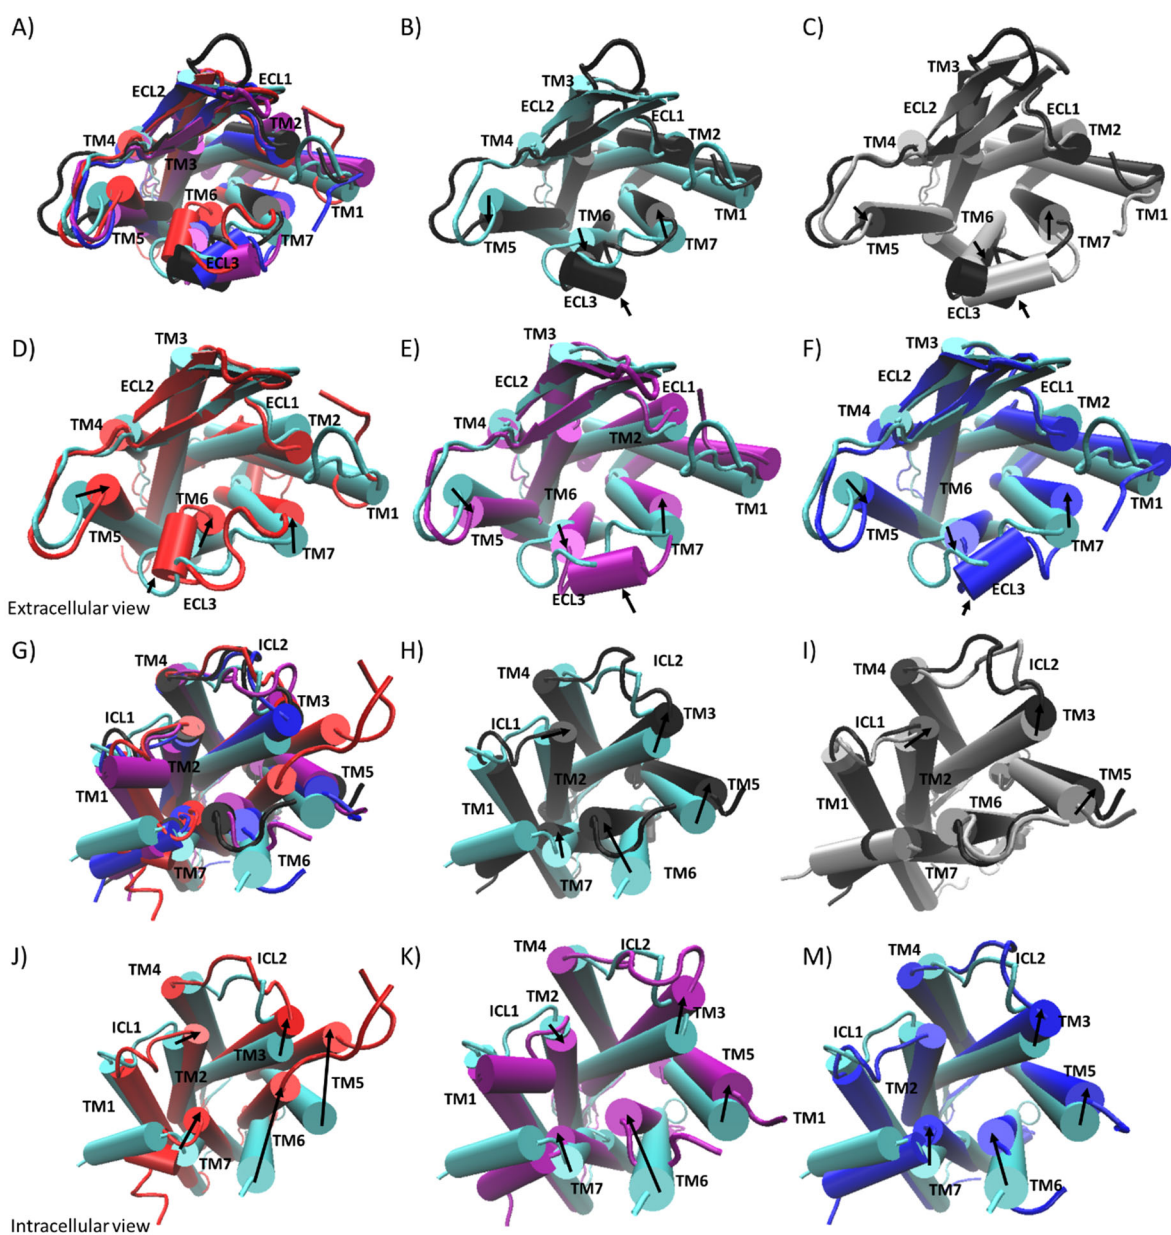

**Figure S5.** Structural comparison between structures. Extracellular view of A) all structures, B) NKR1-Substance P (turquoise) and MD NKR1-aprepitant (black), C) MD NKR1-aprepitant and experimental NKR1-aprepitant (silver), and NKR1-Substance P with D) NKR1-alpha-tocotrienol (red), E) NKR1-isorhamnetin 3-O-rutinoside (purple), and F) NKR1-neoxanthin (blue). Intracellular view of G) all structures, H) NKR1-Substance P and MD NKR1-aprepitant, I) MD NKR1-aprepitant and experimental NKR1-aprepitant, and NKR1-Substance P with J) NKR1-alpha-tocotrienol, K) NKR1-isorhamnetin 3-O-rutinoside, and M) NKR1-neoxanthin.

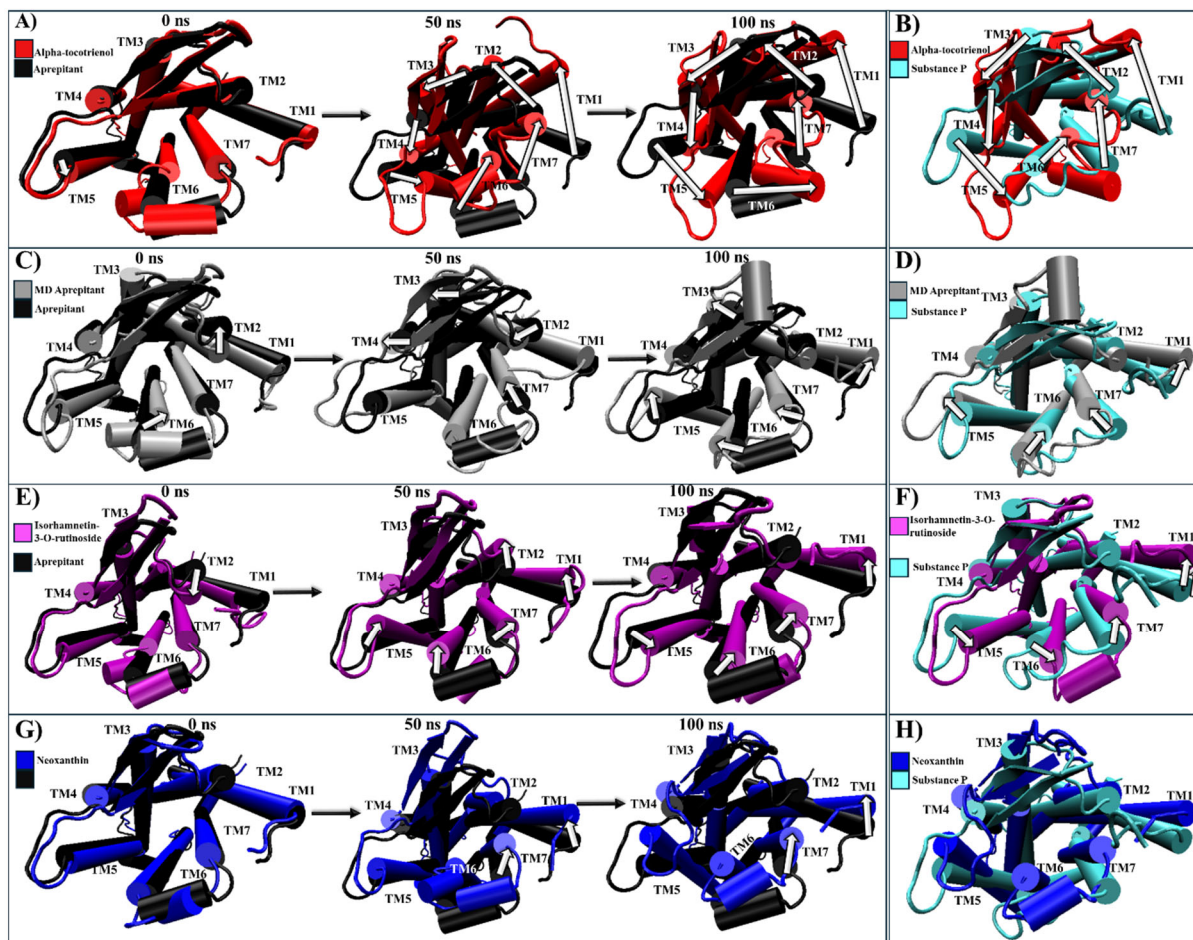

**Figure S6.** NKR1 structural comparison at the extracellular view of A) alpha-tocotrienol complex (red) within 0, 50 and 100 ns and experimental structure of NKR1/aprepitant (black), B) alpha-tocotrienol complex and the experimental structure of NKR1/ Substance P (Cyan), C) MD aprepitant complex (red) within 0, 50 and 100 ns and experimental structure of NKR1/aprepitant (black), D) MD aprepitant complex and the experimental structure of NKR1/ Substance P (Cyan), E) Isorhamnetin-3-O-rutinoside complex (red) within 0, 50 and 100 ns and experimental structure of NKR1/aprepitant (black), F) Isorhamnetin-3-O-rutinoside complex and the experimental structure of NKR1/ Substance P (Cyan), G) Neoxanthin complex (red) within 0, 50 and 100 ns and experimental structure of NKR1/aprepitant (black), H) Neoxanthin complex and the experimental structure of NKR1/ Substance P (Cyan).

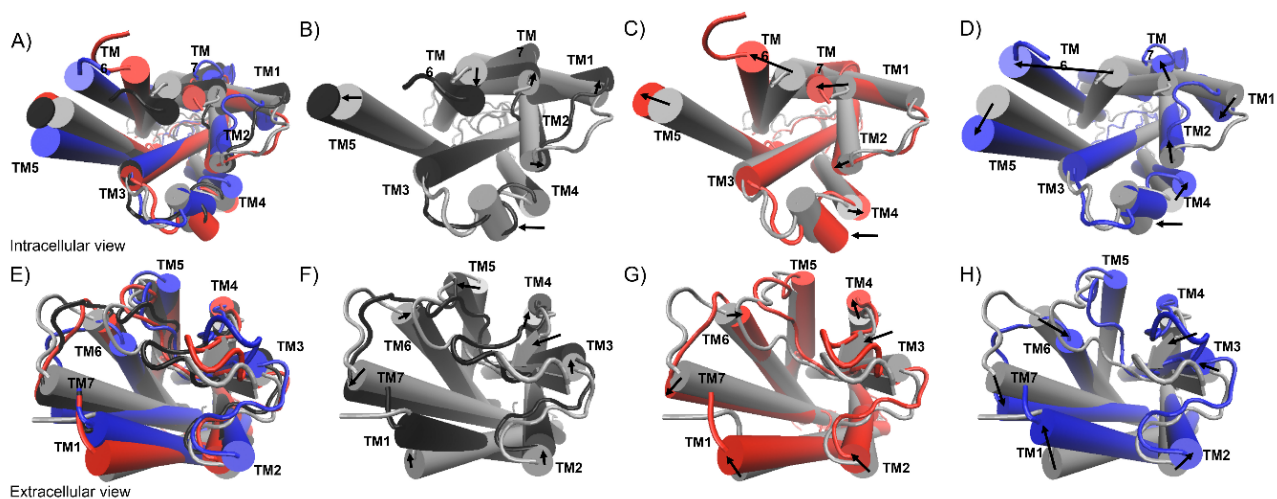

**Figure S7.** Structural comparison between structures. Intracellular view of experimental CLR1-zafirlukast and A) all structures, B) MD CLR1-zafirlukast, C) CLR1-alpha-tocotrienol (red), D) CLR1-neoxanthin (blue). Extracellular view of CLR1-zafirlukast and E) all structures, F) MD CLR1-zafirlukast, G) CLR1-alpha-tocotrienol (red), H) CLR1-neoxanthin (blue).

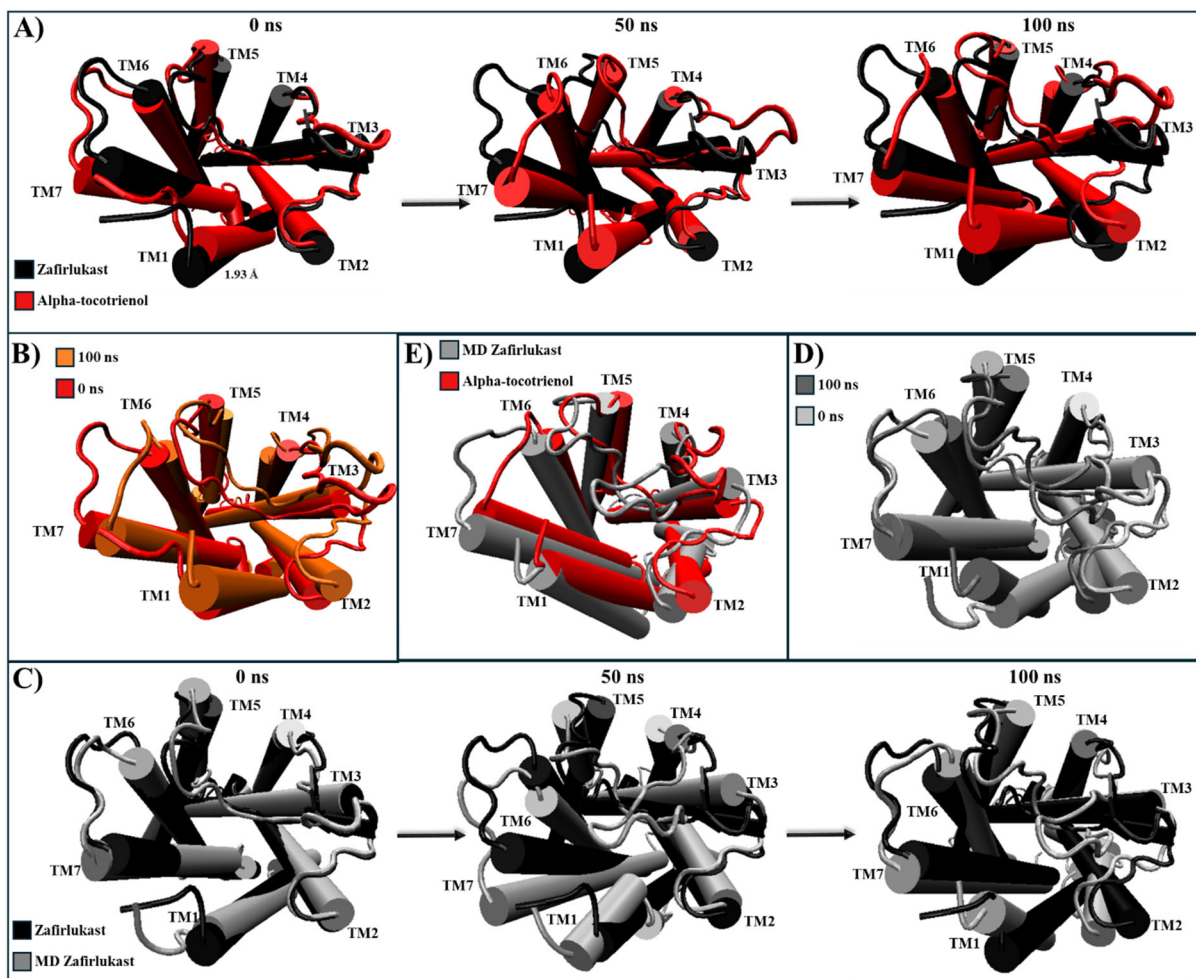

**Figure S8.** CLR1 structural comparison at the extracellular view of A) alpha-tocotrienol complex (red) within 0, 50 and 100 ns and experimental structure of CLR1/zafirlukast (black), B) alpha-tocotrienol complex at 0 ns (red) and 100 ns (orange), C) MD zafirlukast complex (silver) within 0, 50 and 100 ns and experimental structure of CLR1/zafirlukast (black), D) zafirlukast complex at 0 ns (silver) and 100 ns (grey), E) alpha-tocotrienol complex (red) and MD zafirlukast at 100 ns (silver).



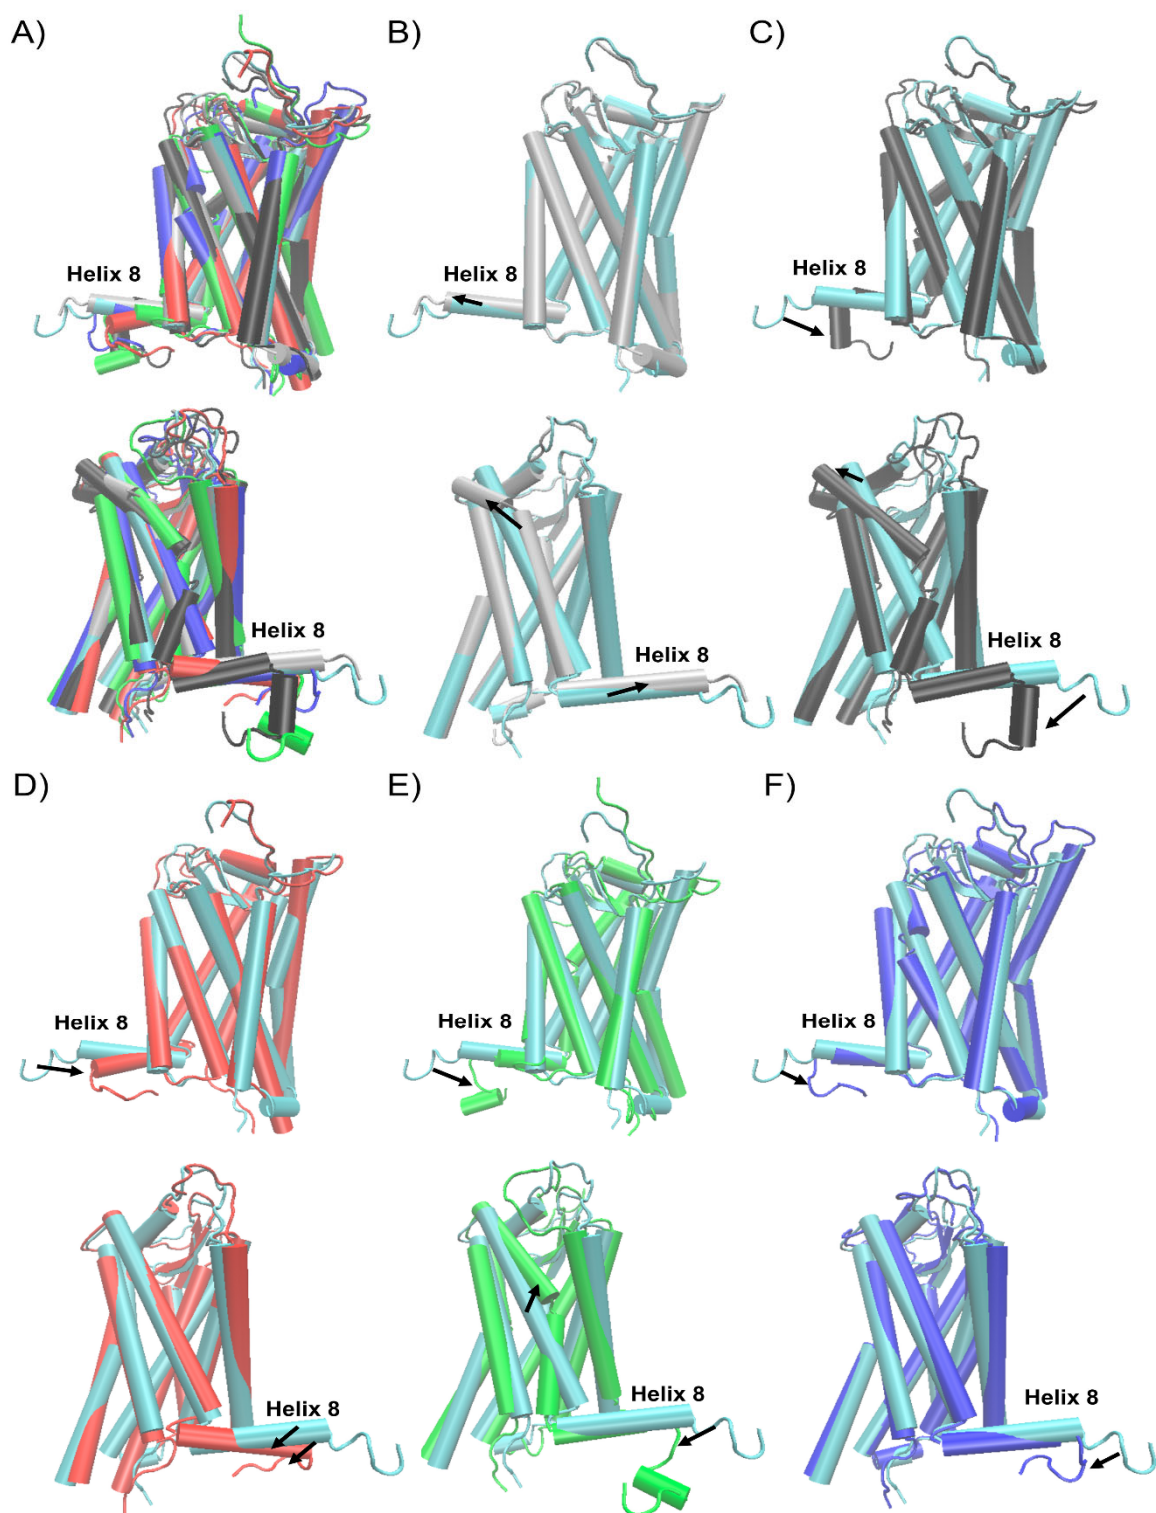

**Figure S9.** Structural comparison between structures. Lateral view of experimental CRTH2- 15R-methyl-PGD2 and A) all structures, B) experimental structure of CRTH2-fevipiprant (silver), C) MD CRTH2-fevipiprant (black), D) CRTH2-alpha-tocotrienol (red), E) CRTH2-amentoflavone (green), and F) CRTH2-neoxanthin (blue).

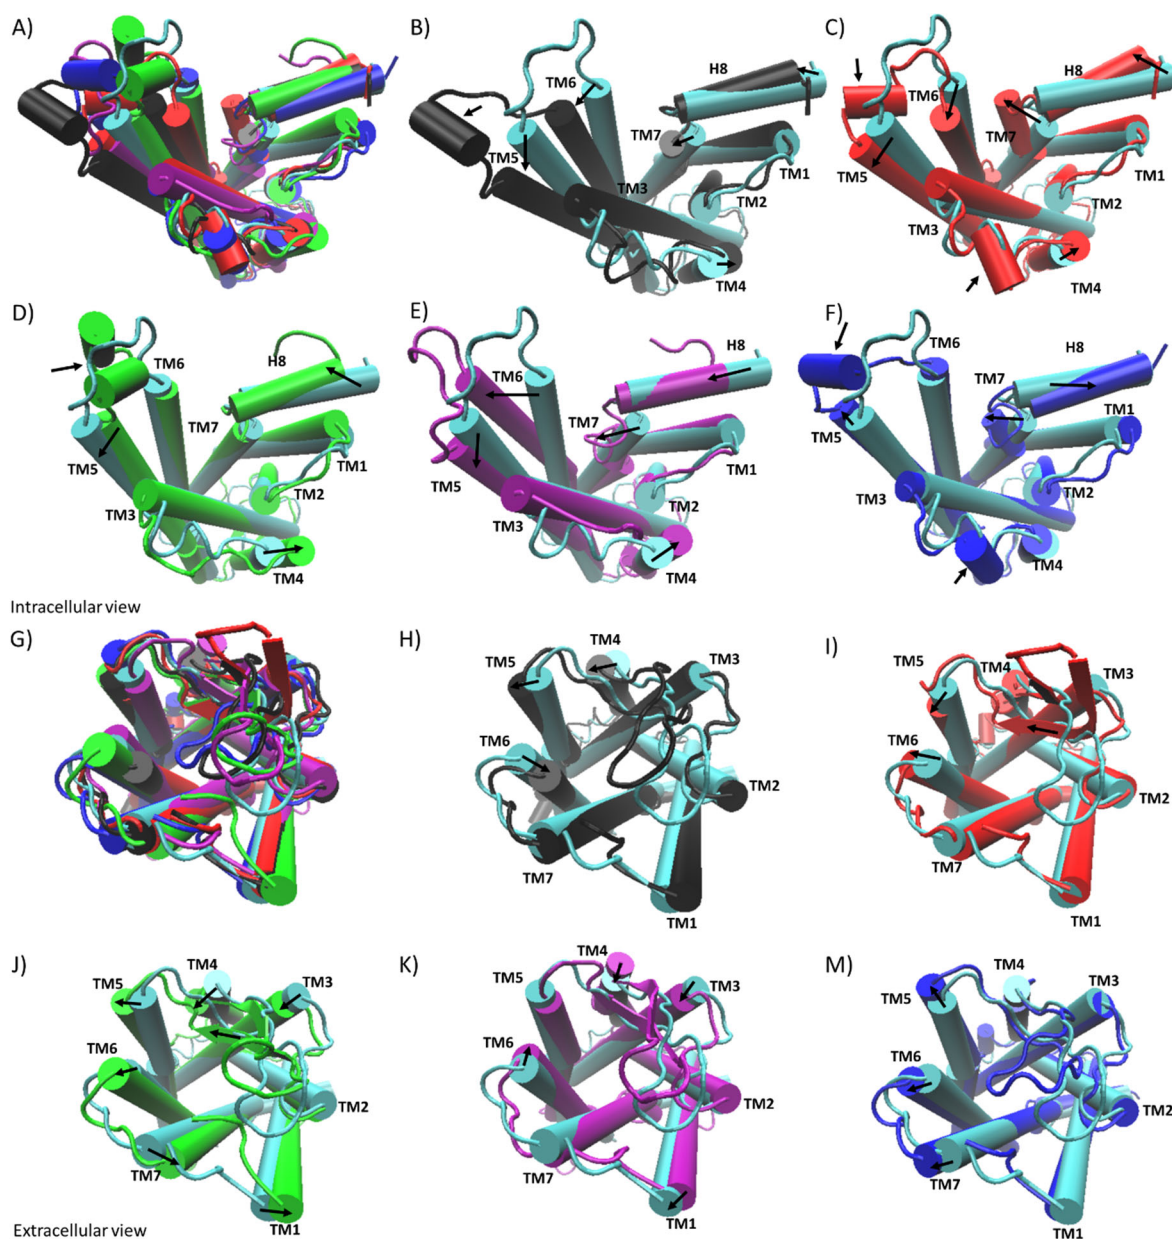

**Figure S10.** Intracellular view of experimental BK2R-Gq-bradykinin and A) all structures, B) BK2R-JSM-10292 (black), C) BK2R- $\alpha$ -tocotrienol (red), D) BK2R-amentoflavone (green), E) BK2R-isorhamnetin-3-O-rutinoside (purple), and F) BK2R-neoxanthin (blue). Extracellular view of BK2R-Gq-bradykinin and H) BK2R-JSM-10292, I) BK2R- $\alpha$ -tocotrienol, J) BK2R-amentoflavone, K) BK2R-isorhamnetin-3-O-rutinoside, and M) BK2R-neoxanthin.

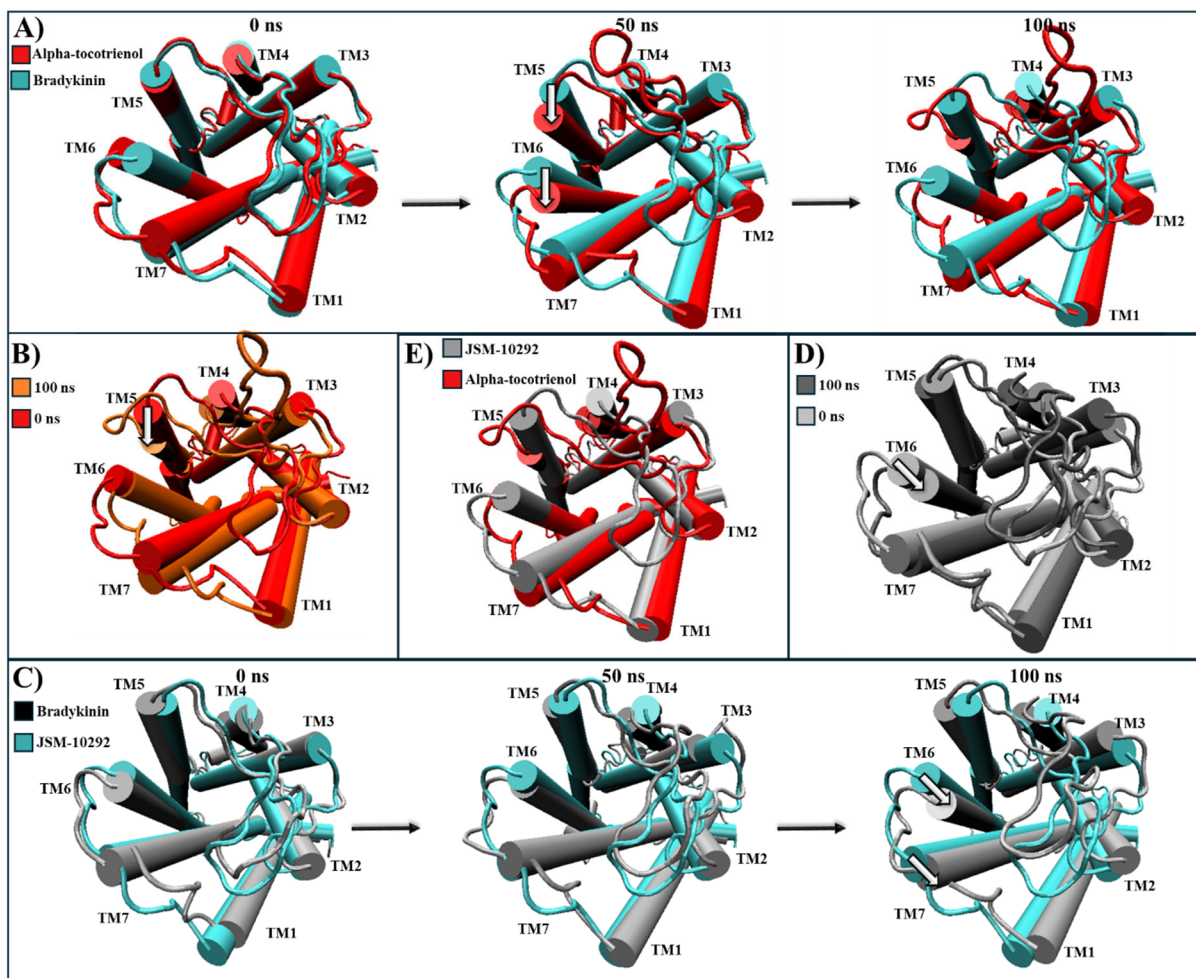

**Figure S11.** BK2R structural comparison at the extracellular view of A) alpha-tocotrienol complex (red) within 0, 50 and 100 ns and experimental structure of BK2R/bradykinin (cyan), B) alpha-tocotrienol complex at 0 ns (red) and 100 ns (orange), C) JSM-10292 complex (silver) within 0, 50 and 100 ns and experimental structure of BK2R/bradykinin (cyan), D) JSM-10292 complex at 0 ns (silver) and 100 ns (grey), E) alpha-tocotrienol complex (red) and JSM-10292 at 100 ns (silver).



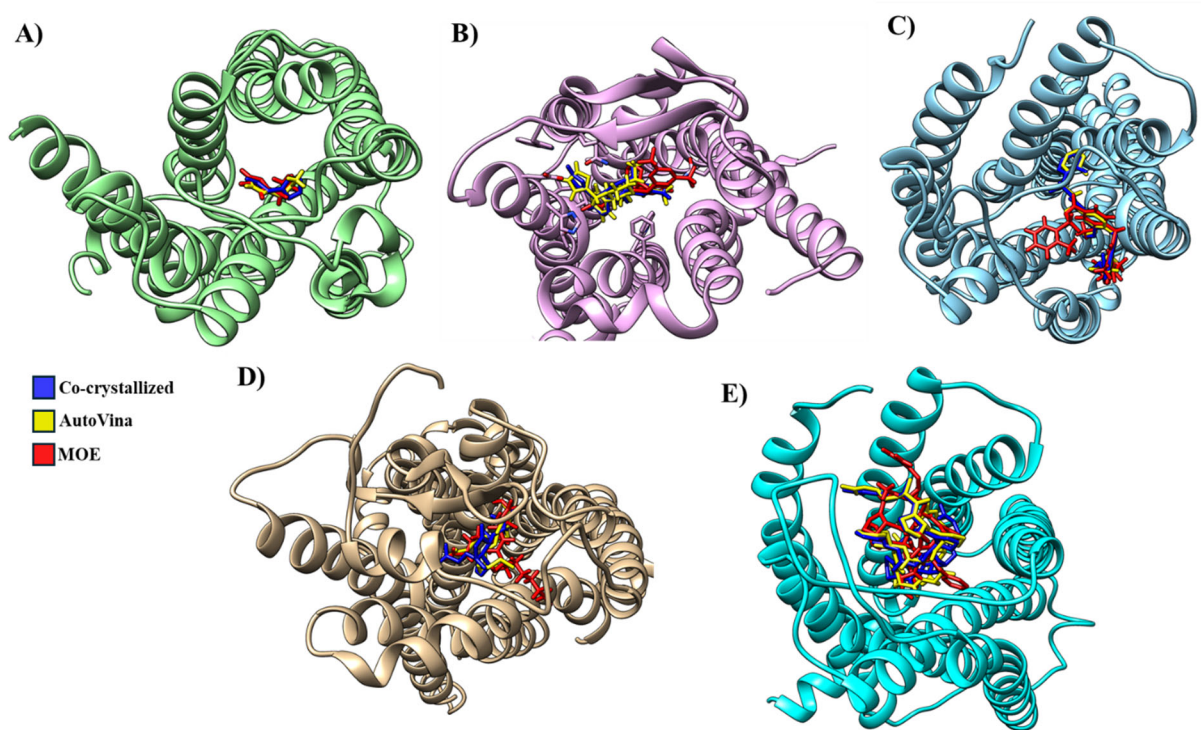

**Figure S12.** Illustration of the 3D re-docking process with the co-crystallized ligands for each receptor, utilizing both software platforms. A) HR1, B) NK1R, C) CLR1, D) CRTH2, and E) BK2R.



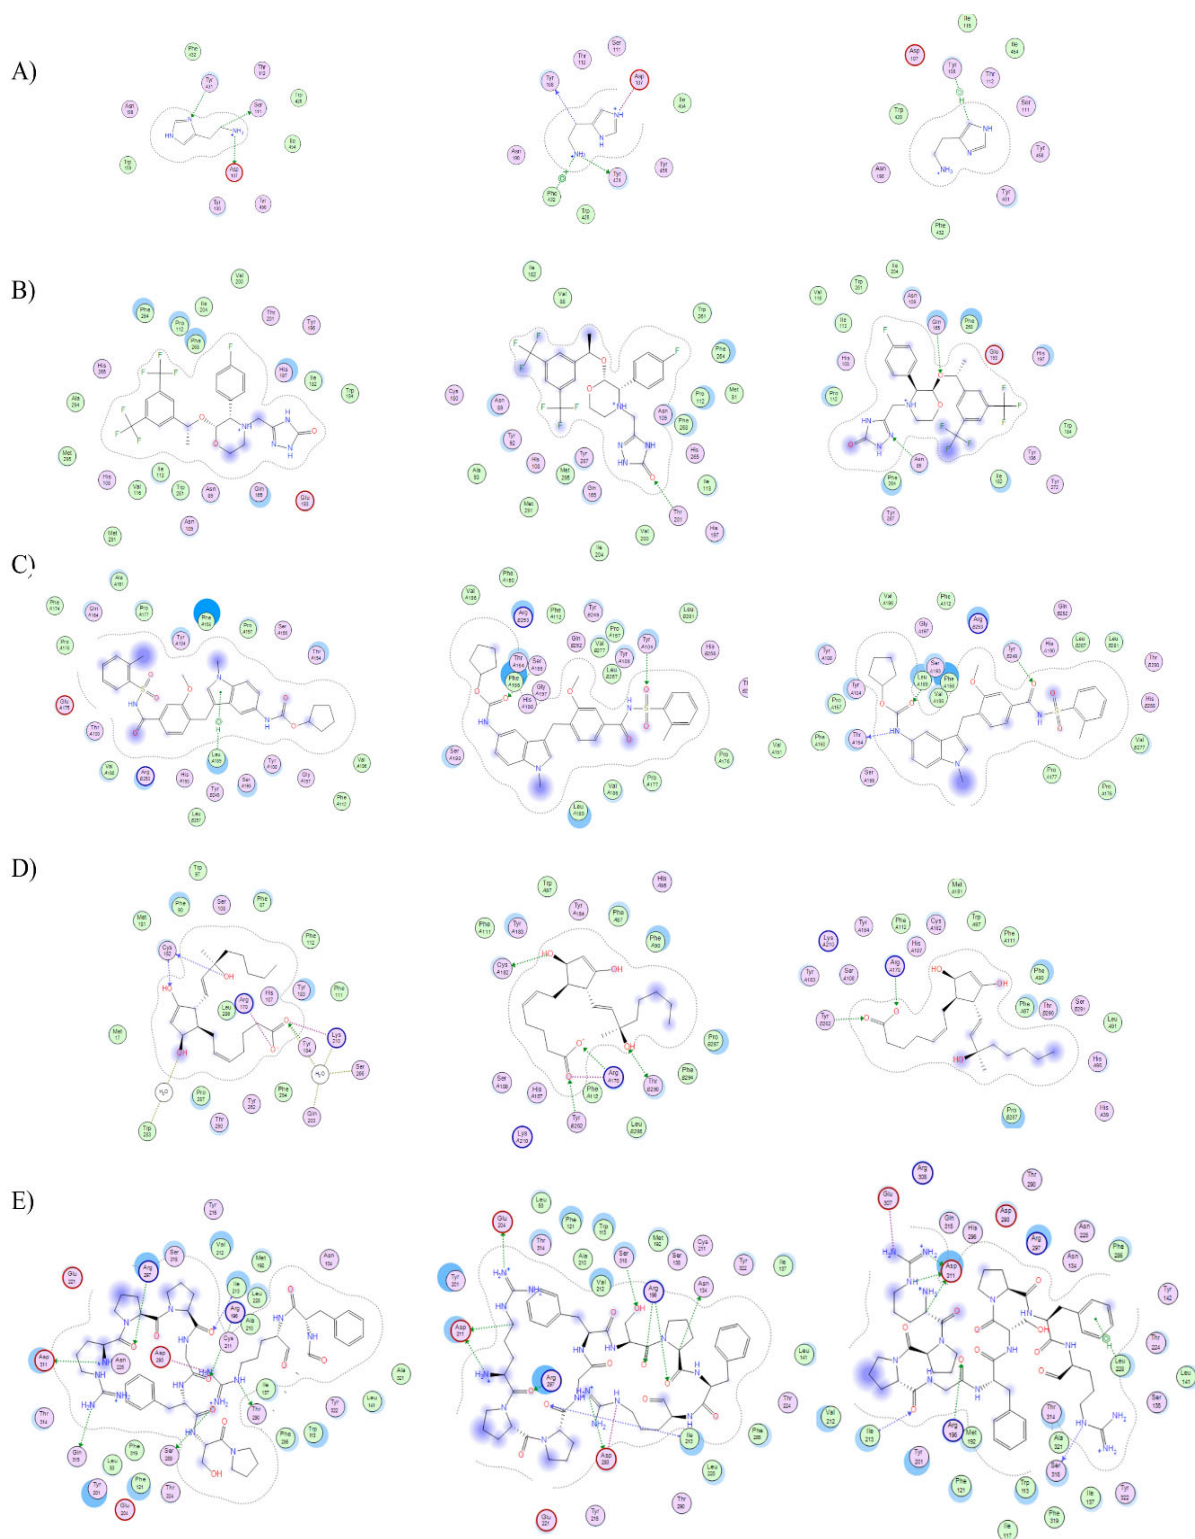

**Figure S13.** Illustration of the 2D re-docking process with the co-crystallized ligands (first image) utilizing Vina (second image, and MOE (last image). A) HR1, B) NK1R, C) CLR1, D) CRTH2, and E) BK2R.

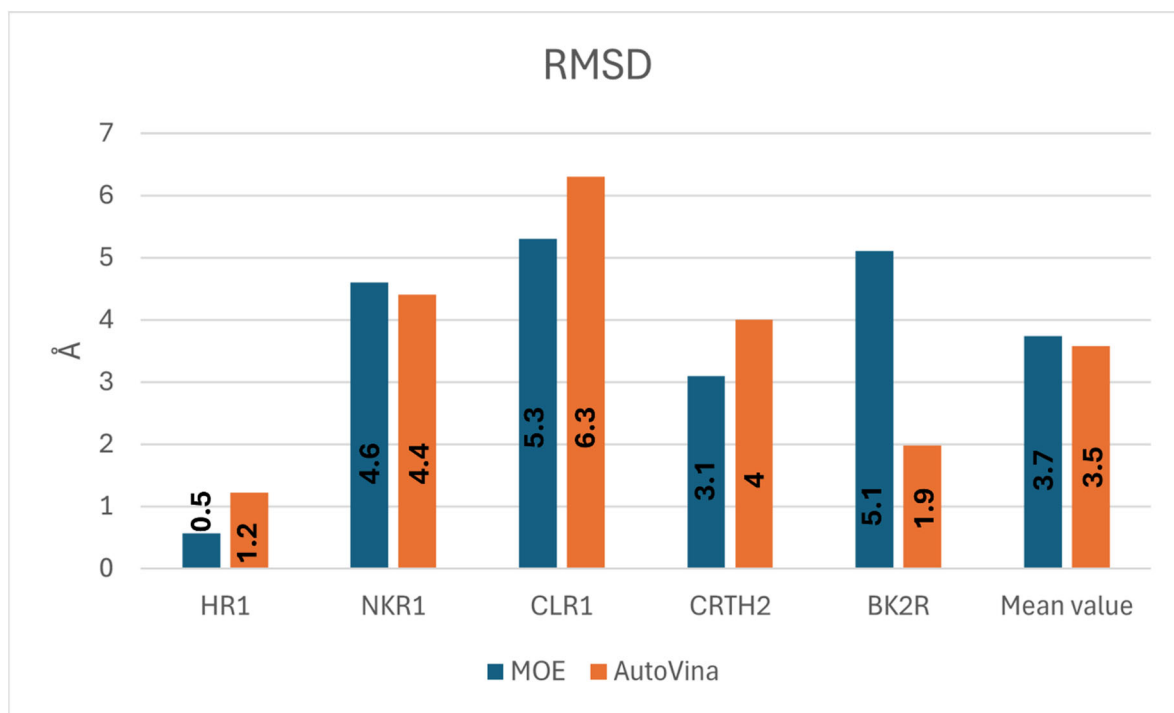

**Figure S14.** RMSD values for the redock.
